# Supplementary material for: Preoperative predictors of poor acute postoperative pain control: a systematic review and meta-analysis
Source: PubMed Central journal article supplement — BMJ Open. 2019 Apr 1;9(4):e025091. doi: 10.1136/bmjopen-2018-025091 (PMC6500309; doi:10.1136/bmjopen-2018-025091), 2019-04-01
Supplement: bmjopen-2018-025091.draft_revisions.pdf [file bmjopen-2018-025091.draft_revisions.pdf]

# BMJ Open

BMJ Open is committed to open peer review. As part of this commitment we make the peer review history of every article we publish publicly available.

When an article is published we post the peer reviewers' comments and the authors' responses online. We also post the versions of the paper that were used during peer review. These are the versions that the peer review comments apply to.

The versions of the paper that follow are the versions that were submitted during the peer review process. They are not the versions of record or the final published versions. They should not be cited or distributed as the published version of this manuscript.

BMJ Open is an open access journal and the full, final, typeset and author-corrected version of record of the manuscript is available on our site with no access controls, subscription charges or pay-per-view fees (<http://bmjopen.bmj.com>).

If you have any questions on BMJ Open's open peer review process please email [editorial.bmjopen@bmj.com](mailto:editorial.bmjopen@bmj.com)

# BMJ Open

## Preoperative predictors of poor acute postoperative pain control: a systematic review and meta-analysis

|                               |                                                                                                                                                                                                                                                                                                                                                                                                                                                                                          |
|-------------------------------|------------------------------------------------------------------------------------------------------------------------------------------------------------------------------------------------------------------------------------------------------------------------------------------------------------------------------------------------------------------------------------------------------------------------------------------------------------------------------------------|
| Journal:                      | <i>BMJ Open</i>                                                                                                                                                                                                                                                                                                                                                                                                                                                                          |
| Manuscript ID                 | bmjopen-2018-025091                                                                                                                                                                                                                                                                                                                                                                                                                                                                      |
| Article Type:                 | Research                                                                                                                                                                                                                                                                                                                                                                                                                                                                                 |
| Date Submitted by the Author: | 02-Jul-2018                                                                                                                                                                                                                                                                                                                                                                                                                                                                              |
| Complete List of Authors:     | Yang, Michael M.H.; University of Calgary, Clinical Neurosciences<br>Hartley, Rebecca; University of Calgary, Surgery<br>Leung, Alexander; University of Calgary, Department of Community Health Sciences<br>Ronksley, Paul; University of Calgary, Community Health Sciences<br>Jette, Nathalie; Icahn School of Medicine at Mount Sinai, Neurology<br>Casha, Steven; University of Calgary, Clinical Neurosciences<br>Riva-Cambrin, Jay; University of Calgary, Clinical Neurosciences |
| Keywords:                     | postoperative pain, preoperative predictors, SURGERY, pain, pain scale, meta-analysis                                                                                                                                                                                                                                                                                                                                                                                                    |
|                               |                                                                                                                                                                                                                                                                                                                                                                                                                                                                                          |

SCHOLARONE™  
Manuscripts

Peer Review Only

## Preoperative predictors of poor acute postoperative pain control: a systematic review and meta-analysis

Michael M.H. Yang MD M.Biotech<sup>1,2</sup>, Rebecca L. Hartley MD<sup>2,3</sup>, Alexander A. Leung MD MPH<sup>2,4</sup>, Paul E. Ronksley PhD<sup>2</sup>, Nathalie Jetté MD MSc<sup>5</sup>, Steven Casha MD PhD<sup>1</sup>, Jay Riva-Cambrin MD MSc<sup>1,2</sup>

### Affiliations:

<sup>1</sup>Department of Clinical Neurosciences, Section of Neurosurgery, University of Calgary, Canada

<sup>2</sup>Department of Community Health Sciences, University of Calgary, Canada

<sup>3</sup>Section of Plastic Surgery, Department of Surgery, University of Calgary, Canada

<sup>4</sup>Division of Endocrinology and Metabolism, Department of Medicine, University of Calgary, Canada

<sup>5</sup>Icahn School of Medicine at Mount Sinai, Department of Neurology, USA

### Author of Correspondence:

Dr. Michael M.H. Yang

Department of Clinical Neurosciences

University of Calgary

12<sup>th</sup> Floor, 29 Street NW

Calgary, AB, T2N 2T9, Canada

Email: [minhan.yang@ucalgary.ca](mailto:minhan.yang@ucalgary.ca)

Telephone: 1-403-667-3678

Fax: 1-403-283-5559

**PROSPERO ID:** CRD42017080682

**Funding Statement:** This research received no specific grant from any funding agency in the public, commercial or not-for-profit sectors

**Conflict of Interest:** The authors declare no competing interests.

**Abbreviated Title (running head):** Predictors of poor acute postoperative pain control in adults

**Data Sharing Statement:** Extracted data and statistical code will be made available by contacting the corresponding author.

**Patient Consent:** Patient consent is not required when conducting a systematic review.

**Ethics Approval:** This study did not require ethical approval as the data used have been published previously, and hence are already in the public domain.

**Keywords:** postoperative pain, preoperative predictors, surgery, pain, pain scales, meta-analysis

**Word Count:** 3347

## Abstract

### Objectives

Inadequate postoperative pain control is common and is associated with poor clinical outcomes. This study aimed to identify preoperative predictors of poor postoperative pain control in adults undergoing inpatient surgery.

### Design

Systematic review and meta-analysis.

### Methods

MEDLINE, EMBASE, CINAHL, and PsychInfo was systematically searched from inception until October 2017, supplemented with a grey literature search, and consultation with a pain expert. Studies in any language were included if they evaluated postoperative pain using a validated instrument (e.g., visual-analogue-scale for pain) in adults ( $\geq 18$  years) and reported a measure of association between poor postoperative pain control and at least one preoperative predictor during the hospital stay. Articles were screened in duplicate and data extracted by 2 independent reviewers. Measures of association for each preoperative predictor were pooled using random effects models.

### Results

Thirty-three studies representing 53,362 patients were included in this review. Significant preoperative predictors of poor postoperative pain control included younger age (OR 1.18 [95%CI 1.05-1.32]), female sex (OR 1.29 [95%CI 1.17-1.43]), smoking (OR 1.33 [95%CI 1.09-1.61]), history of depressive symptoms (OR 1.71 [95%CI 1.32-2.22]), history of anxiety symptoms (OR 1.22 [95%CI 1.09-1.36]), sleep difficulties (OR 2.32 [95%CI 1.46-3.69]), higher BMI (OR 1.02 [95%CI 1.01-1.03]), presence of preoperative pain (OR 1.21 [95%CI 1.10-1.32]), and use of preoperative analgesia (OR 1.54 [95%CI 1.18-2.03]). Pain catastrophizing, ASA status, chronic pain, marital status, socioeconomic status, education, previous surgical history, preoperative pressure pain tolerance, and orthopedic surgery (vs abdominal surgery) were not associated with an increased odds of poor postoperative pain control. Study quality was generally high, although appropriate blinding of exposure during outcome ascertainment was often limited.

### Conclusion

Nine predictors of poor postoperative pain control were identified. These should be recognized as potentially important factors when developing discipline specific clinical-care pathways to improve pain outcomes and to guide future surgical pain research.

## Article Summary

### *Strengths and limitations of this study*

- This systematic review provides a comprehensive meta-analysis on a large number of preoperative patient prognostic factors for poor acute postoperative pain control.
- The inclusion of multiple surgical specialties and articles representing diverse geographical locations increases the generalizability of the findings.
- There were a variety of thresholds used to categorize continuous preoperative variables between studies often reflecting diverse populations.
- For certain preoperative variables, the number of studies included were few and may be underpowered to detect significant differences.

## Introduction

Since 1999, when the Joint Commission on Accreditation of Healthcare Organizations set the standard for the appropriate assessment and management of pain, pain has been recognized as the fifth vital sign.<sup>1</sup> With the aging and growing population, the number of surgeries has increased to an excess of 280 million procedures performed globally every year.<sup>2-8</sup> Numerous studies suggest poor acute postoperative pain control is common and often inadequately treated.<sup>9-12</sup> Importantly, ineffective postoperative pain control is associated with poor outcomes including increased length-of-stay, sleep disturbance, prolonged time to first mobilization, and increased opioid use.<sup>11 13 14</sup> Further, poor postoperative pain control is associated with delirium in the elderly, development of chronic pain syndromes, cardiopulmonary, and thromboembolic complications.<sup>10 11 15-17</sup> Postoperative pain may be improved by understanding the preoperative predictors of poor pain control by allowing use of anticipatory and individualized treatments.<sup>18 19</sup>

A previous systematic review reported a limited number of predictors of poor postoperative pain control including age, anxiety, preoperative pain, and surgery type.<sup>20</sup> However, quantitative analysis was not possible due to variability in the reporting of measures of associations and study design heterogeneity of the included studies. Since its publication nearly a decade ago, many additional studies have been published with improved methodological rigour,<sup>21-24</sup> thus providing a new opportunity to provide an updated summary of the literature and to generate pooled estimates of risk. The goal of this study was to systematically identify significant preoperative predictors of poorly controlled acute postoperative pain and to quantify the associated risks. We focused on acute postoperative pain experienced during the surgical hospitalization. This meta-analysis is important to help identify predictors that could inform future surgical pain research

1  
2  
3 and aid in the development of discipline-specific clinical care pathways (e.g., enhanced recovery  
4 after surgery programs) to improve pain outcomes.  
5  
6  
7  
8  
9

## 10 **Methods**

11  
12 This review was reported according to the Meta-analyses Of Observational Studies in  
13 Epidemiology (MOOSE) standards for systematic reviews and meta-analyses of observational  
14 studies. This review was also conducted based on an *a priori* protocol registered with  
15 PROSPERO International Prospective Register of Systematic Review (ID: CRD42017080682,  
16 [http://www.crd.york.ac.uk/PROSPERO/display\\_record.php?ID=CRD42017080682](http://www.crd.york.ac.uk/PROSPERO/display_record.php?ID=CRD42017080682)).<sup>25-27</sup>  
17  
18  
19  
20  
21  
22  
23  
24  
25

### 26 *Patient and Public Involvement*

27  
28 Patients and the public were not involved in the development of this systematic review.  
29  
30  
31  
32

### 33 *Search Strategy*

34  
35 A search strategy was developed using the *Peer Review of Electronic Search Strategy* (PRESS)<sup>28</sup>  
36 in consultation with two research librarians. We focused on the keywords “pain”, “pain  
37 measurement”, “surgery”, and “predictors”. We searched MEDLINE (1950-October 13<sup>th</sup>, 2017),  
38 EMBASE (1980-October 13<sup>th</sup>, 2017), CINAHL (1937-October 13<sup>th</sup>, 2017) and PsychInfo (1967-  
39 October 13<sup>th</sup>, 2017) (Appendix S1, online supplemental information). To maximize sensitivity  
40 for studies of prognosis, search filters were not used, and no restrictions were placed on date or  
41 language of publication.<sup>29 30</sup> Our search was repeated using Google and Google Scholar for the  
42 grey literature. Bibliographies of included studies were searched by hand for other relevant  
43  
44  
45  
46  
47  
48  
49  
50  
51  
52  
53  
54  
55  
56  
57  
58  
59  
60

1  
2  
3 articles. A local pain specialist was also consulted to identify any potential ongoing studies or  
4  
5 unpublished data.  
6  
7  
8  
9

### 10 *Study Inclusion*

11  
12 We included observational studies (cohort and cross-sectional) reporting on adults ( $\geq 18$  years  
13  
14 old) undergoing surgery and admitted for at least 24 hours following their procedure (e.g.,  
15  
16 excluded ambulatory surgery/procedures, dental procedures, carpal tunnel release, etc.), and  
17  
18 studies that assessed for the association between preoperative patient-level predictors of poor  
19  
20 postoperative pain control (as defined by individual study authors). Only inpatient procedures  
21  
22 were included to minimize the heterogeneity of the surgical population as well as providing more  
23  
24 reliable pain outcomes. Perioperative predictors were not assessed because our primary aim was  
25  
26 to inform clinicians evaluating patients in the preoperative clinical setting where perioperative  
27  
28 risk factors may not be known or modifiable. No interventional studies were included.  
29  
30  
31  
32  
33  
34

35  
36 Studies were required to report an assessment of pain during the inpatient period using a  
37  
38 validated pain scale. Previous studies have demonstrated that the visual analogue scale (VAS),  
39  
40 numeric rating scale (NRS), and verbal rating scales (VRS) for pain are highly correlated with  
41  
42 each other, and thus they were considered comparable in the present study.<sup>31</sup> To facilitate  
43  
44 pooling of data, we only included studies that reported a measure of association, such as an odds  
45  
46 ratio (OR) or relative risk (RR), as well as studies with raw data where an OR could be manually  
47  
48 calculated. Conference abstracts, reviews, protocols, and secondary publications (of studies  
49  
50 already included in our review) were excluded. Two reviewers (M.Y. and R.H.) independently  
51  
52 reviewed titles, abstracts, and full-text articles of the retrieved studies in duplicate. Discrepancies  
53  
54  
55  
56  
57  
58  
59  
60



1  
2  
3 were resolved by consensus. Inter-rater agreement was evaluated using Cohen's  $\kappa$  statistic for the  
4  
5 full-text review stage.  
6  
7  
8  
9

### 10 *Data Extraction*

11  
12 Study information such as author, year and country of publication, sample size, pain scale used,  
13  
14 the definition of poorly controlled postoperative pain, number of predictors adjusted for in a  
15  
16 multivariable regression model (where applicable), and the average age of the sample population  
17  
18 were extracted. Both unadjusted and most adjusted effect estimates were recorded whenever  
19  
20 multiple estimates were presented. For studies that reported their results in distinct strata (e.g.,  
21  
22 young vs. old age, or moderate vs. severe pain), each stratum was treated as an independent  
23  
24 study for the pooled analysis (no patients were analyzed in duplicate).<sup>23 32-34</sup> Non-English studies  
25  
26 were data-extracted with the help of a translator.  
27  
28  
29  
30  
31  
32

### 33 *Study Quality Assessment*

34  
35 We used a component-based approach to assess the quality of included studies.<sup>35</sup> The following  
36  
37 variables were considered to be the most important quality indicators for studies of prognosis  
38  
39 (definition of quality indicators are in Table S1, online supplemental information)<sup>35</sup>: description  
40  
41 of population, non-biased selection, adequate follow-up (e.g., postoperative pain measurements  
42  
43 were recorded for at least 80% of study participants), exposure measurement, outcome  
44  
45 measurement and ascertainment, adjustment for confounding variables (operationalized as  
46  
47 adjusting for at least 3 potential confounders), precision of reported results (e.g., reporting of  
48  
49 confidence intervals), as well as the use of an appropriate reference standard (e.g., definition of  
50  
51 poor postoperative pain control provided).<sup>29 36 37</sup> Data-extraction and assessment of study quality  
52  
53  
54  
55  
56  
57  
58  
59  
60

1  
2  
3 were performed in duplicate; discrepancies were resolved by consensus. If a study presented  
4 unclear data, the corresponding author was emailed with a follow-up email after two weeks if a  
5 response was not received.  
6  
7  
8  
9

### 10 11 12 *Statistical Analysis* 13

14 We used ORs as the common measure of association. RRs were converted to odds ratio using the  
15 formula,  $OR = RR / (1 / [1 / (1 - P_o)] + P_o)$ , where  $P_o$  is the incidence of the outcome of interest in the  
16 non-exposed group.<sup>38</sup> When raw data were presented, ORs were manually calculated. For the  
17 primary analysis, the most adjusted ORs were used to determine the pooled estimates. The  
18 analysis was then repeated using the least adjusted effect estimates. Pooled estimates, expressed  
19 as ORs (with 95% confidence intervals [CI]), were determined for each preoperative predictor  
20 associated with poor postoperative pain control levels using the DerSimonian and Laird random  
21 effects model and visualized using forest plots. A random effects model was chosen due to the  
22 variability in surgical specialties, definitions of poor postoperative pain, and the reported timing  
23 of postoperative pain assessment in the included studies. Meta-analysis was performed using the  
24 'metan' command within STATA v.15 (StataCorp, College Station, Texas). Level of  
25 significance was set at  $\alpha=0.05$ .  
26  
27  
28  
29  
30  
31  
32  
33  
34  
35  
36  
37  
38  
39  
40  
41  
42  
43

44 Between-study heterogeneity was examined and quantified using the Cochran Q test and  $I^2$   
45 statistic.<sup>35</sup> Stratified analysis and meta-regression were performed to explore for potential  
46 sources of heterogeneity based on an *a priori* list of factors related to study quality and clinical  
47 prognosis. Stratification was conducted on the following variables: degree of statistical  
48 adjustment (i.e., operationalized as adjustment for <3 vs.  $\geq 3$  variables), definition of poor  
49  
50  
51  
52  
53  
54  
55  
56  
57  
58  
59  
60

1  
2  
3 postoperative pain control (moderate vs. severe pain; moderate pain: 3-6, severe pain: >6 on an  
4 11-point scale; studies not using a numeric scale were considered moderate pain), surgical  
5 discipline, blinding of exposures when assessing pain scores, and location of pain assessment  
6 (e.g., post-anesthetic care unit vs. ward). Preoperative factors only reported in a single study  
7 could not be pooled and therefore were not included in the final analyses. We did not assess for  
8 publication bias because conventional tools used to examine for publication bias, such as funnel  
9 plots, are intended to detect small study effects. Small study effects are challenging to interpret  
10 for meta-analyses of observational studies, such as ours, where multiple sources of heterogeneity  
11 may be present, such as those arising from true clinical differences (e.g., different surgical  
12 disciplines/procedures) or bias inherent to individual studies (e.g., residual confounding, lack of  
13 blinding).<sup>30</sup>

## 30 **Results**

### 33 *Literature Search & Study Characteristics*

34 We identified 9,753 articles through electronic database and grey literature search (Figure 1).  
35 Consultation with a pain expert and searching of the grey literature yielded 38 articles. After  
36 initial screening, 291 articles were included for full-text review. Full-text review resulted in the  
37 inclusion of 33 articles for data extraction with excellent inter-rater reliability ( $\kappa= 0.83$  [95%CI  
38 0.71-0.91]). No unpublished studies were identified and included in the final analysis.

39 The 33 included studies represented 53,362 patients with publication dates ranging between 2002  
40 and 2017 (study characteristics of included studies are in Table 1).<sup>19 21-24 32-34 39-63</sup> Twenty-six  
41 studies were prospective cohort studies (79%), 5 were retrospective cohort studies (15%), and 2  
42  
43  
44  
45  
46  
47  
48  
49  
50  
51  
52  
53  
54  
55  
56  
57  
58  
59  
60

1  
2  
3 were cross-sectional studies (6.1%). Most studies were conducted in Europe (17/33 studies,  
4 51.5%), followed by Asia (8/33 studies, 24.2%). Studies involving a mixture of specialties  
5 (11/33 studies, 33.3%) and general surgery (10/33 studies, 30.3%) had the largest representation.  
6  
7 A variety of thresholds were used to define poor pain control on a standard 11-point scale (0-10)  
8 across studies; the most common definition of significant postoperative pain was  $\geq 4$  out of 10  
9 (13/33 studies, 39.4%) followed by  $>$  or  $\geq 5$  out of 10 (7/33 studies, 21.1%). NRS, VAS and  
10 VRS scale for pain was used in 57.6%, 42.4%, and 3.0% of studies respectively. The most  
11 common time-interval when postoperative pain was measured was between 24-48 hours (19/33  
12 studies, 57.6%). The mean number of exposures (including preoperative and perioperative  
13 variables) explored per study was 10.0 (SD: 5.73, range 1-19) (Table 1). There was a lack of  
14 dedicated prognostic studies evaluating predictors of postoperative pain control in most surgical  
15 sub-specialities including neurosurgery, spine surgery, otolaryngology and plastic surgery.  
16  
17  
18  
19  
20  
21  
22  
23  
24  
25  
26  
27  
28  
29  
30  
31  
32

### 33 *Assessment of Study Quality*

34  
35 The overall methodological quality of the included studies was generally high except for the use  
36 of a blinded outcome assessment (Figure 2). In 25 studies (76%), there was either no blinding or  
37 no reporting on whether there was blinding of exposures during outcome ascertainment. Twelve  
38 studies (36%) did not adjust for at least 3 potential confounders, 5 studies (15%) did not provide  
39 definitions of preoperative exposures, and 4 studies (12%) did not define how their sample was  
40 selected.  
41  
42  
43  
44  
45  
46  
47  
48  
49  
50

### 51 *Preoperative Predictors of Poor Postoperative Pain Control*

1  
2  
3 Of the 23 variables examined, 9 statistically significant preoperative predictors of poor  
4 postoperative pain control were found: younger age (OR 1.18 [95% CI 1.05-1.32]), female sex  
5 (OR 1.29 [95% CI 1.17-1.43]), smoking (OR 1.33 [95% CI 1.09-1.61]), history of depressive  
6 symptoms (OR 1.71 [95% CI 1.32-2.22]), history of anxiety symptoms (OR 1.22 [95% CI 1.09-  
7 1.36]), sleep difficulties (OR 2.32 [95% CI 1.46-3.69]), higher BMI as a continuous variable (OR  
8 1.02 [95% CI 1.01-1.03]), presence of preoperative pain (OR 1.21 [95% CI 1.10-1.32]), and use  
9 of preoperative analgesia (OR 1.54 [95% CI 1.18-2.03]). Pooled ORs and definition for each  
10 preoperative variable are shown in Table 2. Summary forest plots of significant preoperative  
11 predictors of poor postoperative pain control are presented in Figure 3. Significant heterogeneity  
12 was detected in 5 of these predictors (female sex, younger age, the presence of preoperative pain,  
13 history of anxiety symptoms, and smoking) with  $I^2$  values ranging from 50.4% to 82.4% (Table  
14 1). Detailed forest plots for each significant preoperative predictor are shown in online  
15 supplemental Figures S1 to S3.  
16  
17  
18  
19  
20  
21  
22  
23  
24  
25  
26  
27  
28  
29  
30  
31  
32  
33  
34

### 35 *Non-Significant Preoperative Predictors of Poor Postoperative Pain Control*

36 Fourteen predictors were not significant in the final analysis: pain catastrophizing scale  
37 (exaggerated negative perception to painful stimuli) as a dichotomous variable, marital status,  
38 high BMI as a dichotomous variable, any previous surgical history, orthopedic surgery compared  
39 to abdominal surgery, diabetes, pain catastrophizing as a continuous variable, higher education,  
40 age as a continuous variable, chronic pain, American Society of Anesthesiologists (ASA)  
41 Physical Status, alcohol use, preoperative pressure pain tolerance and low socioeconomic status  
42 (Table 2 and Figure 4).  
43  
44  
45  
46  
47  
48  
49  
50  
51  
52  
53  
54  
55  
56  
57  
58  
59  
60

1  
2  
3 Preoperative variables reported in only one study (and hence were excluded from the meta-  
4 analyses) included: patient weight, surgeon's anticipated pain level, self-assessment of good  
5 health, generalized self-efficacy scale, sedentary lifestyle, short portable mental status  
6 questionnaire, preoperative delirium (confusion assessment method), constipation, rectal volume,  
7  
8 body image scale, history of cancer, hypertension, heart disease, preoperative anemia,  
9  
10 anticonvulsant medication, home sedatives, electrical pain threshold, heat pain threshold, von  
11  
12 Frey pain intensity, blood type, preoperative 24 hour urinary cortisol level, thoracic surgery,  
13  
14 spine surgery, head & neck surgery, and total knee replacement.  
15  
16  
17  
18  
19  
20  
21  
22  
23

### 24 *Stratified Meta-Analysis and Meta-Regression*

25  
26 Stratified meta-analyses (according to the level of statistical adjustment, the definition of poor  
27 pain, surgical discipline, blinding of exposures, and location of pain assessment) showed no  
28 differences in the pooled estimates and therefore did not explain the significant level of  
29 heterogeneity observed between studies. These results were corroborated by meta-regression.  
30  
31 Repeating the analysis using least adjusted versus most adjusted models also found similar  
32 pooled results for each preoperative predictor.  
33  
34  
35  
36  
37  
38  
39  
40  
41  
42

### 43 **Discussion**

44  
45 In this systematic review and meta-analysis of 33 studies, we identified 9 preoperative predictors  
46 that were negatively associated with pain control after surgery: young age, female sex, smoking,  
47 history of depressive symptoms, history of anxiety symptoms, sleep difficulties, higher BMI,  
48 presence of preoperative pain, and use of preoperative analgesia. The most well-studied  
49 predictors were female sex (number of studies, n=20), young age (n=14), and the presence of  
50  
51  
52  
53  
54  
55  
56  
57  
58  
59  
60

1  
2  
3 preoperative pain (n=13). The strongest negative prognostic factors were a history of sleeping  
4 difficulties and depression, which were independently associated with approximately 2-fold  
5  
6 higher odds of poor postoperative pain control. Our findings are consistent with and extend the  
7  
8 results of the previous systematic review by Ip and colleagues.<sup>20</sup> In addition to the predictors  
9  
10 previously described, we identified 6 additional preoperative predictors of poor postoperative  
11  
12 pain control.<sup>20</sup>  
13  
14  
15  
16  
17  
18

19 Previous reports have been inconsistent in their conclusions regarding the association of female  
20 sex with worse pain prognosis after surgery.<sup>20 60</sup> Some have observed higher pain scores in  
21 females,<sup>47 50 53 54</sup> whereas others failed to find such a difference between sexes.<sup>34 57 59</sup> In this  
22  
23 meta-analysis, we found females had an approximately 30% increased odds of poor  
24  
25 postoperative pain control compared to males. Sex differences may potentially relate to complex  
26  
27 psychosocial and biological factors, such as an increased willingness of women to communicate  
28  
29 pain,<sup>64</sup> and subjective differences in pain perception and experience.<sup>20</sup> Indeed, females are  
30  
31 reported to require 11% greater doses of morphine on average compared to males in order to  
32  
33 achieve adequate postoperative analgesia.<sup>65</sup> Furthermore, younger age (as a dichotomous  
34  
35 variable) was found to be a significant predictor for poor postoperative pain control. When  
36  
37 examined as a continuous variable, the point estimate also suggested older age was protective  
38  
39 (e.g., for every decade of age, there was an associated 30% decrease in the odds for poor  
40  
41 postoperative pain control), though this association was not statistically significant. Notably,  
42  
43 studies examining age as a continuous variable may not have been able to detect a statistically  
44  
45 significant difference because the majority of these studies were restricted to older patients and  
46  
47 few examined younger subjects. Further, it is possible that the association between age and  
48  
49  
50  
51  
52  
53  
54  
55  
56  
57  
58  
59  
60

1  
2  
3 postoperative pain is non-linear. While sex and age are non-modifiable risk factors, this  
4  
5 knowledge can still be used to anticipate pain trajectories and individualize analgesia  
6  
7 requirements in the perioperative period.  
8  
9

10  
11  
12 Novel risk factors identified in this study included smoking, history of depressive symptoms,  
13  
14 preoperative analgesic use, and higher BMI. Smoking has been previously reported to be a  
15  
16 negative prognostic factor for pain control and a predictor of increased use of opioid analgesia.<sup>66</sup>

17  
18  
19 <sup>67</sup> Our finding implicating this modifiable risk factor in the setting of surgical pain supports the  
20  
21 undertaking of future interventional studies evaluating the impact of preoperative smoking  
22  
23 cessation programs on postoperative pain control. The presence of depression (whether self-  
24  
25 reported or measured with a validated scale) was also associated with worse pain outcomes.  
26  
27 Importantly, a wide spectrum of depression was represented by the included studies, and even  
28  
29 included subjects with relatively mild depressive symptoms.<sup>44</sup> Thus even mild or moderate levels  
30  
31 of depressive symptoms may be associated with an increased odds of poor postoperative pain  
32  
33 control. The use of preoperative analgesia, especially opioid therapy has been linked to poor  
34  
35 postoperative pain control in numerous studies.<sup>23 68</sup> This may be due to greater preoperative  
36  
37 severity of pain, opioid-induced hyperalgesia, and central or peripheral sensitization to pre-  
38  
39 existing nociception.<sup>23 69</sup> We found that every 5 kg/m<sup>2</sup> increase in BMI, was associated with a  
40  
41 10% higher odds of poor postoperative pain control (when BMI was examined as a continuous  
42  
43 variable), though studies examining BMI as a dichotomous variable were inadequately powered  
44  
45 to detect a statistical difference. The association between higher BMI levels and adverse pain  
46  
47 outcomes may be a product of inadequate dosing of postoperative analgesia and/or greater tissue  
48  
49 dissection in these patients leading to more postoperative pain.<sup>48</sup> Further research on the impact  
50  
51  
52  
53  
54  
55  
56  
57  
58  
59  
60



1  
2  
3 of modifying these risk factors in the pre- and peri-operative period is needed to determine its  
4  
5 effect on improving postoperative pain outcomes.  
6  
7  
8  
9

10 Surprisingly, there was no detectable association between chronic pain or pain catastrophizing  
11 symptoms and poor postoperative pain control. Tasmuth and colleagues<sup>70</sup> described the memory  
12 of pain as determined by many factors such as current pain intensity, emotion, the expectation of  
13 pain and recent peak intensity of previous pain. Intuitively, chronic pain and the tendency to  
14 misinterpret or exaggerate threatening situations might be expected by many to increase the risk  
15 of poor postoperative pain outcomes. However, that relationship was not observed in our review.  
16  
17  
18  
19  
20  
21  
22  
23  
24  
25

### 26 *Strengths & Limitations*

27  
28  
29  
30

31 The strengths of our study are the comprehensive search of the literature, inclusion of 33 articles  
32 (resulting in data on more than 53,000 patients), and the ability to generate pooled estimates for a  
33 large number of prognostic factors. The inclusion and stratification by multiple surgical  
34 specialties and the diversity of geographic locations increase the generalizability of the findings.  
35 However, the findings from the present report should be interpreted in the context of the study  
36 design. First, the primary studies included in our systematic review and meta-analysis were  
37 observational in nature. As is inherent to all observational designs, residual confounding cannot  
38 be excluded. This was particularly the case for unadjusted estimates. Nonetheless, we found that  
39 the most adjusted models yielded broadly similar results to the least adjusted estimates. In  
40 addition, there were a variety of thresholds used to categorize continuous preoperative variables  
41 between studies (e.g., young vs. old age) often reflecting diverse populations. Furthermore, the  
42  
43  
44  
45  
46  
47  
48  
49  
50  
51  
52  
53  
54  
55  
56  
57  
58  
59  
60

1  
2  
3 instruments used for outcome ascertainment, the definition of poor pain control, and the timing  
4  
5 of pain assessments often differed across studies. Future studies should attempt to standardize  
6  
7 definitions (common data elements) or present continuous data for ease of comparison between  
8  
9 studies. For significant predictors that were evaluated by a limited number of studies (e.g., sleep  
10  
11 difficulty), future studies should be performed to ensure reproducibility. We may have also been  
12  
13 underpowered to detect significant differences in certain predictors as we were limited by the  
14  
15 studies included. Finally, there was significant statistical heterogeneity between studies, which  
16  
17 could not be explained by stratified analysis or meta-regression based on a variety of clinical and  
18  
19 study design factors. This heterogeneity was likely a product of important clinical differences as  
20  
21 the included studies differed widely in surgery type and case-mix. Additional research may  
22  
23 further define the influence of specific surgical procedures on pain control.  
24  
25  
26  
27  
28  
29

## 30 **Conclusion**

31  
32  
33  
34  
35 In conclusion, we identified and described 9 predictors of poor postoperative pain control in  
36  
37 patients undergoing surgery requiring hospital admission. Early identification of predictors in  
38  
39 patients at risk of poor postoperative pain control may allow for more individualized  
40  
41 interventions, better pain management, and decrease reliance on pain medications (particularly  
42  
43 opioids). Increased awareness of these predictors can also aid in the development of personalized  
44  
45 discipline-specific clinical care pathways (e.g., multimodal analgesic strategies and enhanced  
46  
47 recovery after surgery programs) to reduce length of stay and perioperative medical  
48  
49 complications by improving postoperative pain outcomes. In addition, there is a lack of  
50  
51 dedicated research in certain specialties such as spine surgery, plastic surgery, and  
52  
53  
54  
55  
56  
57  
58  
59  
60

1  
2  
3 otolaryngology that should warrant further investigation. Future prospective (observational or  
4  
5 interventional) studies on acute postoperative pain control should consider addressing the  
6  
7 predictors found in this review.  
8  
9

### 10 11 12 **Acknowledgement** 13

14 We thank Dr. Diane Lorenzetti and Lorraine Toews for their assistance in developing the  
15  
16 electronic database search strategy and Dr. Kelly Shinkaruk for her assistance in our literature  
17  
18 search.  
19  
20  
21  
22  
23  
24  
25  
26  
27  
28  
29  
30  
31  
32  
33  
34  
35  
36  
37  
38  
39  
40  
41  
42  
43  
44  
45  
46  
47  
48  
49  
50  
51  
52  
53  
54  
55  
56  
57  
58  
59  
60

## References

1. Berry PH, Dahl JL. The new JCAHO pain standards: implications for pain management nurses. *Pain Manag Nurs* 2000;1(1):3-12. doi: 10.1053/jpmn.2000.5833 [published Online First: 2001/11/15]
2. Weiser TG, Regenbogen SE, Thompson KD, et al. An estimation of the global volume of surgery: a modelling strategy based on available data. *Lancet* 2008;372(9633):139-44. doi: 10.1016/S0140-6736(08)60878-8 [published Online First: 2008/06/28]
3. Ciol MA, Deyo RA, Howell E, et al. An Assessment of Surgery for Spinal Stenosis: Time Trends, Geographic Variations, Complications, and Reoperations. *Journal of the American Geriatrics Society* 1996;44(3):285-90. doi: 10.1111/j.1532-5415.1996.tb00915.x
4. Etzioni DA, Liu JH, Maggard MA, et al. The aging population and its impact on the surgery workforce. *Annals of surgery* 2003;238(2):170.
5. Total knee and hip replacement surgery projections show meteoric rise by 2030. Orthopaedic procedures set to continue gaining widespread acceptance as means to restore quality-of-life. Annual Meeting of the American Academy of Orthopaedic Surgery; 2006.
6. McCarty CA, Keeffe JE, Taylor HR. The need for cataract surgery: projections based on lens opacity, visual acuity, and personal concern. *British Journal of Ophthalmology* 1999;83(1):62-65.
7. Sosa JA, Wang TS, Yeo HL, et al. The maturation of a specialty: workforce projections for endocrine surgery. *Surgery* 2007;142(6):876-83.
8. Wu JM, Kawasaki A, Hundley AF, et al. Predicting the number of women who will undergo incontinence and prolapse surgery, 2010 to 2050. *American journal of obstetrics and gynecology* 2011;205(3):230. e1-30. e5.
9. Kalkman CJ, Visser K, Moen J, et al. Preoperative prediction of severe postoperative pain. *Pain* 2003;105(3):415-23. [published Online First: 2003/10/07]
10. Radinovic K, Markovic-Denic L, Jovanovic B, et al. Predictors of severe pain in the immediate postoperative period in elderly patients following hip fracture surgery. *Regional Anesthesia and Pain Medicine* 2016;41 (5 Supplement 1):e92. doi: <http://dx.doi.org/10.1097/AAP.0000000000000469>
11. Caumo W, Broenstrup JC, Fialho L, et al. Risk factors for postoperative anxiety in children. *Acta Anaesthesiologica Scandinavica* 2000;44(7):782-9.
12. Sommer M, de Rijke JM, van Kleef M, et al. The prevalence of postoperative pain in a sample of 1490 surgical inpatients. *European journal of anaesthesiology* 2008;25(4):267-74. doi: 10.1017/s0265021507003031 [published Online First: 2007/12/07]
13. Peters CL, Shirley B, Erickson J. The effect of a new multimodal perioperative anesthetic regimen on postoperative pain, side effects, rehabilitation, and length of hospital stay after total joint arthroplasty. *The Journal of arthroplasty* 2006;21(6):132-38.
14. Sriwatanakul K, Weis OF, Alloza JL, et al. Analysis of narcotic analgesic usage in the treatment of postoperative pain. *JAMA* 1983;250(7):926-9. [published Online First: 1983/08/19]

15. Katz J, Jackson M, Kavanagh BP, et al. Acute pain after thoracic surgery predicts long-term post-thoracotomy pain. *Clin J Pain* 1996;12(1):50-5. [published Online First: 1996/03/01]
16. Lynch EP, Lazor MA, Gellis JE, et al. The impact of postoperative pain on the development of postoperative delirium. *Anesth Analg* 1998;86(4):781-5. [published Online First: 1998/04/16]
17. Perttunen K, Tasmuth T, Kalso E. Chronic pain after thoracic surgery: a follow-up study. *Acta Anaesthesiol Scand* 1999;43(5):563-7. [published Online First: 1999/05/26]
18. Zheng H, Schnabel A, Yahiaoui-Doktor M, et al. Age and preoperative pain are major confounders for sex differences in postoperative pain outcome: A prospective database analysis. *PLoS ONE* 2017;12 (6) (no pagination)(e0178659) doi: <http://dx.doi.org/10.1371/journal.pone.0178659>
19. Rehberg B, Mathivon S, Combescure C, et al. Prediction of acute postoperative pain following breast cancer surgery using the pain sensitivity questionnaire a cohort study. *Clinical Journal of Pain* 2017;33(1):57-66. doi: <http://dx.doi.org/10.1097/AJP.0000000000000380>
20. Ip HY, Abrishami A, Peng PW, et al. Predictors of postoperative pain and analgesic consumption: a qualitative systematic review. *Anesthesiology* 2009;111(3):657-77. doi: 10.1097/ALN.0b013e3181aae87a [published Online First: 2009/08/13]
21. Gorkem U, Togrtogrul C, Sahiner Y, et al. Preoperative anxiety may increase postcesarean delivery pain and analgesic consumption. *Minerva Anesthesiol* 2016;82(9):974-80.
22. Katz J, Poleshuck EL, Andrus CH, et al. Risk factors for acute pain and its persistence following breast cancer surgery. *Pain* 2005;119(1-3):16-25. doi: <https://dx.doi.org/10.1016/j.pain.2005.09.008>
23. Liu SS, Buvanendran A, Rathmell JP, et al. Predictors for moderate to severe acute postoperative pain after total hip and knee replacement. *Int Orthop* 2012;36(11):2261-7. doi: <https://dx.doi.org/10.1007/s00264-012-1623-5>
24. Nishimura D, Kosugi S, Onishi Y, et al. Psychological and endocrine factors and pain after mastectomy. *Eur J Pain* 2017;21(7):1144-53. doi: <https://dx.doi.org/10.1002/ejp.1014>
25. Stroup DF, Berlin JA, Morton SC, et al. Meta-analysis of observational studies in epidemiology: a proposal for reporting. Meta-analysis Of Observational Studies in Epidemiology (MOOSE) group. *JAMA* 2000;283(15):2008-12. [published Online First: 2000/05/02]
26. Shamseer L, Moher D, Clarke M, et al. Preferred reporting items for systematic review and meta-analysis protocols (PRISMA-P) 2015: elaboration and explanation. *Bmj* 2015;350:g7647. doi: 10.1136/bmj.g7647 [published Online First: 2015/01/04]
27. Liberati A, Altman DG, Tetzlaff J, et al. The PRISMA statement for reporting systematic reviews and meta-analyses of studies that evaluate health care interventions: explanation and elaboration. *Journal of clinical epidemiology* 2009;62(10):e1-34. doi: 10.1016/j.jclinepi.2009.06.006 [published Online First: 2009/07/28]
28. McGowan J, Sampson M, Salzwedel DM, et al. PRESS Peer Review of Electronic Search Strategies: 2015 Guideline Statement. *Journal of clinical epidemiology* 2016;75:40-6. doi: 10.1016/j.jclinepi.2016.01.021 [published Online First: 2016/03/24]
29. Altman DG. Systematic reviews of evaluations of prognostic variables. *Bmj* 2001;323(7306):224-8. [published Online First: 2001/07/28]

- 1
  - 2
  - 3
  - 4
  - 5
  - 6
  - 7
  - 8
  - 9
  - 10
  - 11
  - 12
  - 13
  - 14
  - 15
  - 16
  - 17
  - 18
  - 19
  - 20
  - 21
  - 22
  - 23
  - 24
  - 25
  - 26
  - 27
  - 28
  - 29
  - 30
  - 31
  - 32
  - 33
  - 34
  - 35
  - 36
  - 37
  - 38
  - 39
  - 40
  - 41
  - 42
  - 43
  - 44
  - 45
  - 46
  - 47
  - 48
  - 49
  - 50
  - 51
  - 52
  - 53
  - 54
  - 55
  - 56
  - 57
  - 58
  - 59
  - 60
30. Egger M, Davey-Smith G, Altman D. Systematic reviews in health care: meta-analysis in context: John Wiley & Sons 2008.
31. Katz J, Melzack R. Measurement of pain. *Surg Clin North Am* 1999;79(2):231-52. [published Online First: 1999/06/03]
32. Jae Chul K, Jinae L, So Yeon K, et al. Postoperative Pain and Intravenous Patient-Controlled Analgesia-Related Adverse Effects in Young and Elderly Patients: A Retrospective Analysis of 10,575 Patients. *Medicine (Baltimore)* 2015;94(45):1-7. doi: 10.1097/MD.0000000000002008
33. Persson AKM, Dyrehag LE, Akeson J. Prediction of postoperative pain from electrical pain thresholds after laparoscopic cholecystectomy. *Clinical Journal of Pain* 2017;33(2):126-31. doi: <http://dx.doi.org/10.1097/AJP.0000000000000394>
34. Rakel BA, Blodgett NP, Bridget Zimmerman M, et al. Predictors of postoperative movement and resting pain following total knee replacement. *Pain* 2012;153(11):2192-203. doi: <https://dx.doi.org/10.1016/j.pain.2012.06.021>
35. Higgins JP, Thompson SG, Deeks JJ, et al. Measuring inconsistency in meta-analyses. *Bmj* 2003;327(7414):557-60. doi: 10.1136/bmj.327.7414.557 [published Online First: 2003/09/06]
36. Laupacis A, Wells G, Richardson WS, et al. Users' guides to the medical literature. V. How to use an article about prognosis. Evidence-Based Medicine Working Group. *JAMA* 1994;272(3):234-7. [published Online First: 1994/07/20]
37. Hayden JA, Cote P, Bombardier C. Evaluation of the quality of prognosis studies in systematic reviews. *Ann Intern Med* 2006;144(6):427-37. [published Online First: 2006/03/22]
38. Zhang J, Kai FY. What's the relative risk?: A method of correcting the odds ratio in cohort studies of common outcomes. *Jama* 1998;280(19):1690-91.
39. Alves ML, Vieira JE, Mathias LA, et al. Preoperative coping mechanisms have no predictive value for postoperative pain in breast cancer. *Rev Bras Psiquiatr* 2013;35(4):364-8. doi: <https://dx.doi.org/10.1590/1516-4446-2012-0934>
40. Aubrun F, Valade N, Coriat P, et al. Predictive factors of severe postoperative pain in the postanesthesia care unit. 2008;106(5):1535-41, table of contents. doi: <https://dx.doi.org/10.1213/ane.0b013e318168b2ce>
41. Baudic S, Jayr C, Albi-Feldzer A, et al. Effect of Alexithymia and Emotional Repression on Postsurgical Pain in Women With Breast Cancer: A Prospective Longitudinal 12-Month Study. *J Pain* 2016;17(1):90-100. doi: 10.1016/j.jpain.2015.10.001
42. Belii N, Moghildea V, Sandru S, et al. Anxiety, but not pain catastrophizing, represents a risk factor for severe acute postoperative pain: A prospective, observational, cohort study. *Jurnalul Roman de Anestezie Terapie Intensiva/Romanian Journal of Anaesthesia and Intensive Care* 2014;21(1):19-26.
43. Borges NC, Pereira LV, de Moura LA, et al. Predictors for Moderate to Severe Acute Postoperative Pain after Cesarean Section. *Pain Res Manag* 2016;2016:5783817. doi: <https://dx.doi.org/10.1155/2016/5783817>
44. Caumo W, Schmidt AP, Schneider CN, et al. Preoperative predictors of moderate to intense acute postoperative pain in patients undergoing abdominal surgery. *Acta Anaesthesiologica Scandinavica* 2002;46(10):1265-71.

- 1
- 2
- 3
- 4 45. Duan G, Guo S, Zhang Y, et al. Effects of Epidemiological Factors and Pressure Pain
- 5 Measurements in Predicting Postoperative Pain: A Prospective Survey of 1,002 Chinese
- 6 Patients. *Pain physician* 2017;20(6):E903-E14.
- 7 46. Genov PG, Smirnova OV, Glushchenko NS, et al. Predicting of postoperative pain level and
- 8 morphine consumption by preoperative pressure pain assessment in patients before
- 9 elective surgery. [Russian]. *Anesteziol Reanimatol* 2015;60(1):11-16.
- 10 47. Gerbershagen HJ, Pogatzki-Zahn E, Aduckathil S, et al. Procedure-specific risk factor
- 11 analysis for the development of severe postoperative pain. *Anesthesiology*
- 12 2014;120(5):1237-45. doi: <https://dx.doi.org/10.1097/ALN.000000000000108>
- 13 48. Jasim HA, Sulaiman SABS, Khan Ah, et al. Factors affecting post caesarean pain intensity
- 14 among women in the northern peninsular of Malaysia. *Journal of Clinical and Diagnostic*
- 15 *Research* 2017;11(9):IC07-IC11. doi: <http://dx.doi.org/10.7860/JCDR/2017/25364.10630>
- 16 49. Kim S, Jung S, Choe J, et al. Predictive Factors for Pain After Endoscopic Resection of
- 17 Gastric Tumors. *Dig Dis Sci* 2016;61(12):3560-64. doi: 10.1007/s10620-016-4325-9
- 18 50. Lesin M, Lozo MD, Duplancic-Sundov Z, et al. Risk factors associated with postoperative
- 19 pain after ophthalmic surgery: A prospective study. *Therapeutics and Clinical Risk*
- 20 *Management* 2016;12:93-102. doi: <http://dx.doi.org/10.2147/TCRM.S97024>
- 21 51. Lunn TH, Gaarn-Larsen L, Kehlet H. Prediction of postoperative pain by preoperative pain
- 22 response to heat stimulation in total knee arthroplasty. *Pain* 2013;154(9):1878-85. doi:
- 23 <https://dx.doi.org/10.1016/j.pain.2013.06.008>
- 24 52. Mamie C, Bernstein M, Morabia A, et al. Are there reliable predictors of postoperative pain?
- 25 *Acta Anaesthesiologica Scandinavica* 2004;48(2):234-42. doi:
- 26 <http://dx.doi.org/10.1111/j.0001-5172.2004.00298.x>
- 27 53. Mei W, Seeling M, Franck M, et al. Independent risk factors for postoperative pain in need of
- 28 intervention early after awakening from general anaesthesia. *Eur J Pain* 2010;14(2):e1-
- 29 e7. doi: <http://dx.doi.org/10.1016/j.ejpain.2009.03.009>
- 30 54. Murray AA, Retief FW. Acute postoperative pain in 1 231 patients at a developing country
- 31 referral hospital: Incidence and risk factors. *Southern African Journal of Anaesthesia and*
- 32 *Analgesia* 2016;22(1):26-31. doi: <http://dx.doi.org/10.1080/22201181.2015.1115608>
- 33 55. Orbach-Zinger S, Fireman S, Ben-Haroush A, et al. Preoperative sleep quality predicts
- 34 postoperative pain after planned caesarean delivery. *European Journal of Pain (United*
- 35 *Kingdom)* 2017;21(5):787-94. doi: <http://dx.doi.org/10.1002/ejp.980>
- 36 56. Petrovic NM, Milovanovic DR, Ignjatovic Ristic D, et al. Factors associated with severe
- 37 postoperative pain in patients with total hip arthroplasty. *Acta Orthop Traumatol Turc*
- 38 2014;48(6):615-22. doi: <https://dx.doi.org/10.3944/AOTT.2014.14.0177>
- 39 57. Radinovic K, Milan Z, Markovic-Denic L, et al. Predictors of severe pain in the immediate
- 40 postoperative period in elderly patients following hip fracture surgery. *Injury*
- 41 2014;45(8):1246-50. doi: <https://dx.doi.org/10.1016/j.injury.2014.05.024>
- 42 58. Robleda G, Sillero-Sillero A, Puig T, et al. Influence of preoperative emotional state on
- 43 postoperative pain following orthopedic and trauma surgery. *Revista Latino-Americana*
- 44 *de Enfermagem (RLAE)* 2014;22(5):785-91. doi: 10.1590/0104-1169.0118.2481
- 45 59. Sanansilp V, Dejarkom S, Deetayart S. Postoperative pain management and the risk factors
- 46 in major operation: A baseline study of acute pain service, Siriraj Hospital. *J Med Assoc*
- 47 *Thai* 2016;99(5):549-56.
- 48
- 49
- 50
- 51
- 52
- 53
- 54
- 55
- 56
- 57
- 58
- 59
- 60

- 1  
2  
3  
4  
5  
6  
7  
8  
9  
10  
11  
12  
13  
14  
15  
16  
17  
18  
19  
20  
21  
22  
23  
24  
25  
26  
27  
28  
29  
30  
31  
32  
33  
34  
35  
36  
37  
38  
39  
40  
41  
42  
43  
44  
45  
46  
47  
48  
49  
50  
51  
52  
53  
54  
55  
56  
57  
58  
59  
60
60. Sommer M, de Rijke JM, van Kleef M, et al. Predictors of acute postoperative pain after elective surgery. *Clinical Journal of Pain* 2010;26(2):87-94. doi: <https://dx.doi.org/10.1097/AJP.0b013e3181b43d68>
  61. Storesund A, Krukhaug Y, Olsen MV, et al. Females report higher postoperative pain scores than males after ankle surgery. *Scand J Pain* 2016;12:85-93. doi: <https://dx.doi.org/10.1016/j.sjpain.2016.05.001>
  62. Tighe PJ, Riley JL, 3rd, Fillingim RB. Sex differences in the incidence of severe pain events following surgery: a review of 333,000 pain scores. *Pain Med* 2014;15(8):1390-404. doi: <https://dx.doi.org/10.1111/pme.12498>
  63. Zhao Y, Ding JH, Yin SH, et al. Predictors of early postoperative pain after stapled haemorrhoidopexy. *Colorectal Dis* 2014;16(6):O206-11. doi: <https://dx.doi.org/10.1111/codi.12531>
  64. Barsky AJ, Peekna HM, Borus JF. Somatic symptom reporting in women and men. *J Gen Intern Med* 2001;16(4):266-75. [published Online First: 2001/04/25]
  65. Aubrun F, Salvi N, Coriat P, et al. Sex- and age-related differences in morphine requirements for postoperative pain relief. *Anesthesiology* 2005;103(1):156-60. [published Online First: 2005/06/29]
  66. Chiang HL, Chia YY, Lin HS, et al. The Implications of Tobacco Smoking on Acute Postoperative Pain: A Prospective Observational Study. *Pain Res Manag* 2016;2016:9432493. doi: 10.1155/2016/9432493 [published Online First: 2016/07/23]
  67. Creekmore FM, Lugo RA, Weiland KJ. Postoperative opiate analgesia requirements of smokers and nonsmokers. *Ann Pharmacother* 2004;38(6):949-53. doi: 10.1345/aph.1D580 [published Online First: 2004/04/29]
  68. Kampe S, Wendland M, Welter S, et al. Independent Predictors for Higher Postoperative Pain Intensity During Recovery After Open Thoracic Surgery: A Retrospective Analysis in 621 Patients. *Pain Med* 2017:pnx238-pnx38. doi: 10.1093/pm/pnx238
  69. Angst MS, Clark JD. Opioid-induced hyperalgesia: a qualitative systematic review. *Anesthesiology* 2006;104(3):570-87. [published Online First: 2006/03/02]
  70. Tasmuth T, Estlanderb AM, Kalso E. Effect of present pain and mood on the memory of past postoperative pain in women treated surgically for breast cancer. *Pain* 1996;68(2-3):343-7. [published Online First: 1996/12/01]



**Table 1. Study characteristics of included studies.**

| Author, Year                      | Country of Origin | Sample Size | Mean Age in Years (SD)               | Study Design | Setting of Pain Assessment | Pain Scale* | Definition of Poor Pain     | Time of Assessment <sup>d</sup> | Specialty  | Pathology                             | No. of Exposures Examined |
|-----------------------------------|-------------------|-------------|--------------------------------------|--------------|----------------------------|-------------|-----------------------------|---------------------------------|------------|---------------------------------------|---------------------------|
| Alves et al, 2013                 | Brazil            | 139         | 51.7 (11.8)                          | PCS          | Ward                       | VAS         | >30                         | 24                              | GS         | Breast cancer                         | 3                         |
| Auburn et al, 2008                | France            | 342         | 48 (18)                              | PCS          | PACU                       | VAS & NRS   | Morphine >0.15mg/kg in PACU | <24 hours                       | Mixed      | Mixed                                 | 3                         |
| Baudic et al, 2016                | France            | 100         | 55.2 (12.1)                          | PCS          | Ward                       | BPI         | ≥3                          | 48                              | GS         | Breast cancer                         | 9                         |
| Belii et al, 2014                 | Moldolva          | 176         | Not stated                           | PCS          | Ward                       | NRS         | ≥5                          | 24                              | GS         | Abdominal pathologies                 | 3                         |
| Borges et al, 2016                | Brazil            | 1062        | 25.1 (5.7)                           | PCS          | Ward                       | NRS         | ≥5                          | Immediate postoperative period  | Obstetric  | Non-emergent cesarean section         | 14                        |
| Camuo et al, 2012                 | Brazil            | 346         | 44.3 (9.6)                           | PCS          | PACU                       | VAS         | >30                         | 24                              | GS         | Abdominal pathologies                 | 15                        |
| Duan et al, 2017                  | China             | 1002        | 49.5 (11.6)                          | PCS          | Ward                       | NRS         | ≥4                          | 24                              | Mixed      | Mixed                                 | 3                         |
| Genov et al, 2015                 | Russia            | 321         | Not stated                           | RCS          | PACU                       | VAS         | >4                          | 12                              | Mixed      | Mixed                                 | 1                         |
| Gerbershagen et al, 2014          | Netherland        | 22963       | 55.2 <sup>a</sup>                    | PCS          | Ward                       | NRS         | ≥7                          | 24                              | Mixed      | Mixed                                 | 3                         |
| Gorkem et al, 2016                | Turkey            | 80          | 29.7 (5.8)                           | PCS          | Ward                       | VAS         | >40                         | 18                              | Obstetric  | Non-emergent cesarean section         | 16                        |
| Jae Chul et al, 2015 <sup>c</sup> | Korea             | 10,575      | Young: 31.8 (5.8)<br>Old: 74.8 (4.4) | RCS          | Ward                       | NRS         | >4                          | 48                              | Mixed      | Mixed                                 | 5                         |
| Jasim et al, 2017                 | Malaysia          | 400         | 30.4 (4.8)                           | RCS          | PACU and Ward              | VAS         | Not stated                  | 12                              | Obstetric  | Non-emergent cesarean section         | 7                         |
| Katz et al, 2005                  | United States     | 109         | 58.2 (12)                            | PCS          | Ward                       | NRS         | ≥5                          | 48                              | GS         | Breast cancer                         | 17                        |
| Kim et al, 2016                   | United Kingdom    | 156         | 64.4 (10.9)                          | PCS          | Ward                       | NRS         | ≥5                          | 48                              | GS         | Gastric tumors (endoscopic resection) | 11                        |
| Lesin et al, 2016                 | Croatia           | 226         | 67 (13)                              | PCS          | Ward                       | NRS         | ≥5                          | 6                               | Ophtho     | Ophthalmologic pathologies            | 19                        |
| Liu et al, 2012 <sup>c</sup>      | United States     | 897         | 67 (11)                              | CSS          | Ward                       | NRS & NRS   | >4                          | 24                              | Orthopedic | Primary total hip or knee             | 17                        |

|                                  |               |      |                                                          |     |      |            | with activity VAS (activity) |                  |            |                                      | replacement |  |
|----------------------------------|---------------|------|----------------------------------------------------------|-----|------|------------|------------------------------|------------------|------------|--------------------------------------|-------------|--|
| Lunn et al, 2013                 | Denmark       | 92   | Median 66 (IQR:13)                                       | PCS | Ward |            | ≥60                          | 6-24             | Orthopedic | Total knee arthroplasty              | 4           |  |
| Mamie et al, 2004                | Switzerland   | 304  | 45 <sup>a</sup>                                          | PCS | Ward | VAS        | >5                           | 24               | Mixed      | Abdominal and orthopedic pathologies | 10          |  |
| Mei et al, 2010                  | Germany       | 1736 | Not stated                                               | PCS | PACU | NRS        | >4                           | After extubation | Mixed      | Mixed                                | 10          |  |
| Murray et al, 2016               | South Africa  | 1231 | 44 <sup>b</sup>                                          | PCS | Ward | VAS        | >40                          | 24               | Mixed      | Mixed                                | 8           |  |
| Nishimura et al 2017             | Japan         | 64   | 60 (11)                                                  | PCS | Ward | VAS        | >40                          | 6-60             | GS         | Partial mastectomy for cancer        | 8           |  |
| Orbach-Zinger, et al 2016        | Israel        | 245  | Good sleeper: 34.9 (4.9)<br>Poor sleeper: 34.1 (4.9)     | PCS | Ward | VRS        | >7                           | 24               | Obstetric  | Non-emergent cesarean section        | 3           |  |
| Persson et al, 2017 <sup>c</sup> | Sweden        | 152  | Median 49 (IQR: 29)                                      | PCS | PACU | VAS        | >40                          | 1.5              | GS         | Laparoscopic cholecystectomy         | 2           |  |
| Petrovic et al, 2014             | Serbia        | 90   | High pain group: 64.2 (3.8),<br>Low pain group: 69 (3.9) | PCS | Ward | NRS        | ≥5                           | 12               | Orthopedic | Total hip arthroplasty               | 15          |  |
| Radinovic et al, 2014            | Serbia        | 234  | 71.2 (8.3)                                               | PCS | PACU | NRS        | ≥7                           | 1                | Orthopedic | Hip fractures                        | 14          |  |
| Rakel et al, 2012 <sup>c</sup>   | United States | 215  | 61.7 (9.8)                                               | PCS | Ward | NRS (0-21) | 8-14 (mod)<br>15-20 (severe) | 48               | Orthopedic | Total knee arthroplasty              | 17          |  |
| Rehberg et al, 2017              | Switzerland   | 198  | 57.5 (12.5)                                              | PCS | Ward | NRS        | >3                           | 24               | GS         | Breast cancer                        | 15          |  |

|                       |               |      |                                                     |     |               |             |          |                                 |            |                                 |    |
|-----------------------|---------------|------|-----------------------------------------------------|-----|---------------|-------------|----------|---------------------------------|------------|---------------------------------|----|
| Robleda et al, 2014   | Spain         | 127  | 71.0 (18)                                           | RCS | PACU          | NRS         | $\geq 4$ | Immediate in PACU               | Orthopedic | Femur fractures and prosthetics | 15 |
| Sananslip et al, 2016 | Thailand      | 340  | 54.8 (17.8)                                         | PCS | Ward          | NRS         | $\geq 4$ | 24-48                           | Mixed      | Mixed                           | 12 |
| Sommer et al, 2010    | Netherlands   | 1300 | 56 (15.5)                                           | PCS | Ward          | VAS         | $>40$    | 24                              | Mixed      | Mixed                           | 15 |
| Storesund et al, 2016 | Norway        | 336  | 52 <sup>b</sup>                                     | CSS | PACU          | VAS or vNRS | $\geq 4$ | At time of transfer out of PACU | Orthopedic | Ankle fractures                 | 15 |
| Tighe et al, 2014     | United States | 7731 | Female: 56.4 <sup>b</sup><br>Male 56.6 <sup>b</sup> | RCS | Ward          | NRS         | $\geq 7$ | 24                              | Mixed      | Mixed                           | 1  |
| Zhao et al, 2014      | China         | 73   | Median 43 (IQR:57)                                  | PCS | PACU and Ward | VAS         | $>30$    | 24                              | GS         | Hemorrhoids                     | 12 |

\*Pain measured at rest, unless otherwise stated

<sup>a</sup> Authors' estimate (study only included age ranges)

<sup>b</sup> Variance not stated

<sup>c</sup> Studies which divided their dataset into two groups when evaluating predictors: Jae Chul et al: young vs old age group; Liu et al: NRS at rest vs with activity; Persson et al: female vs male; Rakel et al: moderate vs severe pain outcome.

<sup>d</sup> Time of assessment measured in hours.

BPI- Brief pain index (0-10), VAS- Visual Analogue Scale for Pain (0-100mm), NRS- Numeric Rating Scale for Pain (0-10), vNRS- Verbal Numeric, Rating Scale for Pain (0-10), Mixed- more than one specialty or pathology, PCS- Prospective Cohort Study, CSS-Cross Sectional Study, RCS-Retrospective Cohort Study and GS- General Surgery

**Table 2. Pooled odds ratios and definitions of preoperative predictors of poor postoperative pain control.**

| Preoperative predictor                  | No. of studies included in pooled estimate | Odds ratio (95% CI) | p-value | I <sup>2</sup> statistic | Definition                                                                                                                                                                                                    |
|-----------------------------------------|--------------------------------------------|---------------------|---------|--------------------------|---------------------------------------------------------------------------------------------------------------------------------------------------------------------------------------------------------------|
| Younger age                             | 14                                         | 1.18 (1.05 to 1.32) | <0.001  | 79.7%*                   | Authors' cutoff (range ≤31 to <70 years)                                                                                                                                                                      |
| Females sex                             | 20                                         | 1.29 (1.17 to 1.43) | <0.001  | 71%*                     | Female sex                                                                                                                                                                                                    |
| Smoking                                 | 9                                          | 1.33 (1.09 to 1.61) | 0.005   | 55.8%*                   | Self-reported (any amount)                                                                                                                                                                                    |
| History of depressive symptoms          | 8                                          | 1.71 (1.32 to 2.21) | 0.018   | 12.6%                    | Self-reported, any use of antidepressants or at least moderate score on depression scale (Hamilton Depression Rating Scale ≥19, Montgomery-Asberg Depression Rating Scale >13, Geriatric Depression Scale >6) |
| History of anxiety symptoms             | 10                                         | 1.22 (1.09 to 1.36) | 0.001   | 82.4%*                   | Self-reported or moderate to severe score on anxiety scale (State Anxiety Inventory ≥30 to >46, Hamilton Anxiety Scale ≥25, Numeric Rating Scale for Anxiety ≥5)                                              |
| Sleep difficulty                        | 2                                          | 2.32 (1.46 to 3.69) | <0.001  | 0%                       | Self-reported chronic sleep difficulties or score >5 on the Pittsburg Sleep Quality Index                                                                                                                     |
| BMI (continuous)                        | 2                                          | 1.02 (1.01 to 1.03) | <0.001  | 0%                       | BMI as a continuous variable                                                                                                                                                                                  |
| Presence of preoperative pain           | 13                                         | 1.21 (1.10-1.32)    | <0.001  | 50.4%*                   | Self-reported, any preoperative pain                                                                                                                                                                          |
| Preoperative analgesia use              | 6                                          | 1.54 (1.18 to 2.03) | 0.002   | 44.0%                    | Self-reported use of preoperative analgesia or opioids                                                                                                                                                        |
| Age (continuous)                        | 9                                          | 0.97 (0.93 to 1.01) | 0.16    | 93.5%*                   | Age as a continuous variable                                                                                                                                                                                  |
| Higher education                        | 8                                          | 0.97 (0.69 to 1.38) | 0.89    | 43.4%                    | Authors' cutoff from self-reported levels of education (range: >9 years of education to college or postgraduate degree)                                                                                       |
| History of surgery                      | 8                                          | 1.15 (0.97 to 1.37) | 0.10    | 33.9%                    | Any self-reported previous surgical history                                                                                                                                                                   |
| Alcohol use                             | 5                                          | 0.89 (0.72 to 1.11) | 0.29    | 26.2%                    | Self-reported alcohol use (range from any to dependence)                                                                                                                                                      |
| Low ASA physical status                 | 5                                          | 0.94 (0.59 to 1.51) | 0.80    | 79.0%*                   | ASA I compared to II or III                                                                                                                                                                                   |
| High BMI (dichotomous)                  | 5                                          | 1.23 (0.98 to 1.55) | 0.069   | 66.5%*                   | Authors' cutoff (range from >30 to >40 kg/m <sup>2</sup> )                                                                                                                                                    |
| Chronic pain                            | 4                                          | 0.96 (0.65 to 1.42) | 0.84    | 59.5%                    | Self-reported chronic pain                                                                                                                                                                                    |
| Diabetes                                | 4                                          | 1.02 (0.73 to 1.42) | 0.90    | 0%                       | Self-reported history of diabetes                                                                                                                                                                             |
| Pain catastrophizing scale (continuous) | 4                                          | 1.02 (0.98 to 1.05) | 0.37    | 64.8%*                   | Pain Catastrophizing Scale scores as a continuous variable                                                                                                                                                    |

|                                          |   |                     |      |        |                                                                                                                                                              |
|------------------------------------------|---|---------------------|------|--------|--------------------------------------------------------------------------------------------------------------------------------------------------------------|
| Marital status                           | 3 | 1.42 (0.62 to 3.23) | 0.41 | 60.1%  | Self-reported as single or not married                                                                                                                       |
| Orthopedic procedure                     | 3 | 1.06 (0.72 to 1.57) | 0.77 | 76.3%* | Orthopedic procedure compared to abdominal surgery                                                                                                           |
| Preoperative pressure pain tolerance     | 3 | 0.85 (0.69 to 1.06) | 0.14 | 81.0%* | Preoperative pressure pain tolerance as measured by Wagner Force Ten Digital Force Gage FPX 50 or hand-held pressure algometer (Somedic AB, Farsta, Sweden). |
| Low socioeconomic status                 | 2 | 0.85 (0.49 to 1.47) | 0.56 | 0%     | Brazilian Economic Classification Criteria Classes D or E or monthly family net income less than 750 US dollars                                              |
| Pain catastrophizing scale (dichotomous) | 2 | 1.47 (0.67 to 3.22) | 0.34 | 73.0%  | Authors' cutoff (range from $\geq$ or $>15$ )                                                                                                                |

\*significant Cochran Q test ( $p < 0.05$ )

BMI- body mass index ( $\text{kg}/\text{m}^2$ )

ASA- American Society of Anesthesiologist

CI- confidence interval

## Figure Legends

**Figure 1. Systematic Review & Meta-Analysis Flow Diagram.** All database and grey literature search was performed on October 13<sup>th</sup>, 2017.

**Figure 2. Assessment of study quality.** 1: adequate description of population, 2: non-biased selection, 3: adequate exposure measurement, 4: adequate outcome measurement, 5: blinded outcome assessment (to exposure), 6: adequate statistical adjustment, 7: precision of results, 8: reference standard, and 9: low loss to follow up. Green: low-risk of bias, yellow: unclear-risk of bias, red: high-risk of bias.

**Figure 3. Summary forest plot for significant preoperative predictors of poor postoperative pain control.** Odds ratios are shown with 95 percent confidence intervals. The number of studies included in the meta-analysis for each predictor is indicated.

**Figure 4. Summary forest plot for non-significant preoperative predictors of poor postoperative pain control.** Odds ratios are shown with 95 percent confidence intervals. The number of studies included in the meta-analysis for each predictor is indicated.

**Figure S1. Forest Plot of Preoperative Predictors of Postoperative Pain.** a) female sex b) younger age, and c) smoking history.

**Figure S2. Forest Plot of Significant Preoperative Predictors of Postoperative Pain.** a) history of depression symptoms, b) presence of preoperative pain, and c) history of anxiety symptoms.

1  
2  
3  
4  
5  
6  
7  
8  
9  
10  
11  
12  
13  
14  
15  
16  
17  
18  
19  
20  
21  
22  
23  
24  
25  
26  
27  
28  
29  
30  
31  
32  
33  
34  
35  
36  
37  
38  
39  
40  
41  
42  
43  
44  
45  
46  
47  
48  
49  
50  
51  
52  
53  
54  
55  
56  
57  
58  
59  
60

**Figure S3. Forest Plot of Significant Preoperative Predictors of Postoperative Pain.** a) preoperative analgesia, b) body mass index (continuous), and c) history of sleeping difficulty.

For peer review only

1  
2 **Table Legend**  
3  
4  
5  
6

7 **Table 1. Study characteristics of included studies.**  
8  
9

10  
11  
12 **Table 2. Pooled odds ratios and definitions of preoperative predictors of poor postoperative pain**  
13 **control.**  
14  
15

16  
17  
18 **Table S1. Quality indicators for studies of prognosis.**<sup>35</sup>  
19  
20  
21  
22  
23  
24  
25  
26  
27  
28  
29  
30  
31  
32  
33  
34  
35  
36  
37  
38  
39  
40  
41  
42  
43  
44  
45  
46  
47  
48  
49  
50  
51  
52  
53  
54  
55  
56  
57  
58  
59  
60



1  
2  
3  
4  
5  
6  
7  
8  
9  
10  
11  
12  
13  
14  
15  
16  
17  
18  
19  
20  
21  
22  
23  
24  
25  
26  
27  
28  
29  
30  
31  
32  
33  
34  
35  
36  
37  
38  
39  
40  
41  
42  
43  
44  
45  
46  
47  
48  
49  
50  
51  
52  
53  
54  
55  
56  
57  
58  
59  
60

**Appendix Legend**

**Appendix S1. Database Search Strategy.** Themes were combined with Boolean operator “and” and within-theme were combined with Boolean operator “or”.

For peer review only

## Author Statement

All authors satisfy the requirement for authorship as per ICMJE.

MMY: conception and design of work; acquisition, analysis and interpretation of data; drafting initial draft of manuscript; critical review and final approval of manuscript.

RLH: design of work; acquisition, analysis and interpretation of data; critical review and final approval of manuscript.

AAL: design of work; analysis and interpretation of data; critical review and final approval of manuscript.

PER: design of work; analysis and interpretation of data; critical review and final approval of manuscript.

NJ: design of work; interpretation of data; critical review and final approval of manuscript.

SC: design of work; interpretation of data; critical review and final approval of manuscript.

JC: design of work; interpretation of data; critical review and final approval of manuscript.

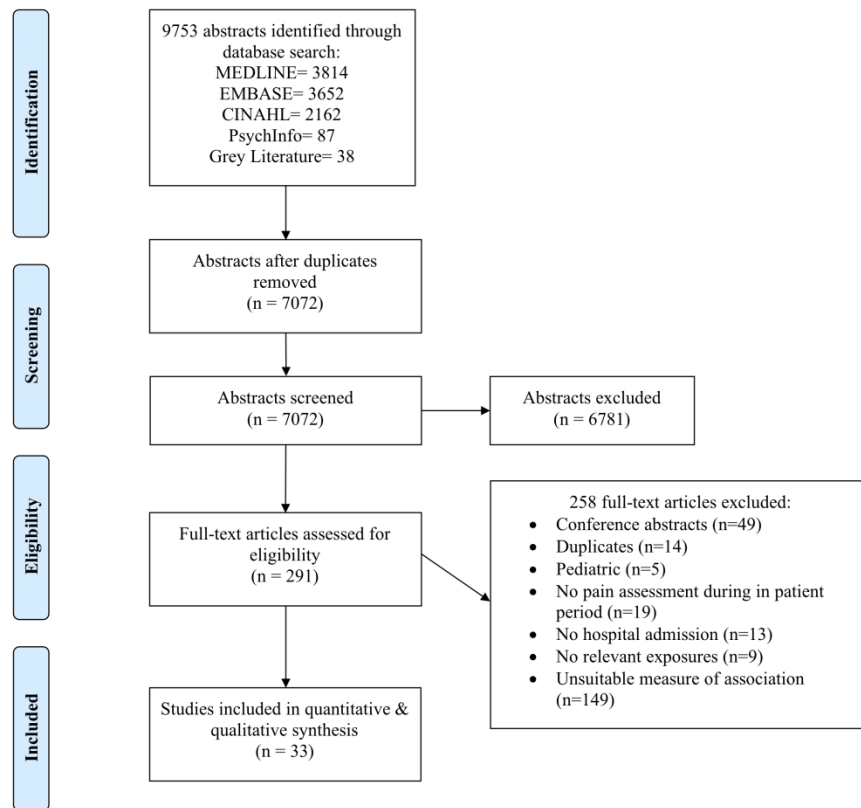

45 Figure 1. Systematic Review & Meta-Analysis Flow Diagram. All database and grey literature search was  
46 performed on October 13th, 2017.

47 215x279mm (300 x 300 DPI)

1  
2  
3  
4  
5  
6  
7  
8  
9  
10  
11  
12  
13  
14  
15  
16  
17  
18  
19  
20  
21  
22  
23  
24  
25  
26  
27  
28  
29  
30  
31  
32  
33  
34  
35  
36  
37  
38  
39  
40  
41  
42  
43  
44  
45  
46  
47  
48  
49  
50  
51  
52  
53  
54  
55  
56  
57  
58  
59  
60

|                    | 1 | 2 | 3 | 4 | 5 | 6 | 7 | 8 | 9 |
|--------------------|---|---|---|---|---|---|---|---|---|
| Alves 2013         | + | + | + | + | ? | - | + | + | + |
| Auburn 2008        | + | ? | + | + | ? | - | + | + | + |
| Baudic 2016        | + | + | + | - | ? | - | + | + | + |
| Belii 2014         | + | + | + | + | ? | - | + | + | + |
| Borges 2016        | + | + | - | + | ? | - | + | + | + |
| Camuo 2012         | + | + | + | + | + | + | + | + | + |
| Duan 2017          | + | ? | + | + | ? | + | + | + | + |
| Genov 2015         | + | + | + | + | ? | + | + | + | + |
| Gerbershagen 2014  | + | + | + | + | + | - | + | + | + |
| Gorkem 2016        | + | + | - | + | + | - | + | + | + |
| Jae Chul 2015      | + | + | + | + | - | + | + | + | + |
| Jasim 2017         | + | + | + | + | ? | + | + | - | + |
| Katz 2005          | + | + | + | + | ? | + | + | + | + |
| Kim 2016           | + | + | + | + | ? | - | + | + | + |
| Lesin 2016         | + | ? | + | + | ? | + | + | + | + |
| Liu 2012           | + | + | + | + | ? | + | + | + | + |
| Lunn 2013          | + | + | + | + | + | + | + | + | + |
| Mamie 2004         | + | + | - | + | + | + | + | + | + |
| Mei 2010           | + | + | + | + | ? | + | + | + | + |
| Murray 2016        | + | + | + | + | ? | + | + | + | + |
| Nishimura 2017     | + | + | + | + | ? | - | + | + | + |
| Orbach-Zinger 2016 | + | + | + | + | + | + | + | + | + |
| Persson 2017       | + | + | + | + | ? | + | + | + | + |
| Petrovic 2014      | + | + | - | + | ? | + | + | + | + |
| Radinovic 2014     | + | + | + | + | ? | + | + | + | + |
| Rakel 2012         | + | + | + | + | ? | - | + | + | + |
| Rehberg 2017       | + | + | + | + | + | + | + | + | + |
| Robleda 2014       | + | ? | ? | + | ? | - | + | + | + |
| Sananslip 2016     | + | + | + | + | ? | + | + | + | + |
| Sommer 2010        | + | + | + | + | + | + | + | + | + |
| Storesund 2016     | + | + | + | + | ? | + | + | + | + |
| Tighe 2014         | + | + | + | + | ? | - | + | + | + |
| Zhao 2014          | + | + | + | + | ? | - | + | + | + |

Figure 2. Assessment of study quality. 1: adequate description of population, 2: non-biased selection, 3: adequate exposure measurement, 4: adequate outcome measurement, 5: blinded outcome assessment (to exposure), 6: adequate statistical adjustment, 7: precision of results, 8: reference standard, and 9: low loss to follow up. Green: low-risk of bias, yellow: unclear-risk of bias, red: high-risk of bias.

215x279mm (300 x 300 DPI)

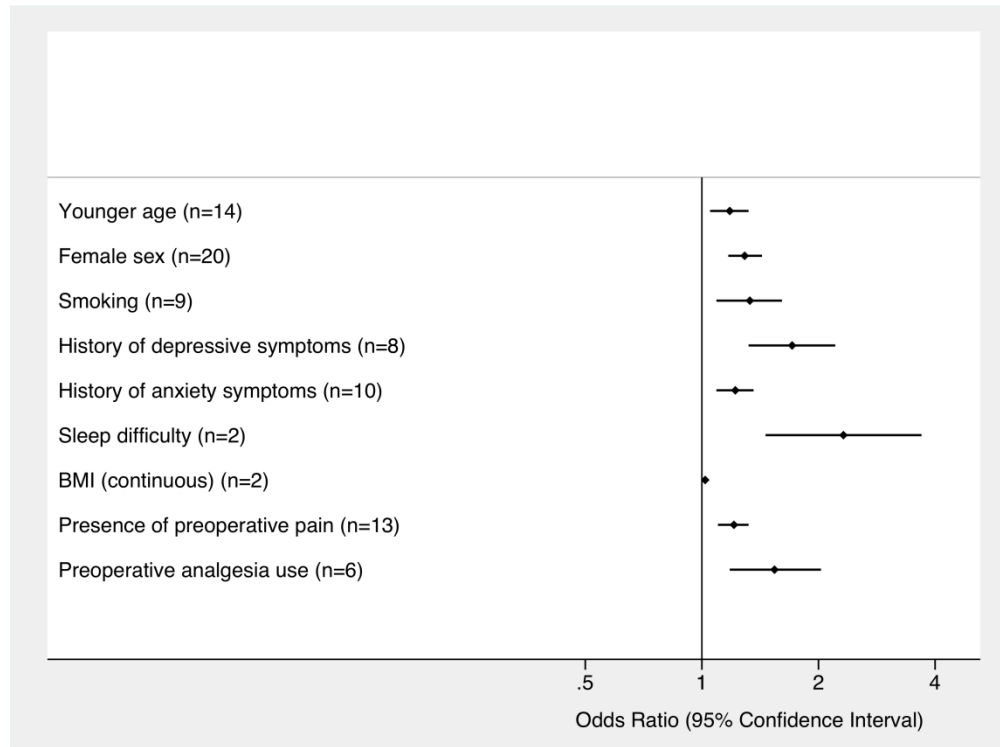

Figure 3. Summary forest plot for significant preoperative predictors of poor postoperative pain control. Odds ratios are shown with 95 percent confidence intervals. The number of studies included in the meta-analysis for each predictor is indicated.

275x205mm (300 x 300 DPI)

1  
2  
3  
4  
5  
6  
7  
8  
9  
10  
11  
12  
13  
14  
15  
16  
17  
18  
19  
20  
21  
22  
23  
24  
25  
26  
27  
28  
29  
30  
31  
32  
33  
34  
35  
36  
37  
38  
39  
40  
41  
42  
43  
44  
45  
46  
47  
48  
49  
50  
51  
52  
53  
54  
55  
56  
57  
58  
59  
60

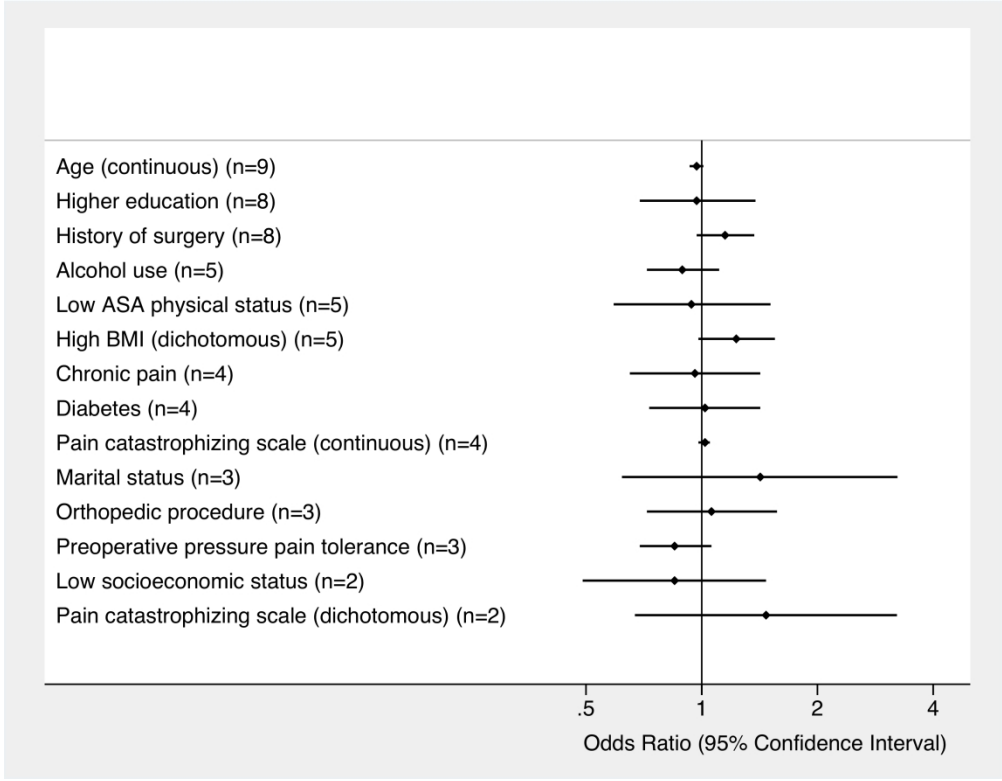

Figure 4. Summary forest plot for non-significant preoperative predictors of poor postoperative pain control. Odds ratios are shown with 95 percent confidence intervals. The number of studies included in the meta-analysis for each predictor is indicated.

277x216mm (300 x 300 DPI)

**Table S1. Quality indicators for studies of prognosis.**<sup>35</sup>

| <b>Quality Indicators</b>                 | <b>Description</b>                                                                                                                                                                |
|-------------------------------------------|-----------------------------------------------------------------------------------------------------------------------------------------------------------------------------------|
| <b>Adequate description of population</b> | Study described inclusion criteria for selecting patients, and when enrolled patients described demographics (at least age and sex).                                              |
| <b>Non-biased selection</b>               | Study either reported enrolling (or attempting to enroll) a consecutive series of patients meeting the inclusion criteria, or a random sample.                                    |
| <b>Low loss to follow-up</b>              | Postoperative pain measurements were available for at least 80% of patients for whom exposure data were collected.                                                                |
| <b>Adequate exposure measurement</b>      | Study described reproducible and appropriate methods for measuring relevant exposures.                                                                                            |
| <b>Adequate outcome measurement</b>       | Study utilized one of the following validated pain scales: VAS, VRS, and NRS.                                                                                                     |
| <b>Blinded outcome assessments</b>        | Study reported that outcomes were assessed by persons without knowledge of prognostic factors or that the pain outcome was determined by personnel not aware of study objectives. |
| <b>Adequate statistical adjustment</b>    | Study performed statistical adjustment or controlled for at least 3 potential confounders using acceptable statistical methods.                                                   |
| <b>Precision of results</b>               | Confidence intervals reported for the main outcomes of the study.                                                                                                                 |
| <b>Reference standard</b>                 | The study defined what was considered poor or good postoperative pain control.                                                                                                    |

VAS- visual analogue scale, VRS- verbal rating scale, NRS- numeric rating scale

a)

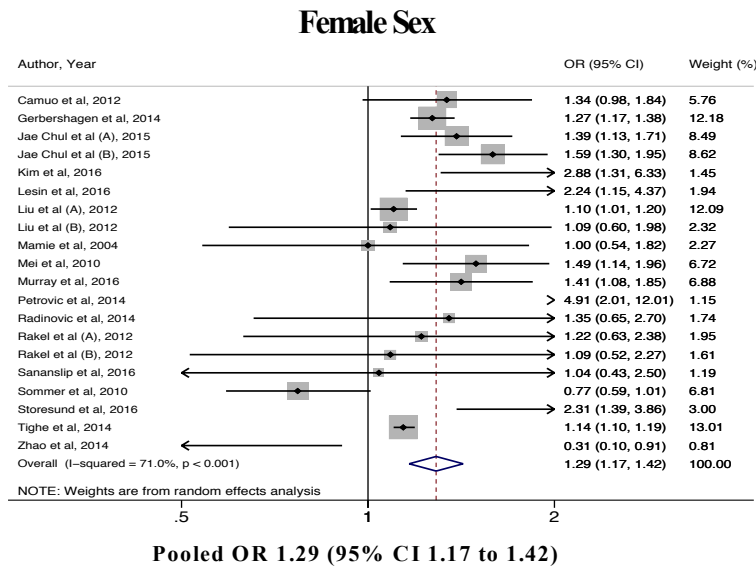

b)

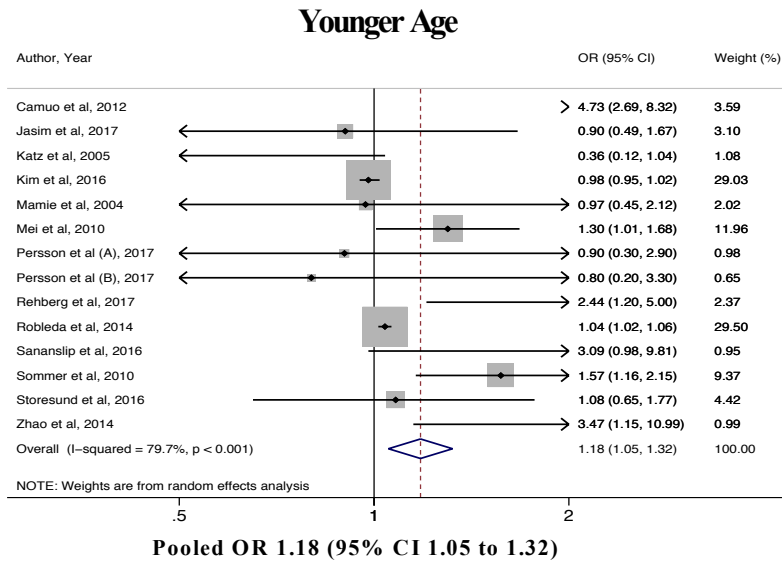

c)

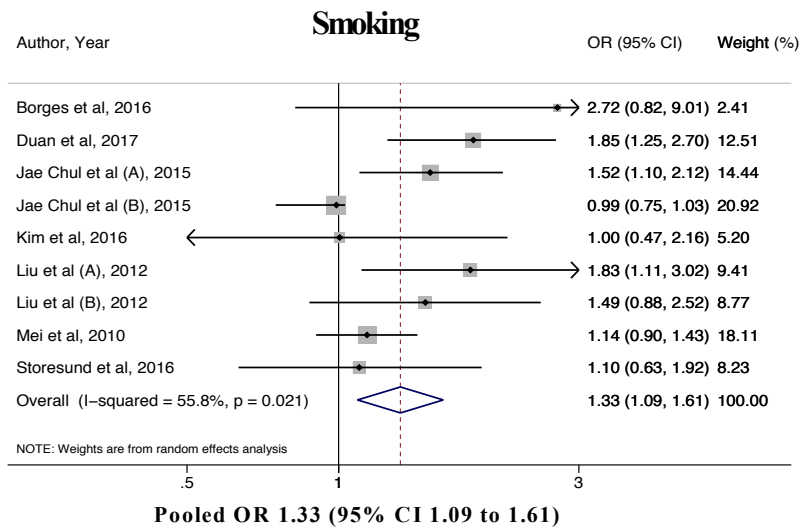

**Figure S1. Forest Plot of Preoperative Predictors of Postoperative Pain.** a) female sex b) younger age, and c) smoking history.



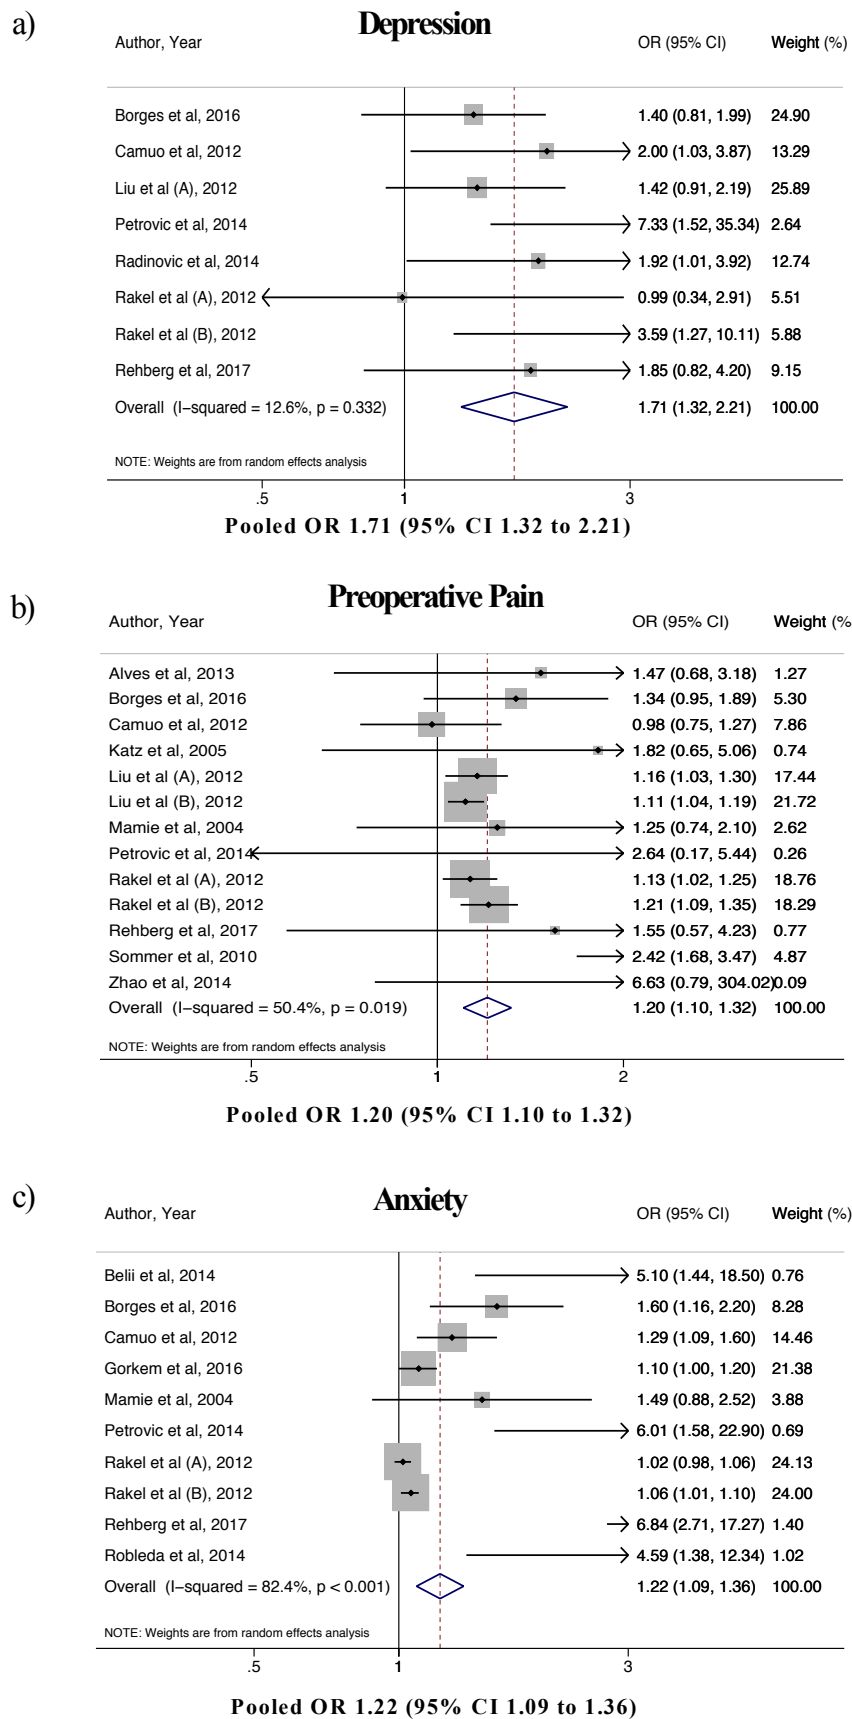

**Figure S2. Forest Plot of Significant Preoperative Predictors of Postoperative Pain.** a) history of depression symptoms, b) presence of preoperative pain, and c) history of anxiety symptoms.

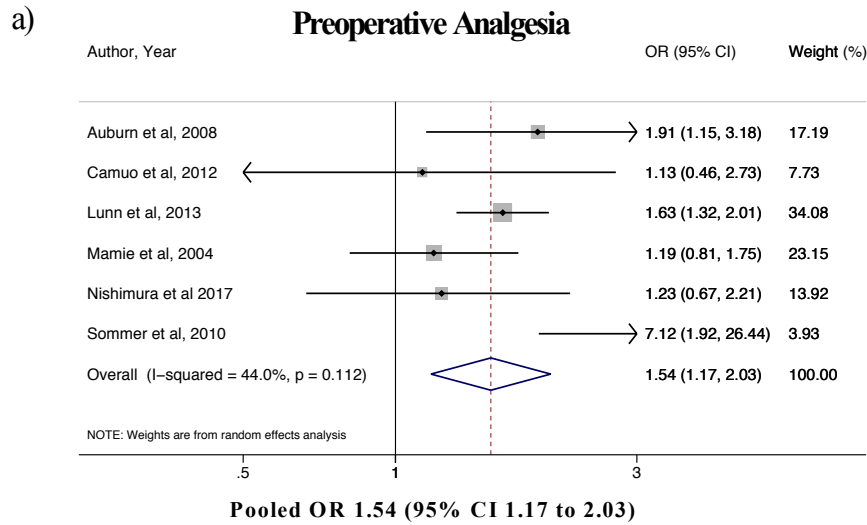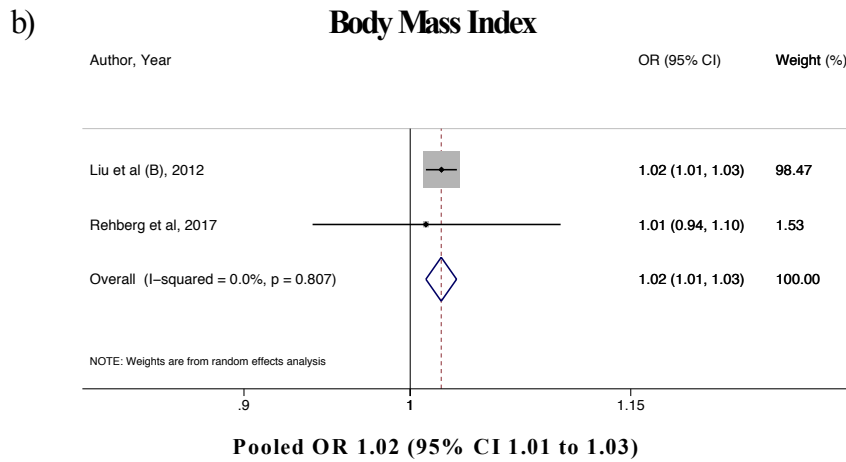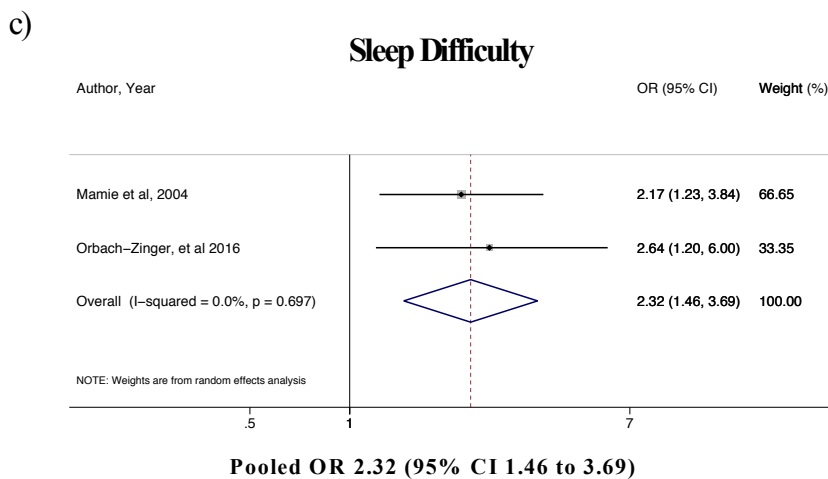

**Figure S3. Forest Plot of Significant Preoperative Predictors of Postoperative Pain.**  
 a) preoperative analgesia, b) body mass index (continuous), and c) history of sleeping difficulty.

**Appendix S1. Database Search Strategy.** Themes were combined with Boolean operator “and” and within-theme were combined with Boolean operator “or”.

| <b>MEDLINE</b>          |                                                                                                                                                                                                                                                                                                                                                                                                                                                         |
|-------------------------|---------------------------------------------------------------------------------------------------------------------------------------------------------------------------------------------------------------------------------------------------------------------------------------------------------------------------------------------------------------------------------------------------------------------------------------------------------|
| <b>Pain</b>             | <ol style="list-style-type: none"> <li>1. Pain, Postoperative/</li> <li>2. pain adj2 postoperati*.tw, kw</li> <li>3. pain adj2 post-operati*.tw, kw</li> <li>4. pain adj2 post operati*.tw, kw</li> <li>5. pain adj1 operati*.tw, kw</li> <li>6. post adj procedur* adj pain.tw, kw</li> <li>7. surg* adj1 pain.tw,kw</li> </ol>                                                                                                                        |
| <b>Pain Measurement</b> | <ol style="list-style-type: none"> <li>1. Pain Measurement/</li> <li>2. Pain adj measurement*.tw,kw</li> <li>3. Numeric adj rating adj scale.tw,kw</li> <li>4. NRS.tw,kw</li> <li>5. Visual adj analogue adj scale.tw,kw</li> <li>6. VAS.tw,kw</li> <li>7. Verbal adj rating adj scale.tw,kw</li> <li>8. VRS.tw,kw</li> </ol>                                                                                                                           |
| <b>Surgery</b>          | <ol style="list-style-type: none"> <li>1. EXP surgical procedures, operative/</li> <li>2. surger*.tw,kw</li> <li>3. operative*.tw,kw</li> <li>4. Surgical.tw,kw</li> <li>5. Operation*.tw,kw</li> </ol>                                                                                                                                                                                                                                                 |
| <b>Predictors</b>       | <ol style="list-style-type: none"> <li>1. predictor*.tw,kw</li> <li>2. Protective factors/ or risk assessment/ or risk factors/</li> <li>3. Risk adj factor*.tw,kw</li> <li>4. risk adj assessment*.tw,kw</li> <li>5. protective adj factor*.tw,kw</li> <li>6. Prevalence/</li> <li>7. Prevalence.tw,kw</li> <li>8. Incidence/</li> <li>9. Incidence.tw,kw</li> <li>10. Prognosis/</li> <li>11. Prognos*.tw,kw</li> <li>12. correlati*.tw,kw</li> </ol> |
| <b>EMBASE</b>           |                                                                                                                                                                                                                                                                                                                                                                                                                                                         |
| <b>Pain</b>             | <ol style="list-style-type: none"> <li>1. Pain, Postoperative/</li> <li>2. Pain adj2 postoperati*.tw,kw</li> <li>3. Pain adj2 post-operati*.tw,kw</li> <li>4. Pain adj2 post operati*.tw,kw</li> </ol>                                                                                                                                                                                                                                                  |

|    |                         |                                                  |
|----|-------------------------|--------------------------------------------------|
| 1  |                         |                                                  |
| 2  |                         |                                                  |
| 3  |                         |                                                  |
| 4  |                         | 5. Pain adj1 operati*.tw,kw                      |
| 5  |                         | 6. Post adj procedur* adj pain.tw,kw             |
| 6  |                         | 7. Surg* adj1 pain.tw,kw                         |
| 7  |                         |                                                  |
| 8  | <b>Pain Measurement</b> | 1. Pain adj measurement*.tw,kw                   |
| 9  |                         | 2. Numeric adj rating adj scale.tw,kw            |
| 10 |                         | 3. NRS.tw,kw                                     |
| 11 |                         | 4. Visual adj analogue adj scale.tw,kw           |
| 12 |                         | 5. VAS.tw,kw                                     |
| 13 |                         | 6. Verbal adj rating adj scale.tw,kw             |
| 14 |                         | 7. VRS.tw,kw                                     |
| 15 |                         | 8. Exp pain assessment/ or exp pain measurement/ |
| 16 |                         |                                                  |
| 17 |                         |                                                  |
| 18 | <b>Surgery</b>          | 1. Exp surgery/                                  |
| 19 |                         | 2. Surger*.tw,kw                                 |
| 20 |                         | 3. Operative*.tw,kw                              |
| 21 |                         | 4. Operation*.tw,kw                              |
| 22 |                         |                                                  |
| 23 |                         |                                                  |
| 24 | <b>Predictors</b>       | 1. Predictor*.tw,kw                              |
| 25 |                         | 2. Risk adj factor*.tw,kw                        |
| 26 |                         | 3. Prevalence/                                   |
| 27 |                         | 4. Prevalence.tw,kw                              |
| 28 |                         | 5. Incidence/                                    |
| 29 |                         | 6. Incidence.tw,kw                               |
| 30 |                         | 7. Prognosis/                                    |
| 31 |                         | 8. Prognos*.tw,kw                                |
| 32 |                         | 9. Correlati*.tw,kw                              |
| 33 |                         | 10. "Prediction and forecasting"/                |
| 34 |                         | 11. risk assessment/                             |
| 35 |                         | 12. risk factor/                                 |
| 36 |                         | 13. protective adj factor*.tw,kw                 |
| 37 |                         | 14. risk adj assessment.tw,kw                    |
| 38 |                         |                                                  |
| 39 |                         |                                                  |
| 40 |                         |                                                  |
| 41 |                         |                                                  |
| 42 | <b>PsychInfo</b>        |                                                  |
| 43 | <b>Pain</b>             | 1. Pain adj2 postoperati*.tw                     |
| 44 |                         | 2. Pain adj2 post-operati*.tw                    |
| 45 |                         | 3. Pain adj2 post operati*.tw                    |
| 46 |                         | 4. Pain adj1 operati*.tw                         |
| 47 |                         | 5. Post adj procedur* adj pain.tw                |
| 48 |                         | 6. Surg* adj1 pain.tw                            |
| 49 |                         | 7. Exp Pain                                      |
| 50 |                         |                                                  |
| 51 |                         |                                                  |
| 52 | <b>Pain Measurement</b> | 1. Pain Measurement/                             |
| 53 |                         | 2. Pain adj measurement*.tw                      |
| 54 |                         | 3. Numeric adj rating adj scale.tw               |
| 55 |                         |                                                  |
| 56 |                         |                                                  |
| 57 |                         |                                                  |
| 58 |                         |                                                  |
| 59 |                         |                                                  |
| 60 |                         |                                                  |

|    |                         |                                                    |
|----|-------------------------|----------------------------------------------------|
| 1  |                         |                                                    |
| 2  |                         |                                                    |
| 3  |                         |                                                    |
| 4  |                         | 4. NRS.tw                                          |
| 5  |                         | 5. Visual adj analogue adj scale.tw                |
| 6  |                         | 6. VAS.tw                                          |
| 7  |                         | 7. Verbal adj rating adj scale.tw                  |
| 8  |                         | 8. VRS.tw                                          |
| 9  |                         |                                                    |
| 10 |                         |                                                    |
| 11 | <b>Surgery</b>          | 1. surger*.tw                                      |
| 12 |                         | 2. operative*.tw                                   |
| 13 |                         | 3. Surgical.tw                                     |
| 14 |                         | 4. Operation*.tw                                   |
| 15 |                         | 5. Exp surgery/                                    |
| 16 |                         |                                                    |
| 17 |                         |                                                    |
| 18 |                         |                                                    |
| 19 | <b>Predictors</b>       | 1. predictor*.tw                                   |
| 20 |                         | 2. Protective factors/ or risk assessment/ or risk |
| 21 |                         | factors/                                           |
| 22 |                         | 3. Risk adj factor*.tw                             |
| 23 |                         | 4. risk adj assessment*.tw                         |
| 24 |                         | 5. protective adj factor*.tw                       |
| 25 |                         | 6. Prevalence.tw                                   |
| 26 |                         | 7. Incidence.tw                                    |
| 27 |                         | 8. Prognosis/                                      |
| 28 |                         | 9. Prognos*.tw                                     |
| 29 |                         | 10. correlati*.tw                                  |
| 30 |                         |                                                    |
| 31 |                         |                                                    |
| 32 |                         |                                                    |
| 33 |                         |                                                    |
| 34 | <b>CINAHL</b>           |                                                    |
| 35 | <b>Pain</b>             | 1. MH “postoperative pain”                         |
| 36 |                         | 2. Postoperative pain                              |
| 37 |                         | 3. Pain AND (surgery or surgical or operative or   |
| 38 |                         | operative)”                                        |
| 39 |                         |                                                    |
| 40 | <b>Pain Measurement</b> | 1. MH “pain measurement”                           |
| 41 |                         | 2. Pain measurement                                |
| 42 |                         | 3. Pain assessment or pain scale or pain tool      |
| 43 |                         | 4. Nrs or numeric rating scale                     |
| 44 |                         | 5. Vas or visual analogue scale OR visual analog   |
| 45 |                         | scale                                              |
| 46 |                         | 6. Vrs or verbral rating scale                     |
| 47 |                         |                                                    |
| 48 |                         |                                                    |
| 49 |                         |                                                    |
| 50 |                         |                                                    |
| 51 | <b>Surgery</b>          | 1. MH “surgery, operative”                         |
| 52 |                         | 2. Surgery or operation or surgical procedure      |
| 53 |                         |                                                    |
| 54 |                         |                                                    |
| 55 |                         |                                                    |
| 56 | <b>Predictors</b>       | 1. MH “independent variable”                       |
| 57 |                         |                                                    |
| 58 |                         |                                                    |
| 59 |                         |                                                    |
| 60 |                         |                                                    |

2. Predictors
3. MH “risk factors”
4. MH “risk assessment”
5. Risk factors
6. MH “prevalence”
7. Prevalence
8. Incidence
9. MH “incidence”
10. MH “prognosis”
11. Prognosis

For peer review only

## MOOSE Checklist for Meta-analyses of Observational Studies

| Item No                                     | Recommendation                                                                                                                                                                                                                                                               | Reported on Page No               |
|---------------------------------------------|------------------------------------------------------------------------------------------------------------------------------------------------------------------------------------------------------------------------------------------------------------------------------|-----------------------------------|
| Reporting of background should include      |                                                                                                                                                                                                                                                                              |                                   |
| 1                                           | Problem definition                                                                                                                                                                                                                                                           | 4                                 |
| 2                                           | Hypothesis statement                                                                                                                                                                                                                                                         | 4                                 |
| 3                                           | Description of study outcome(s)                                                                                                                                                                                                                                              | 6                                 |
| 4                                           | Type of exposure or intervention used                                                                                                                                                                                                                                        | 6, Table 2                        |
| 5                                           | Type of study designs used                                                                                                                                                                                                                                                   | 6                                 |
| 6                                           | Study population                                                                                                                                                                                                                                                             | 6, 7                              |
| Reporting of search strategy should include |                                                                                                                                                                                                                                                                              |                                   |
| 7                                           | Qualifications of searchers (eg, librarians and investigators)                                                                                                                                                                                                               | 5                                 |
| 8                                           | Search strategy, including time period included in the synthesis and key words                                                                                                                                                                                               | 5, 6 and Appendix S1              |
| 9                                           | Effort to include all available studies, including contact with authors                                                                                                                                                                                                      | 5-7                               |
| 10                                          | Databases and registries searched                                                                                                                                                                                                                                            | 5                                 |
| 11                                          | Search software used, name and version, including special features used (eg, explosion)                                                                                                                                                                                      | 5 and Appendix S1                 |
| 12                                          | Use of hand searching (eg, reference lists of obtained articles)                                                                                                                                                                                                             | 5, 6                              |
| 13                                          | List of citations located and those excluded, including justification                                                                                                                                                                                                        | Figure 1                          |
| 14                                          | Method of addressing articles published in languages other than English                                                                                                                                                                                                      | 7                                 |
| 15                                          | Method of handling abstracts and unpublished studies                                                                                                                                                                                                                         | 6                                 |
| 16                                          | Description of any contact with authors                                                                                                                                                                                                                                      | 7                                 |
| Reporting of methods should include         |                                                                                                                                                                                                                                                                              |                                   |
| 17                                          | Description of relevance or appropriateness of studies assembled for assessing the hypothesis to be tested                                                                                                                                                                   | 6                                 |
| 18                                          | Rationale for the selection and coding of data (eg, sound clinical principles or convenience)                                                                                                                                                                                | 6-9                               |
| 19                                          | Documentation of how data were classified and coded (eg, multiple raters, blinding and interrater reliability)                                                                                                                                                               | 6-9                               |
| 20                                          | Assessment of confounding (eg, comparability of cases and controls in studies where appropriate)                                                                                                                                                                             | 8, Figure 2                       |
| 21                                          | Assessment of study quality, including blinding of quality assessors, stratification or regression on possible predictors of study results                                                                                                                                   | 7, Table S1, Figure 2             |
| 22                                          | Assessment of heterogeneity                                                                                                                                                                                                                                                  | 8, 9                              |
| 23                                          | Description of statistical methods (eg, complete description of fixed or random effects models, justification of whether the chosen models account for predictors of study results, dose-response models, or cumulative meta-analysis) in sufficient detail to be replicated | 8, 9                              |
| 24                                          | Provision of appropriate tables and graphics                                                                                                                                                                                                                                 | Tables 1, 2. Figures 1, 2,3       |
| Reporting of results should include         |                                                                                                                                                                                                                                                                              |                                   |
| 25                                          | Graphic summarizing individual study estimates and overall estimate                                                                                                                                                                                                          | Figure 3, 4, Figure S1, S2 and S3 |

|    |                                                              |         |
|----|--------------------------------------------------------------|---------|
| 26 | Table giving descriptive information for each study included | Table 1 |
| 27 | Results of sensitivity testing (eg, subgroup analysis)       | 12      |
| 28 | Indication of statistical uncertainty of findings            | Table 2 |

| Item No                                 | Recommendation                                                                                                            | Reported on Page No |
|-----------------------------------------|---------------------------------------------------------------------------------------------------------------------------|---------------------|
| Reporting of discussion should include  |                                                                                                                           |                     |
| 29                                      | Quantitative assessment of bias (eg, publication bias)                                                                    | 8, 9                |
| 30                                      | Justification for exclusion (eg, exclusion of non-English language citations)                                             | Figure 1            |
| 31                                      | Assessment of quality of included studies                                                                                 | Figure 2            |
| Reporting of conclusions should include |                                                                                                                           |                     |
| 32                                      | Consideration of alternative explanations for observed results                                                            | 12-16               |
| 33                                      | Generalization of the conclusions (ie, appropriate for the data presented and within the domain of the literature review) | 15-16               |
| 34                                      | Guidelines for future research                                                                                            | 16-17               |
| 35                                      | Disclosure of funding source                                                                                              | 1                   |

From: Stroup DF, Berlin JA, Morton SC, et al, for the Meta-analysis Of Observational Studies in Epidemiology (MOOSE) Group. Meta-analysis of Observational Studies in Epidemiology. A Proposal for Reporting. *JAMA*. 2000;283(15):2008-2012. doi: 10.1001/jama.283.15.2008.

Transcribed from the original paper within the NEUROSURGERY® Editorial Office, Atlanta, GA, United States. August 2012.



# BMJ Open

## Preoperative predictors of poor acute postoperative pain control: a systematic review and meta-analysis

|                                 |                                                                                                                                                                                                                                                                                                                                                                                                                                                                                          |
|---------------------------------|------------------------------------------------------------------------------------------------------------------------------------------------------------------------------------------------------------------------------------------------------------------------------------------------------------------------------------------------------------------------------------------------------------------------------------------------------------------------------------------|
| Journal:                        | <i>BMJ Open</i>                                                                                                                                                                                                                                                                                                                                                                                                                                                                          |
| Manuscript ID                   | bmjopen-2018-025091.R1                                                                                                                                                                                                                                                                                                                                                                                                                                                                   |
| Article Type:                   | Research                                                                                                                                                                                                                                                                                                                                                                                                                                                                                 |
| Date Submitted by the Author:   | 20-Dec-2018                                                                                                                                                                                                                                                                                                                                                                                                                                                                              |
| Complete List of Authors:       | Yang, Michael M.H.; University of Calgary, Clinical Neurosciences<br>Hartley, Rebecca; University of Calgary, Surgery<br>Leung, Alexander; University of Calgary, Department of Community Health Sciences<br>Ronksley, Paul; University of Calgary, Community Health Sciences<br>Jette, Nathalie; Icahn School of Medicine at Mount Sinai, Neurology<br>Casha, Steven; University of Calgary, Clinical Neurosciences<br>Riva-Cambrin, Jay; University of Calgary, Clinical Neurosciences |
| <b>Primary Subject Heading</b>: | Surgery                                                                                                                                                                                                                                                                                                                                                                                                                                                                                  |
| Secondary Subject Heading:      | Epidemiology                                                                                                                                                                                                                                                                                                                                                                                                                                                                             |
| Keywords:                       | postoperative pain, preoperative predictors, SURGERY, pain, pain scale, meta-analysis                                                                                                                                                                                                                                                                                                                                                                                                    |
|                                 |                                                                                                                                                                                                                                                                                                                                                                                                                                                                                          |

SCHOLARONE™  
Manuscripts

## Preoperative predictors of poor acute postoperative pain control: a systematic review and meta-analysis

Michael M.H. Yang MD M.Biotech<sup>1,2</sup>, Rebecca L. Hartley MD<sup>2,3</sup>, Alexander A. Leung MD MPH<sup>2,4</sup>, Paul E. Ronksley PhD<sup>2</sup>, Nathalie Jetté MD MSc<sup>5</sup>, Steven Casha MD PhD<sup>1</sup>, Jay Riva-Cambrin MD MSc<sup>1,2</sup>

### Affiliations:

<sup>1</sup>Department of Clinical Neurosciences, Section of Neurosurgery, University of Calgary, Canada

<sup>2</sup>Department of Community Health Sciences, University of Calgary, Canada

<sup>3</sup>Section of Plastic Surgery, Department of Surgery, University of Calgary, Canada

<sup>4</sup>Division of Endocrinology and Metabolism, Department of Medicine, University of Calgary, Canada

<sup>5</sup>Icahn School of Medicine at Mount Sinai, Department of Neurology, USA

### Author of Correspondence:

Dr. Michael M.H. Yang

Department of Clinical Neurosciences

University of Calgary

12<sup>th</sup> Floor, 29 Street NW

Calgary, AB, T2N 2T9, Canada

Email: [minhan.yang@ucalgary.ca](mailto:minhan.yang@ucalgary.ca)

Telephone: 1-403-667-3678

Fax: 1-403-283-5559

**PROSPERO ID:** CRD42017080682

**Funding Statement:** This research received no specific grant from any funding agency in the public, commercial or not-for-profit sectors

**Conflict of Interest:** The authors declare no competing interests.

**Abbreviated Title (running head):** Predictors of poor acute postoperative pain control in adults

**Data Sharing Statement:** Extracted data and statistical code will be made available by contacting the corresponding author.

**Patient Consent:** Patient consent is not required when conducting a systematic review.

**Ethics Approval:** This study did not require ethical approval as the data used have been published previously, and hence are already in the public domain.

**Keywords:** postoperative pain, preoperative predictors, surgery, pain, pain scales, meta-analysis

**Word Count:** 3,334

## Abstract

### Objectives

Inadequate postoperative pain control is common and is associated with poor clinical outcomes. This study aimed to identify preoperative predictors of poor postoperative pain control in adults undergoing inpatient surgery.

### Design

Systematic review and meta-analysis.

### Data Sources

MEDLINE, EMBASE, CINAHL, and PsychInfo were searched through October 13<sup>th</sup>, 2017.

### Eligibility Criteria

Studies in any language were included if they evaluated postoperative pain using a validated instrument (e.g., visual-analogue-scale for pain) in adults ( $\geq 18$  years) and reported a measure of association between poor postoperative pain control (as defined by individual study authors) and at least one preoperative predictor during the hospital stay.

### Data extraction and synthesis

Two independent reviewers screened articles, extracted data, and assessed study quality. Measures of association for each preoperative predictor were pooled using random effects models.

### Results

Thirty-three studies representing 53,362 patients were included in this review. Significant preoperative predictors of poor postoperative pain control included younger age (OR 1.18 [95%CI 1.05-1.32]), female sex (OR 1.29 [95%CI 1.17-1.43]), smoking (OR 1.33 [95%CI 1.09-1.61]), history of depressive symptoms (OR 1.71 [95%CI 1.32-2.22]), history of anxiety symptoms (OR 1.22 [95%CI 1.09-1.36]), sleep difficulties (OR 2.32 [95%CI 1.46-3.69]), higher BMI (OR 1.02 [95%CI 1.01-1.03]), presence of preoperative pain (OR 1.21 [95%CI 1.10-1.32]), and use of preoperative analgesia (OR 1.54 [95%CI 1.18-2.03]). Pain catastrophizing, ASA status, chronic pain, marital status, socioeconomic status, education, previous surgical history, preoperative pressure pain tolerance, and orthopedic surgery (vs. abdominal surgery) were not associated with an increased odds of poor postoperative pain control. Study quality was generally high, although appropriate blinding of predictor during outcome ascertainment was often limited.

### Conclusions

Nine predictors of poor postoperative pain control were identified. These should be recognized as potentially important factors when developing discipline specific clinical-care pathways to improve pain outcomes and to guide future surgical pain research.

1  
2  
3 Article Summary  
4  
5

6 *Strengths and limitations of this study*  
7

- 8
- 9 • This systematic review provides a comprehensive meta-analysis on a large number of preoperative patient prognostic factors for poor acute postoperative pain control.
  - 10 • The inclusion of multiple surgical specialties and articles representing diverse geographical locations increases the generalizability of the findings.
  - 11 • There were a variety of definitions for poor postoperative pain control, timing of pain assessment, and thresholds used to categorize continuous preoperative variables making the clinical and statistical interpretation of the meta-analysis more challenging.
  - 12 • For certain preoperative variables, the number of studies included were few and may be underpowered to detect significant differences.
- 13  
14  
15  
16  
17  
18  
19  
20  
21  
22  
23  
24  
25  
26  
27  
28  
29  
30  
31  
32  
33  
34  
35  
36  
37  
38  
39  
40  
41  
42  
43  
44  
45  
46  
47  
48  
49  
50  
51  
52  
53  
54  
55  
56  
57  
58  
59  
60

## Introduction

Since 1999, when the Joint Commission on Accreditation of Healthcare Organizations set the standard for the appropriate assessment and management of pain, pain has been recognized as the fifth vital sign.<sup>1</sup> With the aging and growing population, the number of surgeries has increased to an excess of 280 million procedures performed globally every year.<sup>2-8</sup> Numerous studies suggest poor acute postoperative pain control is common and often inadequately treated.<sup>9-12</sup> Importantly, ineffective postoperative pain control is associated with poor outcomes including increased length-of-stay, sleep disturbance, prolonged time to first mobilization, and increased opioid use.<sup>11 13 14</sup> Further, poor postoperative pain control is associated with delirium in the elderly, development of chronic pain syndromes, cardiopulmonary, and thromboembolic complications.<sup>10 11 15-17</sup> Postoperative pain may be improved by understanding the preoperative predictors of poor pain control by allowing use of anticipatory and individualized treatments.<sup>18 19</sup>

A previous systematic review reported a limited number of predictors of poor postoperative pain control including age, anxiety, preoperative pain, and surgery type.<sup>20</sup> However, quantitative analysis was not possible due to variability in the reporting of measures of associations and study design heterogeneity of the included studies. Since its publication nearly a decade ago, many additional studies have been published with improved methodological rigour,<sup>21-24</sup> thus providing a new opportunity to provide an updated summary of the literature and to generate pooled estimates of risk. The goal of this study was to systematically identify significant preoperative predictors of poorly controlled acute postoperative pain and to quantify the associated risks. We focused on acute postoperative pain experienced during the surgical hospitalization. This meta-analysis is important to help identify predictors that could inform future surgical pain research

1  
2  
3 and aid in the development of discipline-specific clinical care pathways (e.g., enhanced recovery  
4 after surgery programs) to improve pain outcomes.  
5  
6  
7  
8  
9

## 10 **Methods**

11  
12 This review was reported according to the Meta-analyses Of Observational Studies in  
13 Epidemiology (MOOSE) standards for systematic reviews and meta-analyses of observational  
14 studies. This review was also conducted based on an *a priori* protocol registered with  
15 PROSPERO International Prospective Register of Systematic Review (ID: CRD42017080682,  
16 [http://www.crd.york.ac.uk/PROSPERO/display\\_record.php?ID=CRD42017080682](http://www.crd.york.ac.uk/PROSPERO/display_record.php?ID=CRD42017080682)).<sup>25-27</sup>  
17  
18  
19  
20  
21  
22  
23  
24  
25

### 26 *Patient and Public Involvement*

27  
28 Patients and the public were not involved in the development of this systematic review.  
29  
30  
31  
32

### 33 *Search Strategy*

34  
35 A search strategy was developed using the *Peer Review of Electronic Search Strategy* (PRESS)<sup>28</sup>  
36 in consultation with two research librarians. We focused on the keywords “pain”, “pain  
37 measurement”, “surgery”, and “predictors”. We searched MEDLINE (1950-October 13<sup>th</sup>, 2017),  
38 EMBASE (1980-October 13<sup>th</sup>, 2017), CINAHL (1937-October 13<sup>th</sup>, 2017) and PsychInfo (1967-  
39 October 13<sup>th</sup>, 2017) (Appendix S1, online supplemental information). To maximize sensitivity  
40 for studies of prognosis, search filters were not used, and no restrictions were placed on date or  
41 language of publication.<sup>29 30</sup> Our search was repeated using Google and Google Scholar for the  
42 grey literature. Bibliographies of included studies were searched by hand for other relevant  
43  
44  
45  
46  
47  
48  
49  
50  
51  
52  
53  
54  
55  
56  
57  
58  
59  
60

1  
2  
3 articles. A local pain specialist was also consulted to identify any potential ongoing studies or  
4  
5 unpublished data.  
6  
7  
8  
9

### 10 *Study Inclusion*

11  
12 We included observational studies (cohort and cross-sectional) reporting on adults ( $\geq 18$  years  
13  
14 old) undergoing surgery and admitted for at least 24 hours following their procedure (e.g.,  
15  
16 excluded ambulatory surgery/procedures, dental procedures, carpal tunnel release, etc.), and  
17  
18 studies that assessed for the association between preoperative patient-level predictors and poor  
19  
20 postoperative pain control (as defined by individual study authors). Only inpatient procedures  
21  
22 were included to minimize the heterogeneity of the surgical population as well as providing more  
23  
24 reliable pain outcomes. Perioperative predictors were not assessed because our primary aim was  
25  
26 to inform clinicians evaluating patients in the preoperative clinical setting where perioperative  
27  
28 risk factors may not be known or modifiable. No interventional studies were included.  
29  
30  
31  
32  
33  
34

35  
36 Studies were required to report an assessment of pain during the inpatient period using a  
37  
38 validated pain scale. Previous studies have demonstrated that the visual analogue scale (VAS),  
39  
40 numeric rating scale (NRS), and verbal rating scales (VRS) for pain are highly correlated with  
41  
42 each other, and thus they were considered comparable in the present study.<sup>31</sup> To facilitate  
43  
44 pooling of data, we only included studies that reported a measure of association, such as an odds  
45  
46 ratio (OR) or relative risk (RR), as well as studies with raw data where an OR could be manually  
47  
48 calculated. Conference abstracts, reviews, protocols, and secondary publications (of studies  
49  
50 already included in our review) were excluded. Two reviewers (M.Y. and R.H.) independently  
51  
52 reviewed titles, abstracts, and full-text articles of the retrieved studies in duplicate. Discrepancies  
53  
54  
55  
56  
57  
58  
59  
60

1  
2  
3 were resolved by consensus. Inter-rater agreement was evaluated using Cohen's  $\kappa$  statistic for the  
4  
5 full-text review stage.  
6  
7  
8  
9

### 10 *Data Extraction*

11  
12 Study information such as author, year and country of publication, sample size, pain scale used,  
13  
14 the definition of poorly controlled postoperative pain, number of predictors adjusted for in a  
15  
16 multivariable regression model (where applicable), and the average age of the sample population  
17  
18 were extracted. Both unadjusted and most adjusted effect estimates were recorded whenever  
19  
20 multiple estimates were presented. For studies that reported their results in distinct strata (e.g.,  
21  
22 young vs. old age, or moderate vs. severe pain), each stratum was treated as an independent  
23  
24 study for the pooled analysis (no patients were analyzed in duplicate).<sup>23 32-34</sup> Non-English studies  
25  
26 were data-extracted with the help of a translator.  
27  
28  
29  
30  
31  
32

### 33 *Study Quality Assessment*

34  
35 We used a component-based approach to assess the quality of included studies.<sup>35</sup> The following  
36  
37 variables were considered to be the most important quality indicators for studies of prognosis  
38  
39 (definition of quality indicators are in Table S1, online supplemental information)<sup>35</sup>: description  
40  
41 of population, non-biased selection, adequate follow-up (e.g., postoperative pain measurements  
42  
43 were recorded for at least 80% of study participants), predictor measurement, outcome  
44  
45 measurement and ascertainment, adjustment for confounding variables (operationalized as  
46  
47 adjusting for at least 3 potential confounders), precision of reported results (e.g., reporting of  
48  
49 confidence intervals), as well as the use of an appropriate reference standard (e.g., definition of  
50  
51 poor postoperative pain control provided).<sup>29 35 36</sup> Data-extraction and assessment of study quality  
52  
53  
54  
55  
56  
57  
58  
59  
60



1  
2  
3 were performed in duplicate; discrepancies were resolved by consensus. If a study presented  
4 unclear data, the corresponding author was emailed with a follow-up email after two weeks if a  
5 response was not received.  
6  
7  
8  
9

### 10 11 12 *Statistical Analysis*

13  
14 We used ORs as the common measure of association. RRs were converted to odds ratio using the  
15 formula,  $OR = RR / (1 / [1 / (1 - P_o)] + P_o)$ , where  $P_o$  is the incidence of the outcome of interest in the  
16 non-exposed group.<sup>37</sup> When raw data were presented, ORs were manually calculated. For the  
17 primary analysis, the most adjusted ORs were used to determine the pooled estimates. The  
18 analysis was then repeated using the least adjusted effect estimates. Pooled estimates, expressed  
19 as ORs (with 95% confidence intervals [CI]), were determined for each preoperative predictor  
20 associated with poor postoperative pain control levels using the DerSimonian and Laird random  
21 effects model and visualized using forest plots. A random effects model was chosen due to the  
22 variability in surgical specialties, definitions of poor postoperative pain, and the reported timing  
23 of postoperative pain assessment in the included studies. Meta-analysis was performed using the  
24 'metan' command within STATA v.15 (StataCorp, College Station, Texas). Level of  
25 significance was set at  $\alpha=0.05$ .  
26  
27  
28  
29  
30  
31  
32  
33  
34  
35  
36  
37  
38  
39  
40  
41  
42  
43

44  
45 Between-study heterogeneity was examined and quantified using the Cochran Q test and  $I^2$   
46 statistic.<sup>38</sup> Stratified analysis and meta-regression were performed to explore for potential  
47 sources of heterogeneity based on an *a priori* list of factors related to study quality and clinical  
48 prognosis. Stratification was conducted on the following variables: degree of statistical  
49 adjustment (e.g., operationalized as adjustment for  $<3$  vs.  $\geq 3$  variables), definition of poor  
50  
51  
52  
53  
54  
55  
56  
57  
58  
59  
60

1  
2  
3 postoperative pain control (moderate vs. severe pain; moderate pain: 3-6, severe pain: >6 on an  
4  
5 11-point scale; studies not using a numeric scale (e.g., morphine requirements as the definition  
6  
7 for poor pain control) were considered moderate pain), surgical discipline, blinding of predictors  
8  
9 when assessing pain scores, and location of pain assessment (e.g., post-anesthetic care unit vs.  
10  
11 ward). Preoperative factors only reported in a single study could not be pooled and therefore  
12  
13 were not included in the final analyses. We did not assess for publication bias because  
14  
15 conventional tools used to examine for publication bias, such as funnel plots, are intended to  
16  
17 detect small study effects. Small study effects are challenging to interpret for meta-analyses of  
18  
19 observational studies, such as ours, where multiple sources of heterogeneity may be present, such  
20  
21 as those arising from true clinical differences (e.g., different surgical disciplines/procedures) or  
22  
23 bias inherent to individual studies (e.g., residual confounding, lack of blinding).<sup>30</sup>  
24  
25  
26  
27  
28  
29  
30

## 31 **Results**

### 32 33 34 *Literature Search & Study Characteristics*

35  
36 We identified 9,753 articles through electronic database and grey literature search (Figure 1).  
37  
38 Consultation with a pain expert and searching of the grey literature yielded 38 articles. After  
39  
40 initial screening, 291 articles were included for full-text review. Full-text review resulted in the  
41  
42 inclusion of 33 articles for data extraction with excellent inter-rater reliability ( $\kappa= 0.83$  [95%CI  
43  
44 0.71-0.91]). No unpublished studies were identified and included in the final analysis.  
45  
46  
47  
48  
49

50  
51 The 33 included studies represented 53,362 patients with publication dates ranging between 2002  
52  
53 and 2017 (study characteristics of included studies are in Table 1).<sup>19 21-24 32-34 39-63</sup> Twenty-six  
54  
55 studies were prospective cohort studies (79%) and 7 were retrospective cohort studies (21%).  
56  
57  
58  
59  
60

1  
2  
3 Most studies were conducted in Europe (17/33 studies, 51.5%), followed by Asia (8/33 studies,  
4 24.2%). Studies involving a mixture of specialties (11/33 studies, 33.3%) and general surgery  
5 (10/33 studies, 30.3%) had the largest representation. A variety of thresholds were used to define  
6 poor pain control on a standard 11-point scale (0-10) across studies; the most common definition  
7 of significant postoperative pain was  $\geq 4$  out of 10 (13/33 studies, 39.4%) followed by  $>$  or  $\geq 5$   
8 out of 10 (7/33 studies, 21.1%). NRS, VAS and VRS scale for pain was used in 57.6%, 42.4%,  
9 and 3.0% of studies respectively. The most common time-interval when postoperative pain was  
10 measured was between 24-48 hours (19/33 studies, 57.6%). The mean number of predictors  
11 (including preoperative and perioperative variables) explored per study was 10.0 (SD: 5.73,  
12 range 1-19) (Table 1). There was a lack of dedicated prognostic studies evaluating predictors of  
13 postoperative pain control in most surgical sub-specialities including neurosurgery, spine  
14 surgery, otolaryngology and plastic surgery.  
15  
16  
17  
18  
19  
20  
21  
22  
23  
24  
25  
26  
27  
28  
29  
30  
31  
32

### 33 *Assessment of Study Quality*

34  
35 The overall methodological quality of the included studies was generally high except for the use  
36 of a blinded outcome assessment (Figure 2). In 25 studies (76%), there was either no blinding or  
37 no reporting on whether there was blinding of predictors during outcome ascertainment. The lack  
38 of blinding of predictors during outcome ascertainment in the majority of studies could lead to  
39 increased risk of misclassification bias. Twelve studies (36%) did not adjust for at least 3  
40 potential confounders, 5 studies (15%) did not provide definitions of preoperative predictors, and  
41 4 studies (12%) did not define how their sample was selected.  
42  
43  
44  
45  
46  
47  
48  
49  
50  
51  
52  
53

### 54 *Preoperative Predictors of Poor Postoperative Pain Control*

1  
2  
3 Of the 23 variables examined, 9 statistically significant preoperative predictors of poor  
4 postoperative pain control were found: younger age (OR 1.18 [95% CI 1.05-1.32]), female sex  
5 (OR 1.29 [95% CI 1.17-1.43]), smoking (OR 1.33 [95% CI 1.09-1.61]), history of depressive  
6 symptoms (OR 1.71 [95% CI 1.32-2.22]), history of anxiety symptoms (OR 1.22 [95% CI 1.09-  
7 1.36]), sleep difficulties (OR 2.32 [95% CI 1.46-3.69]), higher BMI as a continuous variable (OR  
8 1.02 [95% CI 1.01-1.03]), presence of preoperative pain (OR 1.21 [95% CI 1.10-1.32]), and use  
9 of preoperative analgesia (OR 1.54 [95% CI 1.18-2.03]). Pooled ORs and definition for each  
10 preoperative variable are shown in Table 2. Summary forest plots of significant preoperative  
11 predictors of poor postoperative pain control are presented in Figure 3. Significant heterogeneity  
12 was detected in 5 of these predictors (female sex, younger age, the presence of preoperative pain,  
13 history of anxiety symptoms, and smoking) with  $I^2$  values ranging from 50.4% to 82.4% (Table  
14 2). Detailed forest plots for each significant preoperative predictor are shown in online  
15 supplemental Figures S1 to S3.

#### 35 *Non-Significant Preoperative Predictors of Poor Postoperative Pain Control*

36  
37 Fourteen predictors were not significant in the final analysis: pain catastrophizing scale  
38 (exaggerated negative perception to painful stimuli) as a dichotomous variable, marital status,  
39 high BMI as a dichotomous variable, any previous surgical history, orthopedic surgery compared  
40 to abdominal surgery, diabetes, pain catastrophizing as a continuous variable, higher education,  
41 age as a continuous variable, chronic pain, American Society of Anesthesiologists (ASA)  
42 Physical Status, alcohol use, preoperative pressure pain tolerance and low socioeconomic status  
43 (Table 2). Detailed forest plots for each non-significant preoperative predictor are shown in  
44 online supplemental Figures S4 to S8.

1  
2  
3  
4  
5 Preoperative variables reported in only one study (and hence were excluded from the meta-  
6 analyses) included: patient weight, surgeon's anticipated pain level, self-assessment of good  
7 health, generalized self-efficacy scale, sedentary lifestyle, employment status, short portable  
8 mental status questionnaire, preoperative delirium (confusion assessment method), constipation,  
9  
10 rectal volume, body image scale, history of cancer, hypertension, heart disease, preoperative  
11 anemia, anticonvulsant medication, home sedatives, electrical pain threshold, heat pain  
12 threshold, von Frey pain intensity, blood type, preoperative 24 hour urinary cortisol level,  
13 thoracic surgery, spine surgery, head & neck surgery, and total knee replacement.  
14  
15  
16  
17  
18  
19  
20  
21  
22  
23  
24  
25

### 26 *Stratified Meta-Analysis and Meta-Regression*

27  
28 Stratified meta-analyses (according to the level of statistical adjustment, the definition of poor  
29 pain, surgical discipline, blinding of predictors, and location of pain assessment) showed no  
30 differences in the pooled estimates and therefore did not explain the significant level of  
31 heterogeneity observed between studies. These results were corroborated by meta-regression.  
32  
33 Repeating the analysis using least adjusted versus most adjusted models also found similar  
34 pooled results for each preoperative predictor.  
35  
36  
37  
38  
39  
40  
41  
42  
43  
44

## 45 **Discussion**

46  
47  
48 In this systematic review and meta-analysis of 33 studies, we identified 9 preoperative predictors  
49 that were negatively associated with pain control after surgery: young age, female sex, smoking,  
50 history of depressive symptoms, history of anxiety symptoms, sleep difficulties, higher BMI,  
51 presence of preoperative pain, and use of preoperative analgesia. The most well-studied  
52  
53  
54  
55  
56  
57  
58  
59  
60

1  
2  
3 predictors were female sex (number of studies, n=20), young age (n=14), and the presence of  
4  
5 preoperative pain (n=13). The strongest negative prognostic factors were a history of sleeping  
6  
7 difficulties (number of studies, n=2) and depression (n=8), which were independently associated  
8  
9 with approximately 2-fold higher odds of poor postoperative pain control. Our findings are  
10  
11 consistent with and extend the results of the previous systematic review by Ip and colleagues.<sup>20</sup>  
12  
13 In addition to the predictors previously described, we identified 6 additional preoperative  
14  
15 predictors of poor postoperative pain control.<sup>20</sup>  
16  
17  
18  
19  
20  
21

22 Previous reports have been inconsistent in their conclusions regarding the association of female  
23  
24 sex with worse pain prognosis after surgery.<sup>20 60</sup> Some have observed higher pain scores in  
25  
26 females,<sup>47 50 53 54</sup> whereas others failed to find such a difference between sexes.<sup>34 57 59</sup> In this  
27  
28 meta-analysis, we found females had an approximately 30% increased odds of poor  
29  
30 postoperative pain control compared to males. Sex differences may potentially relate to complex  
31  
32 psychosocial and biological factors, such as an increased willingness of women to communicate  
33  
34 pain,<sup>64</sup> and subjective differences in pain perception and experience.<sup>20</sup> Indeed, females are  
35  
36 reported to require 11% greater doses of morphine on average compared to males in order to  
37  
38 achieve adequate postoperative analgesia.<sup>65</sup> Furthermore, younger age (as a dichotomous  
39  
40 variable) was found to be a significant predictor for poor postoperative pain control. When  
41  
42 examined as a continuous variable, the point estimate also suggested older age was protective  
43  
44 (e.g., for every decade of age, there was an associated 30% decrease in the odds for poor  
45  
46 postoperative pain control), though this association was not statistically significant. Notably,  
47  
48 studies examining age as a continuous variable may not have been able to detect a statistically  
49  
50 significant difference because the majority of these studies were restricted to older patients and  
51  
52  
53  
54  
55  
56  
57  
58  
59  
60

1  
2  
3 few examined younger subjects. Further, it is possible that the association between age and  
4  
5 postoperative pain is non-linear. While sex and age are non-modifiable risk factors, this  
6  
7 knowledge can still be used to anticipate pain trajectories and individualize analgesia  
8  
9 requirements in the perioperative period.  
10  
11  
12  
13

14 Novel risk factors identified in this study included smoking, history of depressive symptoms,  
15  
16 preoperative analgesic use, and higher BMI. Smoking has been previously reported to be a  
17  
18 negative prognostic factor for pain control and a predictor of increased use of opioid analgesia.<sup>66</sup>  
19  
20

21 <sup>67</sup> Our finding implicating this modifiable risk factor in the setting of surgical pain supports the  
22  
23 undertaking of future interventional studies evaluating the impact of preoperative smoking  
24  
25 cessation programs on postoperative pain control. The presence of depression (whether self-  
26  
27 reported or measured with a validated scale) was also associated with worse pain outcomes.  
28  
29 Importantly, a wide spectrum of depression was represented by the included studies, and even  
30  
31 included subjects with relatively mild depressive symptoms.<sup>44</sup> Thus even mild or moderate levels  
32  
33 of depressive symptoms may be associated with an increased odds of poor postoperative pain  
34  
35 control. The use of preoperative analgesia, especially opioid therapy has been linked to poor  
36  
37 postoperative pain control in numerous studies.<sup>23 68</sup> This may be due to greater preoperative  
38  
39 severity of pain, opioid-induced hyperalgesia, and central or peripheral sensitization to pre-  
40  
41 existing nociception.<sup>23 69</sup> Further research on the impact of modifying these risk factors in the  
42  
43 pre- and peri-operative period is needed to determine its effect on improving postoperative pain  
44  
45 outcomes.  
46  
47  
48  
49  
50  
51  
52  
53

#### 54 *Strengths & Limitations*

55  
56  
57  
58  
59  
60

1  
2  
3  
4  
5 The strengths of our study are the comprehensive search of the literature, inclusion of 33 articles  
6 (resulting in data on more than 53,000 patients), and the ability to generate pooled estimates for a  
7  
8 large number of prognostic factors. The inclusion and stratification by multiple surgical  
9  
10 specialties and the diversity of geographic locations increase the generalizability of the findings.  
11  
12 However, the findings from the present report should be interpreted in the context of the study  
13  
14 design. First, the primary studies included in our systematic review and meta-analysis were  
15  
16 observational in nature. As is inherent to all observational designs, residual confounding cannot  
17  
18 be excluded. This was particularly the case for unadjusted estimates. Nonetheless, we found that  
19  
20 the most adjusted models yielded broadly similar results to the least adjusted estimates. Further,  
21  
22 we performed meta-analyses on studies that had appreciable heterogeneity as it pertains to  
23  
24 definition of poor postoperative pain control (which was variably defined by individual study  
25  
26 authors), surgical procedure/specialty, timing and instrument used for pain assessment, and  
27  
28 threshold used to categorize continuous preoperative predictors between studies (e.g., young vs.  
29  
30 old). Outcome heterogeneity may have been a potential source of bias if, for example, a  
31  
32 particular predictor was associated with an increased risk of postoperative pain with one  
33  
34 instrument (or cut-off) and a decreased risk of pain using a different instrument (or cut-off). In  
35  
36 such cases, a pooled analysis might fail to detect either finding. Although we do not believe this  
37  
38 issue biased our findings, future studies should attempt to standardize definitions (common data  
39  
40 elements) to facilitate comparisons between studies. For significant predictors that were  
41  
42 evaluated by a limited number of studies (e.g., sleep difficulty), future studies should be  
43  
44 performed to ensure reproducibility. Finally, there was significant statistical heterogeneity  
45  
46 between studies, which could not be explained by stratified analysis or meta-regression based on  
47  
48  
49  
50  
51  
52  
53  
54  
55  
56  
57  
58  
59  
60



1  
2  
3 a variety of clinical and study design factors (and the results should be interpreted with caution  
4  
5 for surgical discipline as there were limited number of studies in each group). This heterogeneity  
6  
7 was likely a product of important clinical differences as the included studies differed widely in  
8  
9 surgery type and case-mix. Additional research may further define the influence of specific types  
10  
11 of surgery on pain control.  
12  
13

## 14 15 16 17 **Conclusion**

18  
19  
20  
21 In conclusion, we identified and described 9 predictors of poor postoperative pain control in  
22  
23 patients undergoing surgery requiring hospital admission. Early identification of predictors in  
24  
25 patients at risk of poor postoperative pain control may allow for more individualized  
26  
27 interventions, better pain management, and decrease reliance on pain medications (particularly  
28  
29 opioids). Increased awareness of these predictors can also aid in the development of personalized  
30  
31 discipline-specific clinical care pathways (e.g., multimodal analgesic strategies and enhanced  
32  
33 recovery after surgery programs) to reduce length of stay and perioperative medical  
34  
35 complications by improving postoperative pain outcomes. In addition, there is a lack of  
36  
37 dedicated research in certain specialties such as spine surgery, plastic surgery, and  
38  
39 otolaryngology that should warrant further investigation. Although acute postoperative pain is  
40  
41 common, no standard criteria exist to classify outcomes. Future work is needed to develop  
42  
43 consensus criteria for acute postoperative pain outcomes, ideally as an international, multicenter  
44  
45 collaborative using the Delphi method. Future prospective (observational or interventional)  
46  
47 studies on acute postoperative pain control should consider addressing the predictors found in  
48  
49 this review.  
50  
51  
52  
53  
54  
55  
56  
57  
58  
59  
60

## Acknowledgement

We thank Dr. Diane Lorenzetti and Lorraine Toews for their assistance in developing the electronic database search strategy, Dr. Kelly Shinkaruk for her assistance in our literature search, and Dr. Alina Makoyeva for translating the non-English article.

For peer review only

## References

1. Berry PH, Dahl JL. The new JCAHO pain standards: implications for pain management nurses. *Pain Manag Nurs* 2000;1(1):3-12. doi: 10.1053/jpmn.2000.5833 [published Online First: 2001/11/15]
2. Weiser TG, Regenbogen SE, Thompson KD, et al. An estimation of the global volume of surgery: a modelling strategy based on available data. *Lancet* 2008;372(9633):139-44. doi: 10.1016/S0140-6736(08)60878-8 [published Online First: 2008/06/28]
3. Ciol MA, Deyo RA, Howell E, et al. An Assessment of Surgery for Spinal Stenosis: Time Trends, Geographic Variations, Complications, and Reoperations. *Journal of the American Geriatrics Society* 1996;44(3):285-90. doi: 10.1111/j.1532-5415.1996.tb00915.x
4. Etzioni DA, Liu JH, Maggard MA, et al. The aging population and its impact on the surgery workforce. *Annals of surgery* 2003;238(2):170.
5. Total knee and hip replacement surgery projections show meteoric rise by 2030. Orthopaedic procedures set to continue gaining widespread acceptance as means to restore quality-of-life. Annual Meeting of the American Academy of Orthopaedic Surgery; 2006.
6. McCarty CA, Keeffe JE, Taylor HR. The need for cataract surgery: projections based on lens opacity, visual acuity, and personal concern. *British Journal of Ophthalmology* 1999;83(1):62-65.
7. Sosa JA, Wang TS, Yeo HL, et al. The maturation of a specialty: workforce projections for endocrine surgery. *Surgery* 2007;142(6):876-83.
8. Wu JM, Kawasaki A, Hundley AF, et al. Predicting the number of women who will undergo incontinence and prolapse surgery, 2010 to 2050. *American journal of obstetrics and gynecology* 2011;205(3):230. e1-30. e5.
9. Kalkman CJ, Visser K, Moen J, et al. Preoperative prediction of severe postoperative pain. *Pain* 2003;105(3):415-23. [published Online First: 2003/10/07]
10. Radinovic K, Markovic-Denic L, Jovanovic B, et al. Predictors of severe pain in the immediate postoperative period in elderly patients following hip fracture surgery. *Regional Anesthesia and Pain Medicine* 2016;41 (5 Supplement 1):e92. doi: <http://dx.doi.org/10.1097/AAP.0000000000000469>
11. Caumo W, Broenstrup JC, Fialho L, et al. Risk factors for postoperative anxiety in children. *Acta Anaesthesiologica Scandinavica* 2000;44(7):782-9.
12. Sommer M, de Rijke JM, van Kleef M, et al. The prevalence of postoperative pain in a sample of 1490 surgical inpatients. *European journal of anaesthesiology* 2008;25(4):267-74. doi: 10.1017/s0265021507003031 [published Online First: 2007/12/07]
13. Peters CL, Shirley B, Erickson J. The effect of a new multimodal perioperative anesthetic regimen on postoperative pain, side effects, rehabilitation, and length of hospital stay after total joint arthroplasty. *The Journal of arthroplasty* 2006;21(6):132-38.
14. Sriwatanakul K, Weis OF, Alloza JL, et al. Analysis of narcotic analgesic usage in the treatment of postoperative pain. *JAMA* 1983;250(7):926-9. [published Online First: 1983/08/19]

15. Katz J, Jackson M, Kavanagh BP, et al. Acute pain after thoracic surgery predicts long-term post-thoracotomy pain. *Clin J Pain* 1996;12(1):50-5. [published Online First: 1996/03/01]
16. Lynch EP, Lazor MA, Gellis JE, et al. The impact of postoperative pain on the development of postoperative delirium. *Anesth Analg* 1998;86(4):781-5. [published Online First: 1998/04/16]
17. Perttunen K, Tasmuth T, Kalso E. Chronic pain after thoracic surgery: a follow-up study. *Acta Anaesthesiol Scand* 1999;43(5):563-7. [published Online First: 1999/05/26]
18. Zheng H, Schnabel A, Yahiaoui-Doktor M, et al. Age and preoperative pain are major confounders for sex differences in postoperative pain outcome: A prospective database analysis. *PLoS ONE* 2017;12 (6) (no pagination)(e0178659) doi: <http://dx.doi.org/10.1371/journal.pone.0178659>
19. Rehberg B, Mathivon S, Combescure C, et al. Prediction of acute postoperative pain following breast cancer surgery using the pain sensitivity questionnaire a cohort study. *Clinical Journal of Pain* 2017;33(1):57-66. doi: <http://dx.doi.org/10.1097/AJP.0000000000000380>
20. Ip HY, Abrishami A, Peng PW, et al. Predictors of postoperative pain and analgesic consumption: a qualitative systematic review. *Anesthesiology* 2009;111(3):657-77. doi: 10.1097/ALN.0b013e3181aae87a [published Online First: 2009/08/13]
21. Gorkem U, Togrtogrul C, Sahiner Y, et al. Preoperative anxiety may increase postcesarean delivery pain and analgesic consumption. *Minerva Anesthesiol* 2016;82(9):974-80.
22. Katz J, Poleshuck EL, Andrus CH, et al. Risk factors for acute pain and its persistence following breast cancer surgery. *Pain* 2005;119(1-3):16-25. doi: <https://dx.doi.org/10.1016/j.pain.2005.09.008>
23. Liu SS, Buvanendran A, Rathmell JP, et al. Predictors for moderate to severe acute postoperative pain after total hip and knee replacement. *Int Orthop* 2012;36(11):2261-7. doi: <https://dx.doi.org/10.1007/s00264-012-1623-5>
24. Nishimura D, Kosugi S, Onishi Y, et al. Psychological and endocrine factors and pain after mastectomy. *Eur J Pain* 2017;21(7):1144-53. doi: <https://dx.doi.org/10.1002/ejp.1014>
25. Stroup DF, Berlin JA, Morton SC, et al. Meta-analysis of observational studies in epidemiology: a proposal for reporting. Meta-analysis Of Observational Studies in Epidemiology (MOOSE) group. *JAMA* 2000;283(15):2008-12. [published Online First: 2000/05/02]
26. Shamseer L, Moher D, Clarke M, et al. Preferred reporting items for systematic review and meta-analysis protocols (PRISMA-P) 2015: elaboration and explanation. *Bmj* 2015;350:g7647. doi: 10.1136/bmj.g7647 [published Online First: 2015/01/04]
27. Liberati A, Altman DG, Tetzlaff J, et al. The PRISMA statement for reporting systematic reviews and meta-analyses of studies that evaluate health care interventions: explanation and elaboration. *Journal of clinical epidemiology* 2009;62(10):e1-34. doi: 10.1016/j.jclinepi.2009.06.006 [published Online First: 2009/07/28]
28. McGowan J, Sampson M, Salzwedel DM, et al. PRESS Peer Review of Electronic Search Strategies: 2015 Guideline Statement. *Journal of clinical epidemiology* 2016;75:40-6. doi: 10.1016/j.jclinepi.2016.01.021 [published Online First: 2016/03/24]
29. Altman DG. Systematic reviews of evaluations of prognostic variables. *Bmj* 2001;323(7306):224-8. [published Online First: 2001/07/28]

- 1
- 2
- 3
- 4 30. Egger M, Davey-Smith G, Altman D. Systematic reviews in health care: meta-analysis in
- 5 context: John Wiley & Sons 2008.
- 6 31. Katz J, Melzack R. Measurement of pain. *Surg Clin North Am* 1999;79(2):231-52. [published
- 7 Online First: 1999/06/03]
- 8 32. Jae Chul K, Jinae L, So Yeon K, et al. Postoperative Pain and Intravenous Patient-Controlled
- 9 Analgesia-Related Adverse Effects in Young and Elderly Patients: A Retrospective
- 10 Analysis of 10,575 Patients. *Medicine (Baltimore)* 2015;94(45):1-7. doi:
- 11 10.1097/MD.0000000000002008
- 12 33. Persson AKM, Dyrehag LE, Akeson J. Prediction of postoperative pain from electrical pain
- 13 thresholds after laparoscopic cholecystectomy. *Clinical Journal of Pain* 2017;33(2):126-
- 14 31. doi: <http://dx.doi.org/10.1097/AJP.0000000000000394>
- 15 34. Rakel BA, Blodgett NP, Bridget Zimmerman M, et al. Predictors of postoperative movement
- 16 and resting pain following total knee replacement. *Pain* 2012;153(11):2192-203. doi:
- 17 <https://dx.doi.org/10.1016/j.pain.2012.06.021>
- 18 35. Hayden JA, Cote P, Bombardier C. Evaluation of the quality of prognosis studies in
- 19 systematic reviews. *Ann Intern Med* 2006;144(6):427-37. [published Online First:
- 20 2006/03/22]
- 21 36. Laupacis A, Wells G, Richardson WS, et al. Users' guides to the medical literature. V. How
- 22 to use an article about prognosis. Evidence-Based Medicine Working Group. *JAMA*
- 23 1994;272(3):234-7. [published Online First: 1994/07/20]
- 24 37. Zhang J, Kai FY. What's the relative risk?: A method of correcting the odds ratio in cohort
- 25 studies of common outcomes. *Jama* 1998;280(19):1690-91.
- 26 38. Higgins JP, Thompson SG, Deeks JJ, et al. Measuring inconsistency in meta-analyses. *Bmj*
- 27 2003;327(7414):557-60. doi: 10.1136/bmj.327.7414.557 [published Online First:
- 28 2003/09/06]
- 29 39. Alves ML, Vieira JE, Mathias LA, et al. Preoperative coping mechanisms have no predictive
- 30 value for postoperative pain in breast cancer. *Rev Bras Psiquiatr* 2013;35(4):364-8. doi:
- 31 <https://dx.doi.org/10.1590/1516-4446-2012-0934>
- 32 40. Aubrun F, Valade N, Coriat P, et al. Predictive factors of severe postoperative pain in the
- 33 postanesthesia care unit. 2008;106(5):1535-41, table of contents. doi:
- 34 <https://dx.doi.org/10.1213/ane.0b013e318168b2ce>
- 35 41. Baudic S, Jayr C, Albi-Feldzer A, et al. Effect of Alexithymia and Emotional Repression on
- 36 Postsurgical Pain in Women With Breast Cancer: A Prospective Longitudinal 12-Month
- 37 Study. *J Pain* 2016;17(1):90-100. doi: 10.1016/j.jpain.2015.10.001
- 38 42. Belii N, Moghildea V, Sandru S, et al. Anxiety, but not pain catastrophizing, represents a risk
- 39 factor for severe acute postoperative pain: A prospective, observational, cohort study.
- 40 *Jurnalul Roman de Anestezie Terapie Intensiva/Romanian Journal of Anaesthesia and*
- 41 *Intensive Care* 2014;21(1):19-26.
- 42 43. Borges NC, Pereira LV, de Moura LA, et al. Predictors for Moderate to Severe Acute
- 43 Postoperative Pain after Cesarean Section. *Pain Res Manag* 2016;2016:5783817. doi:
- 44 <https://dx.doi.org/10.1155/2016/5783817>
- 45 44. Caumo W, Schmidt AP, Schneider CN, et al. Preoperative predictors of moderate to intense
- 46 acute postoperative pain in patients undergoing abdominal surgery. *Acta*
- 47 *Anaesthesiologica Scandinavica* 2002;46(10):1265-71.
- 48
- 49
- 50
- 51
- 52
- 53
- 54
- 55
- 56
- 57
- 58
- 59
- 60

- 1
- 2
- 3
- 4 45. Duan G, Guo S, Zhang Y, et al. Effects of Epidemiological Factors and Pressure Pain
- 5 Measurements in Predicting Postoperative Pain: A Prospective Survey of 1,002 Chinese
- 6 Patients. *Pain physician* 2017;20(6):E903-E14.
- 7 46. Genov PG, Smirnova OV, Glushchenko NS, et al. Predicting of postoperative pain level and
- 8 morphine consumption by preoperative pressure pain assessment in patients before
- 9 elective surgery. [Russian]. *Anesteziol Reanimatol* 2015;60(1):11-16.
- 10 47. Gerbershagen HJ, Pogatzki-Zahn E, Aduckathil S, et al. Procedure-specific risk factor
- 11 analysis for the development of severe postoperative pain. *Anesthesiology*
- 12 2014;120(5):1237-45. doi: <https://dx.doi.org/10.1097/ALN.000000000000108>
- 13 48. Jasim HA, Sulaiman SABS, Khan Ah, et al. Factors affecting post caesarean pain intensity
- 14 among women in the northern peninsular of Malaysia. *Journal of Clinical and Diagnostic*
- 15 *Research* 2017;11(9):IC07-IC11. doi: <http://dx.doi.org/10.7860/JCDR/2017/25364.10630>
- 16 49. Kim S, Jung S, Choe J, et al. Predictive Factors for Pain After Endoscopic Resection of
- 17 Gastric Tumors. *Dig Dis Sci* 2016;61(12):3560-64. doi: 10.1007/s10620-016-4325-9
- 18 50. Lesin M, Lozo MD, Duplancic-Sundov Z, et al. Risk factors associated with postoperative
- 19 pain after ophthalmic surgery: A prospective study. *Therapeutics and Clinical Risk*
- 20 *Management* 2016;12:93-102. doi: <http://dx.doi.org/10.2147/TCRM.S97024>
- 21 51. Lunn TH, Gaarn-Larsen L, Kehlet H. Prediction of postoperative pain by preoperative pain
- 22 response to heat stimulation in total knee arthroplasty. *Pain* 2013;154(9):1878-85. doi:
- 23 <https://dx.doi.org/10.1016/j.pain.2013.06.008>
- 24 52. Mamie C, Bernstein M, Morabia A, et al. Are there reliable predictors of postoperative pain?
- 25 *Acta Anaesthesiologica Scandinavica* 2004;48(2):234-42. doi:
- 26 <http://dx.doi.org/10.1111/j.0001-5172.2004.00298.x>
- 27 53. Mei W, Seeling M, Franck M, et al. Independent risk factors for postoperative pain in need of
- 28 intervention early after awakening from general anaesthesia. *Eur J Pain* 2010;14(2):e1-
- 29 e7. doi: <http://dx.doi.org/10.1016/j.ejpain.2009.03.009>
- 30 54. Murray AA, Retief FW. Acute postoperative pain in 1 231 patients at a developing country
- 31 referral hospital: Incidence and risk factors. *Southern African Journal of Anaesthesia and*
- 32 *Analgesia* 2016;22(1):26-31. doi: <http://dx.doi.org/10.1080/22201181.2015.1115608>
- 33 55. Orbach-Zinger S, Fireman S, Ben-Haroush A, et al. Preoperative sleep quality predicts
- 34 postoperative pain after planned caesarean delivery. *European Journal of Pain (United*
- 35 *Kingdom)* 2017;21(5):787-94. doi: <http://dx.doi.org/10.1002/ejp.980>
- 36 56. Petrovic NM, Milovanovic DR, Ignjatovic Ristic D, et al. Factors associated with severe
- 37 postoperative pain in patients with total hip arthroplasty. *Acta Orthop Traumatol Turc*
- 38 2014;48(6):615-22. doi: <https://dx.doi.org/10.3944/AOTT.2014.14.0177>
- 39 57. Radinovic K, Milan Z, Markovic-Denic L, et al. Predictors of severe pain in the immediate
- 40 postoperative period in elderly patients following hip fracture surgery. *Injury*
- 41 2014;45(8):1246-50. doi: <https://dx.doi.org/10.1016/j.injury.2014.05.024>
- 42 58. Robleda G, Sillero-Sillero A, Puig T, et al. Influence of preoperative emotional state on
- 43 postoperative pain following orthopedic and trauma surgery. *Revista Latino-Americana*
- 44 *de Enfermagem (RLAE)* 2014;22(5):785-91. doi: 10.1590/0104-1169.0118.2481
- 45 59. Sanansilp V, Dejarkom S, Deetayart S. Postoperative pain management and the risk factors
- 46 in major operation: A baseline study of acute pain service, Siriraj Hospital. *J Med Assoc*
- 47 *Thai* 2016;99(5):549-56.
- 48
- 49
- 50
- 51
- 52
- 53
- 54
- 55
- 56
- 57
- 58
- 59
- 60

- 1  
2  
3  
4  
5  
6  
7  
8  
9  
10  
11  
12  
13  
14  
15  
16  
17  
18  
19  
20  
21  
22  
23  
24  
25  
26  
27  
28  
29  
30  
31  
32  
33  
34  
35  
36  
37  
38  
39  
40  
41  
42  
43  
44  
45  
46  
47  
48  
49  
50  
51  
52  
53  
54  
55  
56  
57  
58  
59  
60
60. Sommer M, de Rijke JM, van Kleef M, et al. Predictors of acute postoperative pain after elective surgery. *Clinical Journal of Pain* 2010;26(2):87-94. doi: <https://dx.doi.org/10.1097/AJP.0b013e3181b43d68>
  61. Storesund A, Krukhaug Y, Olsen MV, et al. Females report higher postoperative pain scores than males after ankle surgery. *Scand J Pain* 2016;12:85-93. doi: <https://dx.doi.org/10.1016/j.sjpain.2016.05.001>
  62. Tighe PJ, Riley JL, 3rd, Fillingim RB. Sex differences in the incidence of severe pain events following surgery: a review of 333,000 pain scores. *Pain Med* 2014;15(8):1390-404. doi: <https://dx.doi.org/10.1111/pme.12498>
  63. Zhao Y, Ding JH, Yin SH, et al. Predictors of early postoperative pain after stapled haemorrhoidopexy. *Colorectal Dis* 2014;16(6):O206-11. doi: <https://dx.doi.org/10.1111/codi.12531>
  64. Barsky AJ, Peekna HM, Borus JF. Somatic symptom reporting in women and men. *J Gen Intern Med* 2001;16(4):266-75. [published Online First: 2001/04/25]
  65. Aubrun F, Salvi N, Coriat P, et al. Sex- and age-related differences in morphine requirements for postoperative pain relief. *Anesthesiology* 2005;103(1):156-60. [published Online First: 2005/06/29]
  66. Chiang HL, Chia YY, Lin HS, et al. The Implications of Tobacco Smoking on Acute Postoperative Pain: A Prospective Observational Study. *Pain Res Manag* 2016;2016:9432493. doi: 10.1155/2016/9432493 [published Online First: 2016/07/23]
  67. Creekmore FM, Lugo RA, Weiland KJ. Postoperative opiate analgesia requirements of smokers and nonsmokers. *Ann Pharmacother* 2004;38(6):949-53. doi: 10.1345/aph.1D580 [published Online First: 2004/04/29]
  68. Kampe S, Wendland M, Welter S, et al. Independent Predictors for Higher Postoperative Pain Intensity During Recovery After Open Thoracic Surgery: A Retrospective Analysis in 621 Patients. *Pain Medicine* 2017;pnx238-pnx38. doi: 10.1093/pm/pnx238
  69. Angst MS, Clark JD. Opioid-induced hyperalgesia: a qualitative systematic review. *Anesthesiology* 2006;104(3):570-87. [published Online First: 2006/03/02]

**Table 1. Study characteristics of included studies.**

| Author, Year                           | Country of Origin | Sample Size | Incidence of Poor Post-operative Pain Control (%) | Mean Age in Years (SD)               | Study Design | Setting of Pain Assessment | Pain Scale* | Definition of Poor Pain Control | Time of Assessment <sup>d</sup> | Specialty | Pathology                             | No. of Predictors Examined |
|----------------------------------------|-------------------|-------------|---------------------------------------------------|--------------------------------------|--------------|----------------------------|-------------|---------------------------------|---------------------------------|-----------|---------------------------------------|----------------------------|
| Alves et al, 2013 <sup>39</sup>        | Brazil            | 139         | Not stated                                        | 51.7 (11.8)                          | PCS          | Ward                       | VAS         | >30                             | 24                              | GS        | Breast cancer                         | 3                          |
| Auburn et al, 2008 <sup>40</sup>       | France            | 342         | 41.5                                              | 48 (18)                              | PCS          | PACU                       | VAS & NRS   | Morphine >0.15mg/kg in PACU     | <24 hours                       | Mixed     | Mixed                                 | 3                          |
| Baudic et al, 2016 <sup>41</sup>       | France            | 100         | 14.0                                              | 55.2 (12.1)                          | PCS          | Ward                       | BPI         | ≥3                              | 48                              | GS        | Breast cancer                         | 9                          |
| Belii et al, 2014 <sup>42</sup>        | Moldolva          | 176         | Not stated                                        | Not stated                           | PCS          | Ward                       | NRS         | ≥5                              | 24                              | GS        | Abdominal pathologies                 | 3                          |
| Borges et al, 2016 <sup>43</sup>       | Brazil            | 1,062       | 78.4                                              | 25.1 (5.7)                           | PCS          | Ward                       | NRS         | ≥5                              | Immediate postoperative period  | Obstetric | Non-emergent cesarean section         | 14                         |
| Camuo et al, 2002 <sup>44</sup>        | Brazil            | 346         | 43.4                                              | 44.3 (9.6)                           | PCS          | PACU                       | VAS         | >30                             | 24                              | GS        | Abdominal pathologies                 | 15                         |
| Duan et al, 2017 <sup>45</sup>         | China             | 1002        | 15.5                                              | 49.5 (11.6)                          | PCS          | Ward                       | NRS         | ≥4                              | 24                              | Mixed     | Mixed                                 | 3                          |
| Genov et al, 2015 <sup>46</sup>        | Russia            | 321         | Not stated                                        | Not stated                           | RCS          | PACU                       | VAS         | >4                              | 12                              | Mixed     | Mixed                                 | 1                          |
| Gerbershagen et al, 2014 <sup>47</sup> | Germany           | 22,963      | 24.5                                              | 55.2 <sup>a</sup>                    | PCS          | Ward                       | NRS         | ≥7                              | 24                              | Mixed     | Mixed                                 | 3                          |
| Gorkem et al, 2016 <sup>21</sup>       | Turkey            | 80          | Not stated                                        | 29.7 (5.8)                           | PCS          | Ward                       | VAS         | >40                             | 18                              | Obstetric | Non-emergent cesarean section         | 16                         |
| Jae Chul et al, 2015 <sup>32, c</sup>  | Korea             | 10,575      | Not stated                                        | Young: 31.8 (5.8)<br>Old: 74.8 (4.4) | RCS          | Ward                       | NRS         | >4                              | 48                              | Mixed     | Mixed                                 | 5                          |
| Jasim et al, 2017 <sup>48</sup>        | Malaysia          | 400         | Not stated                                        | 30.4 (4.8)                           | RCS          | PACU and Ward              | VAS         | Not stated                      | 12                              | Obstetric | Non-emergent cesarean section         | 7                          |
| Katz et al, 2005 <sup>22</sup>         | United States     | 109         | 54.1                                              | 58.2 (12)                            | PCS          | Ward                       | NRS         | ≥5                              | 48                              | GS        | Breast cancer                         | 17                         |
| Kim et al, 2016 <sup>49</sup>          | United Kingdom    | 156         | 42.3                                              | 64.4 (10.9)                          | PCS          | Ward                       | NRS         | ≥5                              | 48                              | GS        | Gastric tumors (endoscopic resection) | 11                         |
| Lesin et al, 2016 <sup>50</sup>        | Croatia           | 226         | 19.9                                              | 67 (13)                              | PCS          | Ward                       | NRS         | ≥5                              | 6                               | Ophtho    | Ophthalmologic pathologies            | 19                         |



|                                         |               |       |                                          |                                                          |                  |      |                                             |                              |                  |            |                                       |    |
|-----------------------------------------|---------------|-------|------------------------------------------|----------------------------------------------------------|------------------|------|---------------------------------------------|------------------------------|------------------|------------|---------------------------------------|----|
| Liu et al, 2012 <sup>23, c</sup>        | United States | 897   | At rest: 22.4<br>Movement: 39.0          | 67 (11)                                                  | RCS <sup>e</sup> | Ward | NRS at rest & with activity VAS (activity ) | >4                           | 24               | Orthopedic | Primary total hip or knee replacement | 17 |
| Lunn et al, 2013 <sup>51</sup>          | Denmark       | 92    | 39.1                                     | Median 66 (IQR:13)                                       | PCS              | Ward |                                             | ≥60                          | 6-24             | Orthopedic | Total knee arthroplasty               | 4  |
| Mamie et al, 2004 <sup>52</sup>         | Switzerland   | 304   | 25.1                                     | 45 <sup>a</sup>                                          | PCS              | Ward | VAS                                         | >5                           | 24               | Mixed      | Abdominal and orthopedic pathologies  | 10 |
| Mei et al, 2010 <sup>53</sup>           | Germany       | 1,736 | 28.5                                     | Not stated                                               | PCS              | PACU | NRS                                         | >4                           | After extubation | Mixed      | Mixed                                 | 10 |
| Murray et al, 2016 <sup>54</sup>        | South Africa  | 1,231 | 61.9                                     | 44 <sup>b</sup>                                          | PCS              | Ward | VAS                                         | >40                          | 24               | Mixed      | Mixed                                 | 8  |
| Nishimura et al 2017 <sup>24</sup>      | Japan         | 64    | 48.4                                     | 60 (11)                                                  | PCS              | Ward | VAS                                         | >40                          | 6-60             | GS         | Partial mastectomy for cancer         | 8  |
| Orbach-Zinger, et al 2016 <sup>55</sup> | Israel        | 245   | Good sleeper: 12.8<br>Poor sleeper: 27.5 | Good sleeper: 34.9 (4.9)<br>Poor sleeper: 34.1 (4.9)     | PCS              | Ward | VRS                                         | >7                           | 24               | Obstetric  | Non-emergent cesarean section         | 3  |
| Persson et al, 2017 <sup>33, c</sup>    | Sweden        | 152   | Not stated                               | Median 49 (IQR: 29)                                      | PCS              | PACU | VAS                                         | >40                          | 1.5              | GS         | Laparoscopic cholecystectomy          | 2  |
| Petrovic et al, 2014 <sup>56</sup>      | Serbia        | 90    | 48.9                                     | High pain group: 64.2 (3.8),<br>Low pain group: 69 (3.9) | PCS              | Ward | NRS                                         | ≥5                           | 12               | Orthopedic | Total hip arthroplasty                | 15 |
| Radinovic et al, 2014 <sup>57</sup>     | Serbia        | 234   | Not stated                               | 71.2 (8.3)                                               | PCS              | PACU | NRS                                         | ≥7                           | 1                | Orthopedic | Hip fractures                         | 14 |
| Rakel et al, 2012 <sup>34, c</sup>      | United States | 215   | Moderate pain: 46.0<br>Severe pain: 27.0 | 61.7 (9.8)                                               | PCS              | Ward | NRS (0-21)                                  | 8-14 (mod)<br>15-20 (severe) | 48               | Orthopedic | Total knee arthroplasty               | 17 |
| Rehberg et al, 2017 <sup>19</sup>       | Switzerland   | 198   | 44.9                                     | 57.5 (12.5)                                              | PCS              | Ward | NRS                                         | >3                           | 24               | GS         | Breast cancer                         | 15 |

|                                     |               |       |      |                                                  |                  |               |             |     |                                 |            |                                 |    |
|-------------------------------------|---------------|-------|------|--------------------------------------------------|------------------|---------------|-------------|-----|---------------------------------|------------|---------------------------------|----|
| Robleda et al, 2014 <sup>58</sup>   | Spain         | 127   | 61.0 | 71.0 (18)                                        | RCS              | PACU          | NRS         | ≥4  | Immediate in PACU               | Orthopedic | Femur fractures and prosthetics | 15 |
| Sananslip et al, 2016 <sup>59</sup> | Thailand      | 340   | 28.5 | 54.8 (17.8)                                      | PCS              | Ward          | NRS         | ≥4  | 24-48                           | Mixed      | Mixed                           | 12 |
| Sommer et al, 2010 <sup>60</sup>    | Netherlands   | 1,300 | 30.2 | 56 (15.5)                                        | PCS              | Ward          | VAS         | >40 | 24                              | Mixed      | Mixed                           | 15 |
| Storesund et al, 2016 <sup>61</sup> | Norway        | 336   | 67.3 | 52 <sup>b</sup>                                  | RCS <sup>e</sup> | PACU          | VAS or vNRS | ≥4  | At time of transfer out of PACU | Orthopedic | Ankle fractures                 | 15 |
| Tighe et al, 2014 <sup>62</sup>     | United States | 7,731 | 60.9 | Female: 56.4 <sup>b</sup> Male 56.6 <sup>b</sup> | RCS              | Ward          | NRS         | ≥7  | 24                              | Mixed      | Mixed                           | 1  |
| Zhao et al, 2014 <sup>63</sup>      | China         | 73    | 58.9 | Median 43 (IQR:57)                               | PCS              | PACU and Ward | VAS         | >30 | 24                              | GS         | Hemorrhoids                     | 12 |

\*Pain measured at rest, unless otherwise stated.

<sup>a</sup> Authors' estimate (study only included age ranges).

<sup>b</sup> Variance not stated.

<sup>c</sup> Studies which divided their dataset into two groups when evaluating predictors: Jae Chul et al: young vs old age group; Liu et al: NRS at rest vs with activity; Persson et al: female vs male; Rakel et al: moderate vs severe pain outcome.

<sup>d</sup> Time of assessment measured in hours.

<sup>e</sup> Labelled as a cross-sectional study design by study authors, but methodology more represent a retrospective cohort study design.

BPI- Brief pain index (0-10), VAS- Visual Analogue Scale for Pain (0-100mm), NRS- Numeric Rating Scale for Pain (0-10), vNRS- Verbal Numeric, Rating Scale for Pain (0-10), Mixed- more than one specialty or pathology, PCS- Prospective Cohort Study, RCS-Retrospective Cohort Study, and GS- General Surgery

**Table 2. Pooled odds ratios and definitions of preoperative predictors of poor postoperative pain control.**

| Preoperative predictor         | No. of studies included in pooled estimate | No. of patients | Odds ratio (95% CI) | p-value | I <sup>2</sup> statistic | Definition                                                                                                                                                                                                    |
|--------------------------------|--------------------------------------------|-----------------|---------------------|---------|--------------------------|---------------------------------------------------------------------------------------------------------------------------------------------------------------------------------------------------------------|
| Younger age                    | 14                                         | 5,577           | 1.18 (1.05 to 1.32) | <0.001  | 79.7%*                   | Authors' cutoff (range ≤31 to <70 years)                                                                                                                                                                      |
| Female sex                     | 20                                         | 48,753          | 1.29 (1.17 to 1.43) | <0.001  | 71%*                     | Female sex                                                                                                                                                                                                    |
| Smoking                        | 9                                          | 15,764          | 1.33 (1.09 to 1.61) | 0.005   | 55.8%*                   | Self-reported (any amount)                                                                                                                                                                                    |
| History of depressive symptoms | 8                                          | 3,042           | 1.71 (1.32 to 2.21) | 0.018   | 12.6%                    | Self-reported, any use of antidepressants or at least moderate score on depression scale (Hamilton Depression Rating Scale ≥19, Montgomery-Asberg Depression Rating Scale >13, Geriatric Depression Scale >6) |
| History of anxiety symptoms    | 10                                         | 2,598           | 1.22 (1.09 to 1.36) | 0.001   | 82.4%*                   | Self-reported or moderate to severe score on anxiety scale (State Anxiety Inventory ≥30 to >46, Hamilton Anxiety Scale ≥25, Numeric Rating Scale for Anxiety ≥5)                                              |
| Sleep difficulty               | 2                                          | 549             | 2.32 (1.46 to 3.69) | <0.001  | 0%                       | Self-reported chronic sleep difficulties or score >5 on the Pittsburgh Sleep Quality Index                                                                                                                    |
| BMI (continuous)               | 2                                          | 1,095           | 1.02 (1.01 to 1.03) | <0.001  | 0%                       | BMI as a continuous variable                                                                                                                                                                                  |
| Presence of preoperative pain  | 13                                         | 4,733           | 1.21 (1.10-1.32)    | <0.001  | 50.4%*                   | Self-reported, any preoperative pain                                                                                                                                                                          |
| Preoperative analgesia use     | 6                                          | 2,448           | 1.54 (1.18 to 2.03) | 0.002   | 44.0%                    | Self-reported use of preoperative analgesia or opioids                                                                                                                                                        |
| Age (continuous)               | 9                                          | 26,846          | 0.97 (0.93 to 1.01) | 0.16    | 93.5%*                   | Age as a continuous variable                                                                                                                                                                                  |
| Higher education               | 8                                          | 2,272           | 0.97 (0.69 to 1.38) | 0.89    | 43.4%                    | Authors' cutoff from self-reported levels of education (range: >9 years of education to college or postgraduate degree)                                                                                       |
| History of surgery             | 8                                          | 3,954           | 1.15 (0.97 to 1.37) | 0.10    | 33.9%                    | Any self-reported previous surgical history                                                                                                                                                                   |
| Alcohol use                    | 5                                          | 3,851           | 0.89 (0.72 to 1.11) | 0.29    | 26.2%                    | Self-reported alcohol use (range from any to dependence)                                                                                                                                                      |
| Low ASA physical status        | 5                                          | 3,629           | 0.94 (0.59 to 1.51) | 0.80    | 79.0%*                   | ASA I compared to II or III                                                                                                                                                                                   |
| High BMI (dichotomous)         | 5                                          | 1,926           | 1.23 (0.98 to 1.55) | 0.069   | 66.5%*                   | Authors' cutoff (range from >30 to >40 kg/m <sup>2</sup> )                                                                                                                                                    |
| Chronic pain                   | 4                                          | 1,583           | 0.96 (0.65 to 1.42) | 0.84    | 59.5%                    | Self-reported chronic pain                                                                                                                                                                                    |
| Diabetes                       | 4                                          | 1,287           | 1.02 (0.73 to 1.42) | 0.90    | 0%                       | Self-reported history of diabetes                                                                                                                                                                             |

|                                          |   |        |                     |      |        |                                                                                                                                                              |
|------------------------------------------|---|--------|---------------------|------|--------|--------------------------------------------------------------------------------------------------------------------------------------------------------------|
| Pain catastrophizing scale (continuous)  | 4 | 407    | 1.02 (0.98 to 1.05) | 0.37 | 64.8%* | Pain Catastrophizing Scale scores as a continuous variable                                                                                                   |
| Marital status                           | 3 | 1,571  | 1.42 (0.62 to 3.23) | 0.41 | 60.1%  | Self-reported as single or not married                                                                                                                       |
| Orthopedic procedure                     | 3 | 10,879 | 1.06 (0.72 to 1.57) | 0.77 | 76.3%* | Orthopedic procedure compared to abdominal surgery                                                                                                           |
| Preoperative pressure pain tolerance     | 3 | 536    | 0.85 (0.69 to 1.06) | 0.14 | 81.0%* | Preoperative pressure pain tolerance as measured by Wagner Force Ten Digital Force Gage FPX 50 or hand-held pressure algometer (Somedic AB, Farsta, Sweden). |
| Low socioeconomic status                 | 2 | 1,288  | 0.85 (0.49 to 1.47) | 0.56 | 0%     | Brazilian Economic Classification Criteria Classes D or E or monthly family net income less than 750 US dollars                                              |
| Pain catastrophizing scale (dichotomous) | 2 | 1,476  | 1.47 (0.67 to 3.22) | 0.34 | 73.0%  | Authors' cutoff (range from $\geq$ or $>15$ )                                                                                                                |

\*significant Cochran Q test ( $p < 0.05$ )

BMI- body mass index ( $\text{kg}/\text{m}^2$ )

ASA- American Society of Anesthesiologist

CI- confidence interval

## Figure Legends

**Figure 1. Systematic Review & Meta-Analysis Flow Diagram.** All database and grey literature search was performed on October 13<sup>th</sup>, 2017.

**Figure 2. Assessment of study quality.** 1: adequate description of population, 2: non-biased selection, 3: adequate predictor measurement, 4: adequate outcome measurement, 5: blinded outcome assessment (to predictor), 6: adequate statistical adjustment, 7: precision of results, 8: reference standard, and 9: low loss to follow up. Green: low-risk of bias, yellow: unclear-risk of bias, red: high-risk of bias.

**Figure 3. Summary forest plot for significant preoperative predictors of poor postoperative pain control.** Odds ratios are shown with 95 percent confidence intervals. The number of studies included in the meta-analysis for each predictor is indicated.

**Figure S1. Forest Plot of Preoperative Predictors of Postoperative Pain.** a) female sex b) younger age, and c) smoking history.

**Figure S2. Forest Plot of Significant Preoperative Predictors of Postoperative Pain.** a) history of depression symptoms, b) presence of preoperative pain, and c) history of anxiety symptoms.

**Figure S3. Forest Plot of Significant Preoperative Predictors of Postoperative Pain.** a) preoperative analgesia, b) body mass index (continuous), and c) history of sleeping difficulty.

**Figure S4. Forest Plot of Non-Significant Preoperative Predictors of Postoperative Pain.** a) age (continuous), b) higher education, and c) history of surgery.

1  
2  
3  
4 **Figure S5. Forest Plot of Non-Significant Preoperative Predictors of Postoperative Pain.** a)

5  
6 alcohol use, b) low ASA, and c) BMI (dichotomous).  
7  
8  
9

10  
11 **Figure S6. Forest Plot of Non-Significant Preoperative Predictors of Postoperative Pain.** a)

12  
13 chronic pain, b) diabetes, and c) pain catastrophizing scale (continuous).  
14  
15

16  
17  
18 **Figure S7. Forest Plot of Non-Significant Preoperative Predictors of Postoperative Pain.** a) marital

19  
20 status, b) orthopedic surgery, and c) preoperative pressure tolerance.  
21  
22

23  
24  
25 **Figure S8. Forest Plot of Non-Significant Preoperative Predictors of Postoperative Pain.** a) low

26  
27 socioeconomic status and b) pain catastrophizing scale (dichotomous).  
28  
29  
30  
31  
32  
33  
34  
35  
36  
37  
38  
39  
40  
41  
42  
43  
44  
45  
46  
47  
48  
49  
50  
51  
52  
53  
54  
55  
56  
57  
58  
59  
60

1  
2 **Table Legend**  
3  
4  
5  
6

7 **Table 1. Study characteristics of included studies.**  
8  
9

10  
11  
12 **Table 2. Pooled odds ratios and definitions of preoperative predictors of poor postoperative pain**  
13 **control.**  
14  
15

16  
17  
18 **Table S1. Quality indicators for studies of prognosis.<sup>35</sup>**  
19  
20  
21  
22  
23  
24  
25  
26  
27  
28  
29  
30  
31  
32  
33  
34  
35  
36  
37  
38  
39  
40  
41  
42  
43  
44  
45  
46  
47  
48  
49  
50  
51  
52  
53  
54  
55  
56  
57  
58  
59  
60

1  
2  
3  
4  
5  
6  
7  
8  
9  
10  
11  
12  
13  
14  
15  
16  
17  
18  
19  
20  
21  
22  
23  
24  
25  
26  
27  
28  
29  
30  
31  
32  
33  
34  
35  
36  
37  
38  
39  
40  
41  
42  
43  
44  
45  
46  
47  
48  
49  
50  
51  
52  
53  
54  
55  
56  
57  
58  
59  
60

**Appendix Legend**

**Appendix S1. Database Search Strategy.** Themes were combined with Boolean operator “and” and within-theme were combined with Boolean operator “or”.

For peer review only



## Author Statement

All authors satisfy the requirement for authorship as per ICMJE.

MMY: conception and design of work; acquisition, analysis and interpretation of data; drafting initial draft of manuscript; critical review and final approval of manuscript.

RLH: design of work; acquisition, analysis and interpretation of data; critical review and final approval of manuscript.

AAL: design of work; analysis and interpretation of data; critical review and final approval of manuscript.

PER: design of work; analysis and interpretation of data; critical review and final approval of manuscript.

NJ: design of work; interpretation of data; critical review and final approval of manuscript.

SC: design of work; interpretation of data; critical review and final approval of manuscript.

JC: design of work; interpretation of data; critical review and final approval of manuscript.

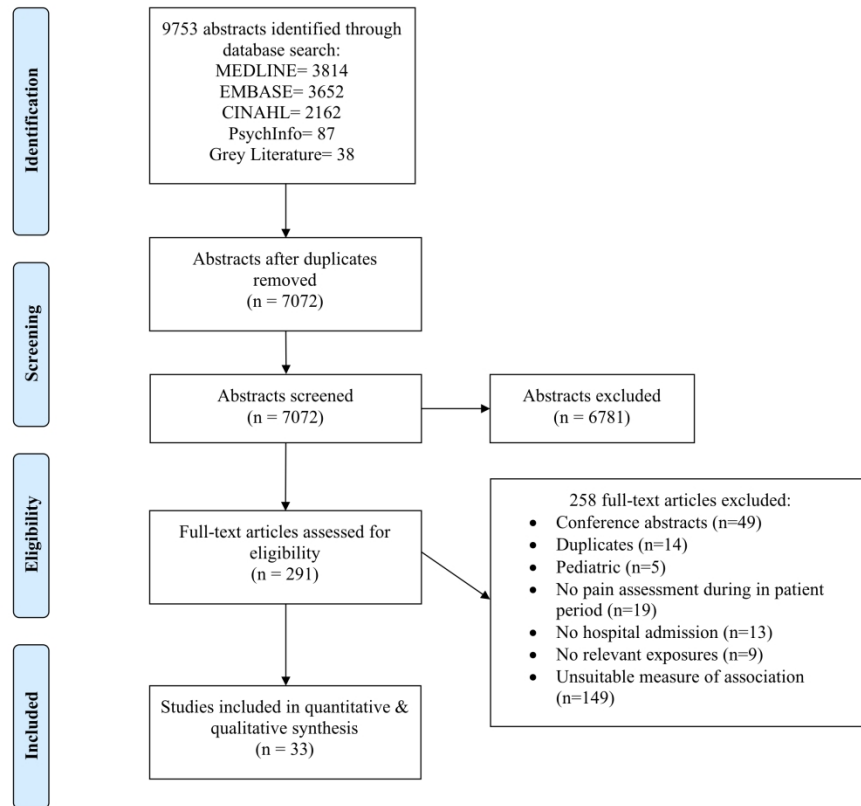

45 Figure 1. Systematic Review & Meta-Analysis Flow Diagram. All database and grey literature search was  
46 performed on October 13th, 2017.

47 215x279mm (300 x 300 DPI)

1  
2  
3  
4  
5  
6  
7  
8  
9  
10  
11  
12  
13  
14  
15  
16  
17  
18  
19  
20  
21  
22  
23  
24  
25  
26  
27  
28  
29  
30  
31  
32  
33  
34  
35  
36  
37  
38  
39  
40  
41  
42  
43  
44  
45  
46  
47  
48  
49  
50  
51  
52  
53  
54  
55  
56  
57  
58  
59  
60

|                    | 1 | 2 | 3 | 4 | 5 | 6 | 7 | 8 | 9 |
|--------------------|---|---|---|---|---|---|---|---|---|
| Alves 2013         | + | + | + | + | ? | - | + | + | + |
| Auburn 2008        | + | ? | + | + | ? | - | + | + | + |
| Baudic 2016        | + | + | + | - | ? | + | + | + | + |
| Belii 2014         | + | + | + | + | ? | - | + | + | + |
| Borges 2016        | + | + | - | + | ? | - | + | + | + |
| Camuo 2012         | + | + | + | + | + | + | + | + | + |
| Duan 2017          | + | ? | + | + | ? | + | + | + | + |
| Genov 2015         | + | + | + | + | ? | + | + | + | + |
| Gerbershagen 2014  | + | + | + | + | + | - | + | + | + |
| Gorkem 2016        | + | + | - | + | + | - | + | + | + |
| Jae Chul 2015      | + | + | + | + | - | + | + | + | + |
| Jasim 2017         | + | + | + | + | ? | + | + | - | + |
| Katz 2005          | + | + | + | + | ? | + | + | + | + |
| Kim 2016           | + | + | + | + | ? | - | + | + | + |
| Lesin 2016         | + | ? | + | + | ? | + | + | + | + |
| Liu 2012           | + | + | + | + | ? | + | + | + | + |
| Lunn 2013          | + | + | + | + | + | + | + | + | + |
| Mamie 2004         | + | + | - | + | + | + | + | + | + |
| Mei 2010           | + | + | + | + | ? | + | + | + | + |
| Murray 2016        | + | + | + | + | ? | + | + | + | + |
| Nishimura 2017     | + | + | + | + | ? | - | + | + | + |
| Orbach-Zinger 2016 | + | + | + | + | + | + | + | + | + |
| Persson 2017       | + | + | + | + | ? | + | + | + | + |
| Petrovic 2014      | + | + | - | + | ? | + | + | + | + |
| Radinovic 2014     | + | + | + | + | ? | + | + | + | + |
| Rakel 2012         | + | + | + | + | ? | - | + | + | + |
| Rehberg 2017       | + | + | + | + | + | + | + | + | + |
| Robleda 2014       | + | ? | ? | + | ? | - | + | + | + |
| Sananslip 2016     | + | + | + | + | ? | + | + | + | + |
| Sommer 2010        | + | + | + | + | + | + | + | + | + |
| Storesund 2016     | + | + | + | + | ? | + | + | + | + |
| Tighe 2014         | + | + | + | + | ? | - | + | + | + |
| Zhao 2014          | + | + | + | + | ? | - | + | + | + |

Figure 2. Assessment of study quality. 1: adequate description of population, 2: non-biased selection, 3: adequate predictor measurement, 4: adequate outcome measurement, 5: blinded outcome assessment (to predictor), 6: adequate statistical adjustment, 7: precision of results, 8: reference standard, and 9: low loss to follow up. Green: low-risk of bias, yellow: unclear-risk of bias, red: high-risk of bias.

215x279mm (300 x 300 DPI)



Figure 3. Summary forest plot for significant preoperative predictors of poor postoperative pain control. Odds ratios are shown with 95 percent confidence intervals. The number of studies included in the meta-analysis for each predictor is indicated.

275x205mm (300 x 300 DPI)

**Table S1. Quality indicators for studies of prognosis.**<sup>35</sup>

| <b>Quality Indicators</b>                 | <b>Description</b>                                                                                                                                                                |
|-------------------------------------------|-----------------------------------------------------------------------------------------------------------------------------------------------------------------------------------|
| <b>Adequate description of population</b> | Study described inclusion criteria for selecting patients, and when enrolled patients described demographics (at least age and sex).                                              |
| <b>Non-biased selection</b>               | Study either reported enrolling (or attempting to enroll) a consecutive series of patients meeting the inclusion criteria, or a random sample.                                    |
| <b>Low loss to follow-up</b>              | Postoperative pain measurements were available for at least 80% of patients for whom exposure data were collected.                                                                |
| <b>Adequate predictor measurement</b>     | Study described reproducible and appropriate methods for measuring relevant predictors.                                                                                           |
| <b>Adequate outcome measurement</b>       | Study utilized one of the following validated pain scales: VAS, VRS, and NRS.                                                                                                     |
| <b>Blinded outcome assessments</b>        | Study reported that outcomes were assessed by persons without knowledge of prognostic factors or that the pain outcome was determined by personnel not aware of study objectives. |
| <b>Adequate statistical adjustment</b>    | Study performed statistical adjustment or controlled for at least 3 potential confounders using acceptable statistical methods.                                                   |
| <b>Precision of results</b>               | Confidence intervals reported for the main outcomes of the study.                                                                                                                 |
| <b>Reference standard</b>                 | The study defined what was considered poor or good postoperative pain control.                                                                                                    |

VAS- visual analogue scale, VRS- verbal rating scale, NRS- numeric rating scale

### Female Sex

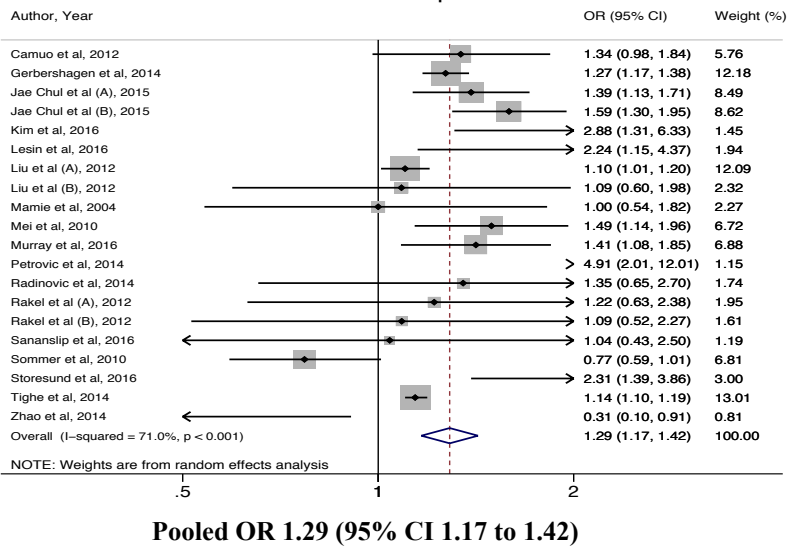

b)

### Younger Age

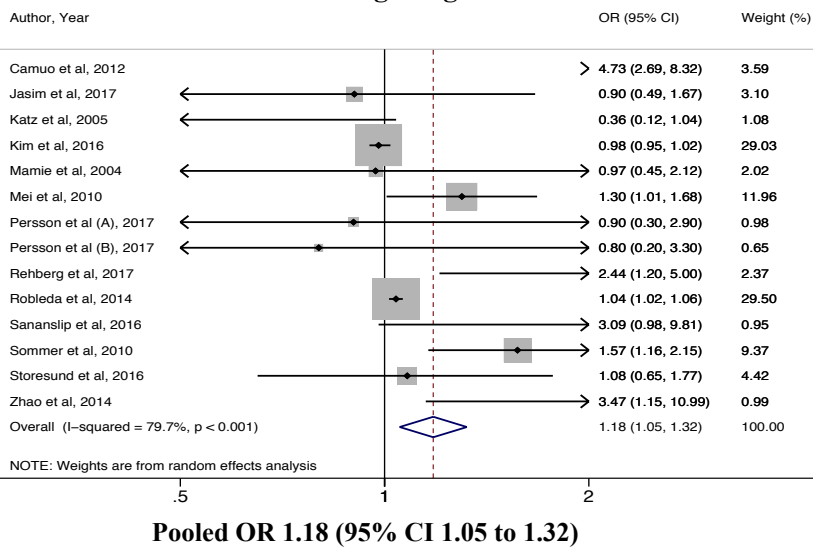

c)

### Smoking

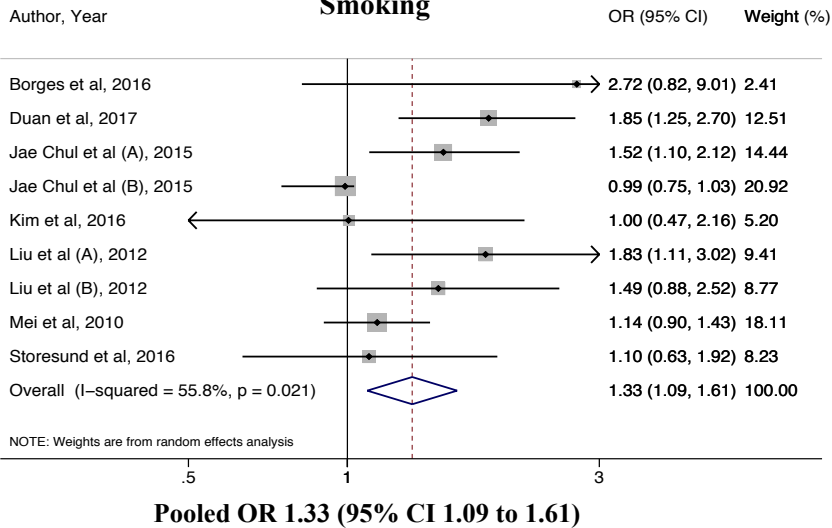

For peer review only - <http://bmjopen.bmj.com/site/about/guidelines.xhtml>

Figure S1. Forest Plot of Preoperative Predictors of Postoperative Pain. a) female sex b) younger age, and c) smoking history.

a)

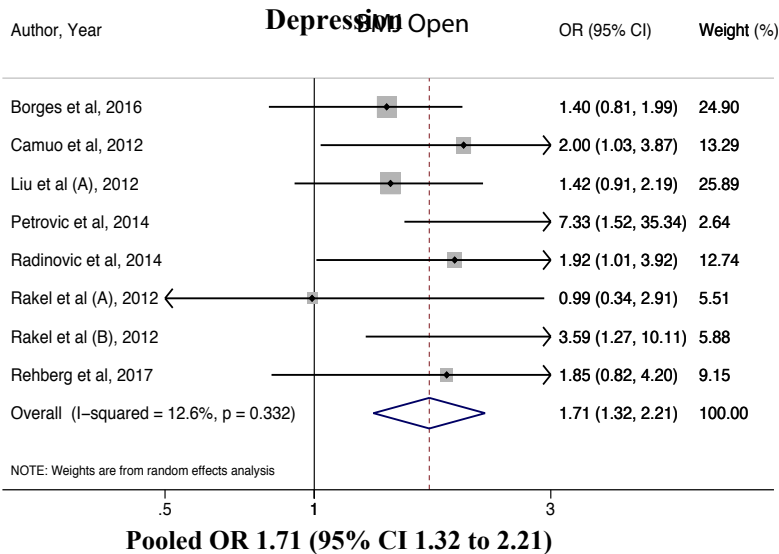

b)

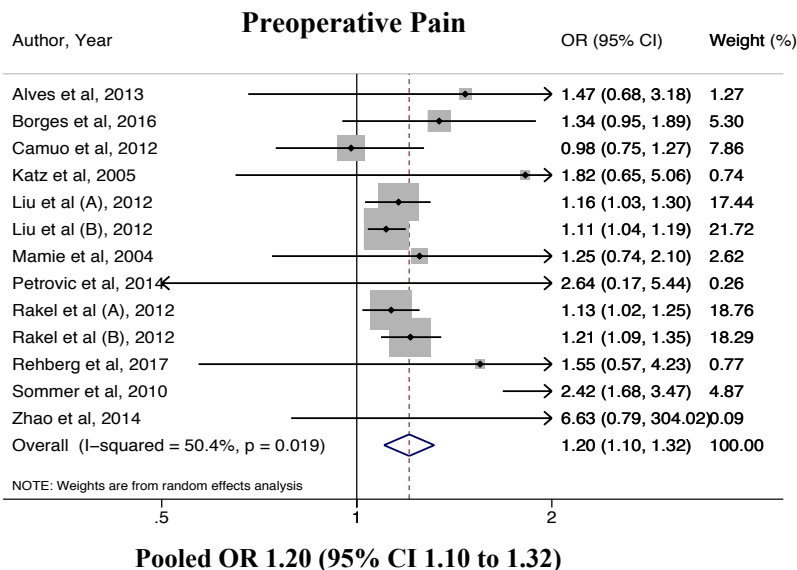

c)

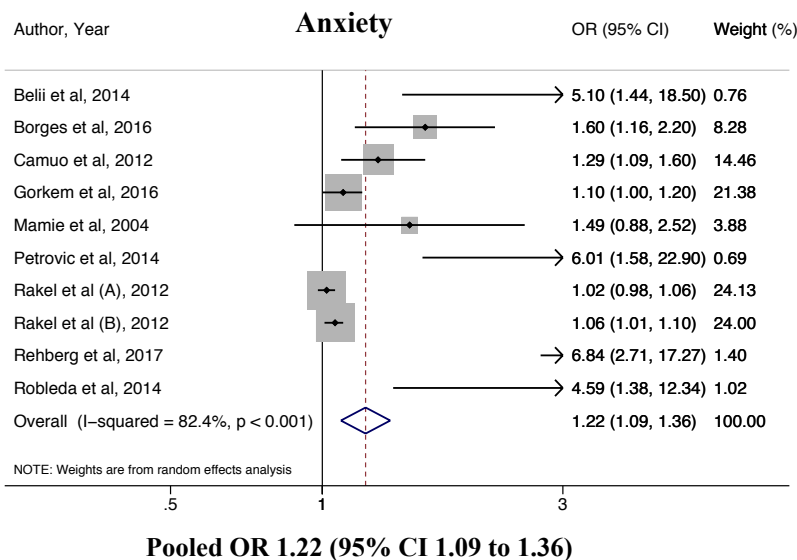

For peer review only - <http://bmjopen.bmj.com/site/about/guidelines.xhtml>

**Figure S2. Forest Plot of Significant Preoperative Predictors of Postoperative Pain.** a) history of depression symptoms, b) presence of preoperative pain, and c) history of anxiety symptoms.

a)

**Preoperative Analgesia**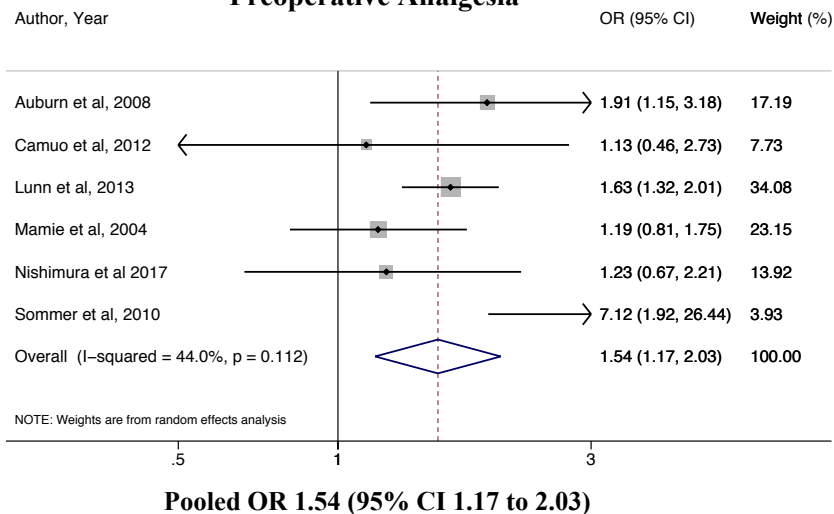

b)

**Body Mass Index**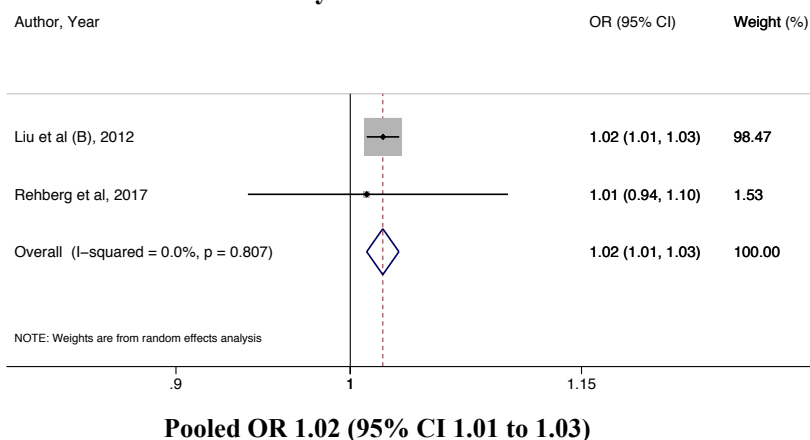

c)

**Sleep Difficulty**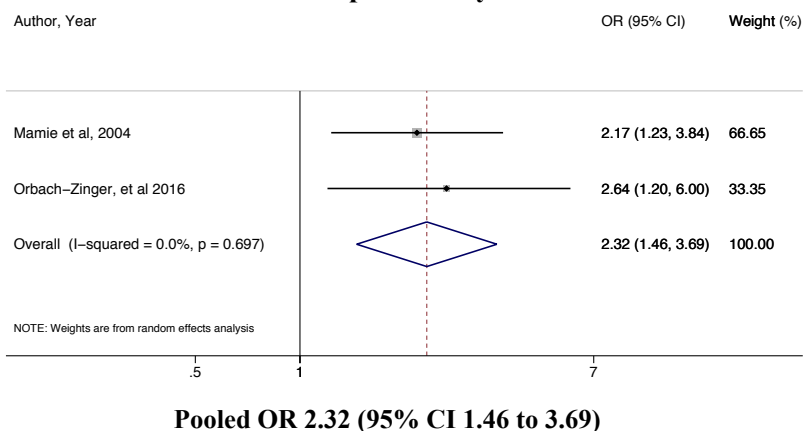

**Figure S3. Forest Plot of Significant Preoperative Predictors of Postoperative Pain.**  
 a) preoperative analgesia, b) body mass index (continuous), and c) history of sleeping difficulty.



a)

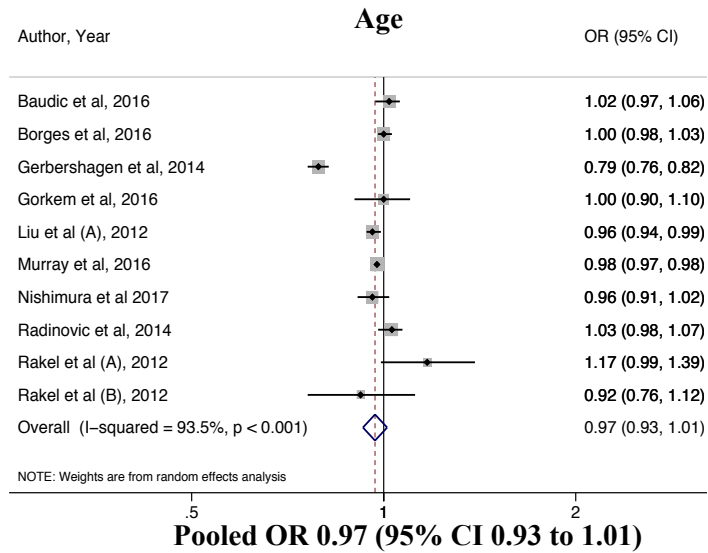

b)

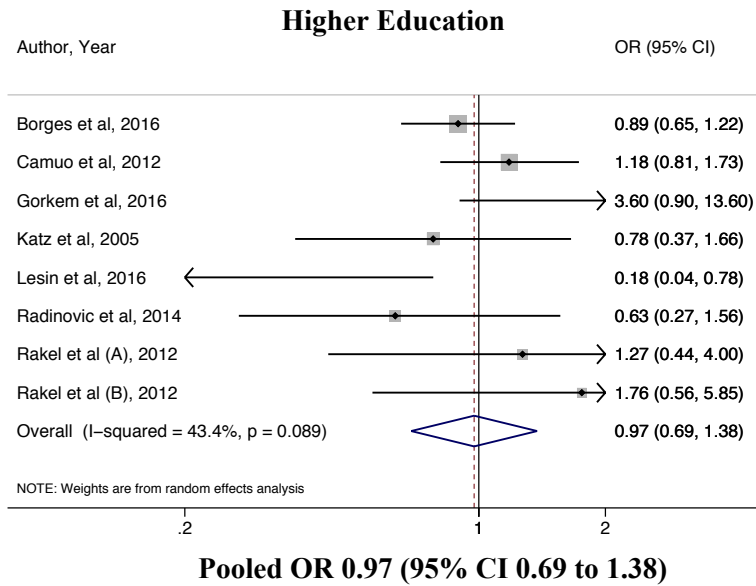

c)

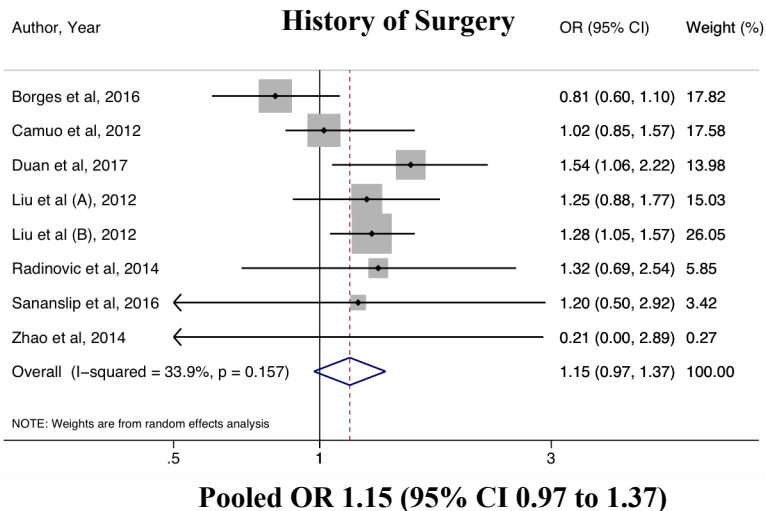

**Figure S4. Forest Plot of Non-Significant Preoperative Predictors of Postoperative Pain.** a) age (continuous), b) higher education, and c) history of surgery.

## Alcohol Use

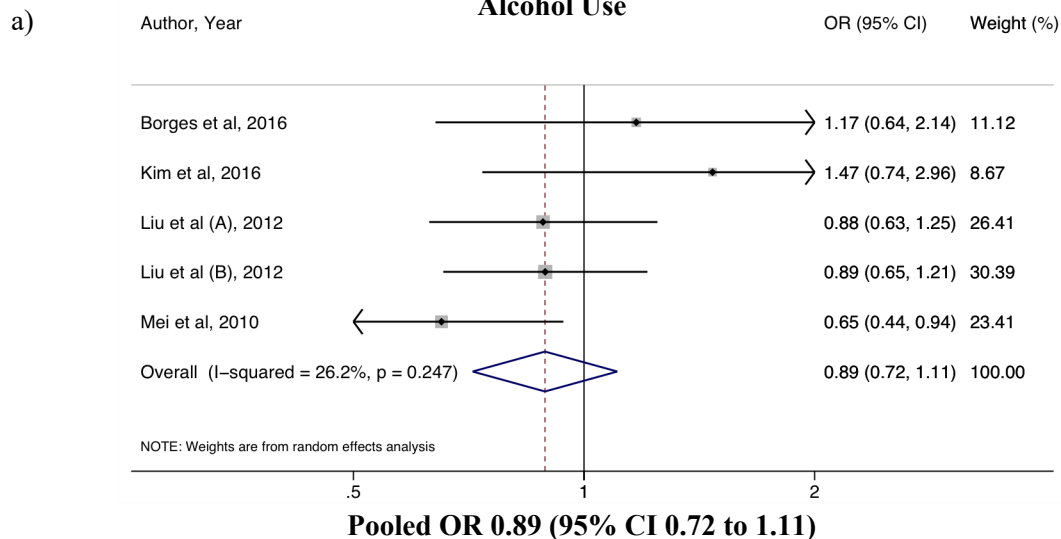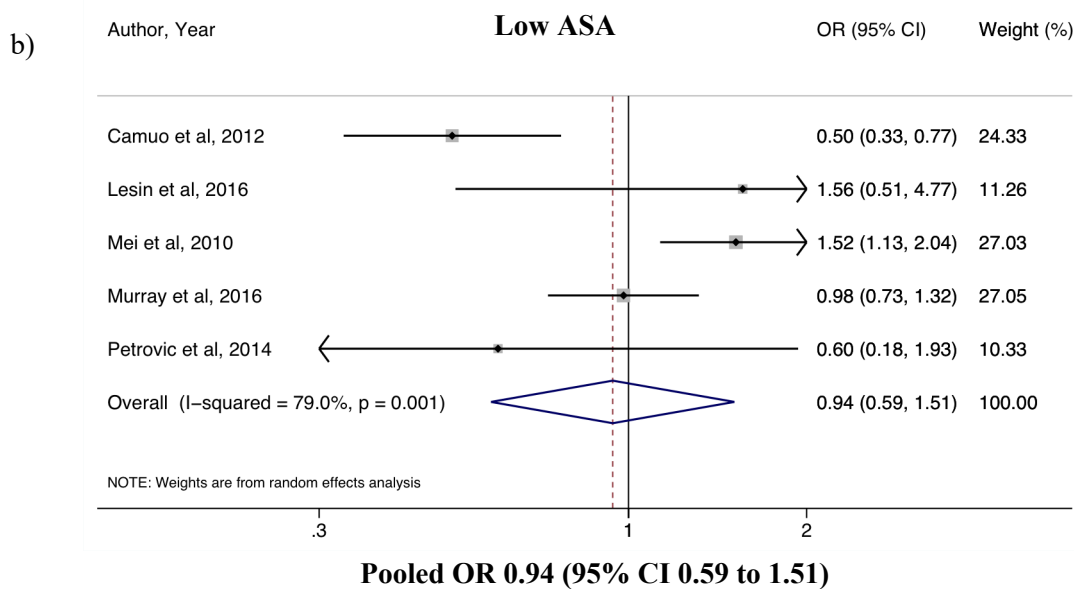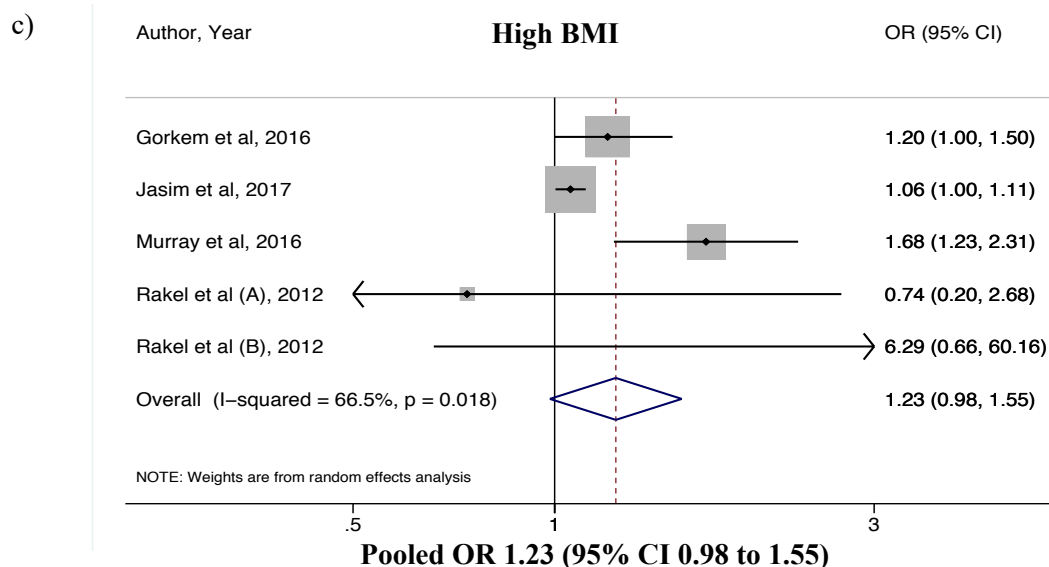

Figure S5. Forest Plot of Non-Significant Preoperative Predictors of Postoperative Pain. a) alcohol use, b) low ASA, and c) BMI (dichotomous).

a)

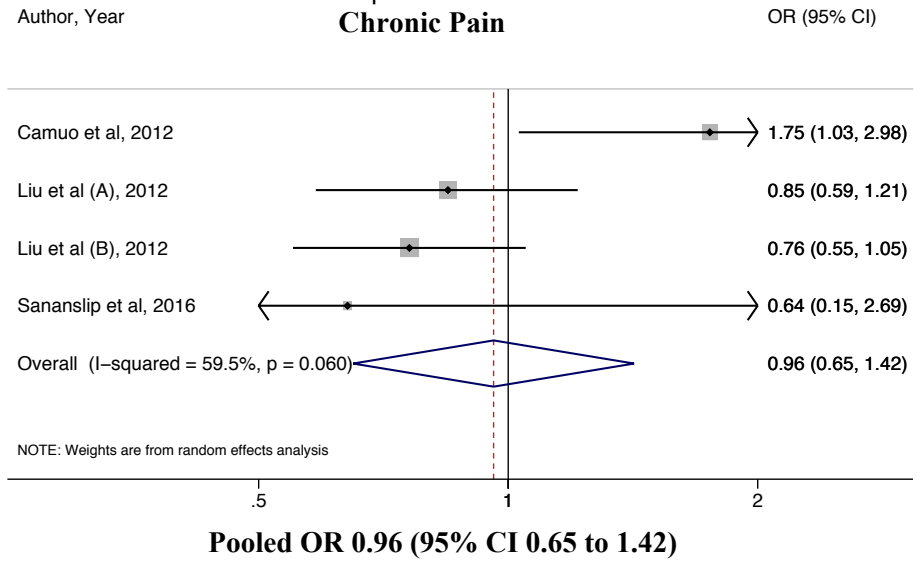

b)

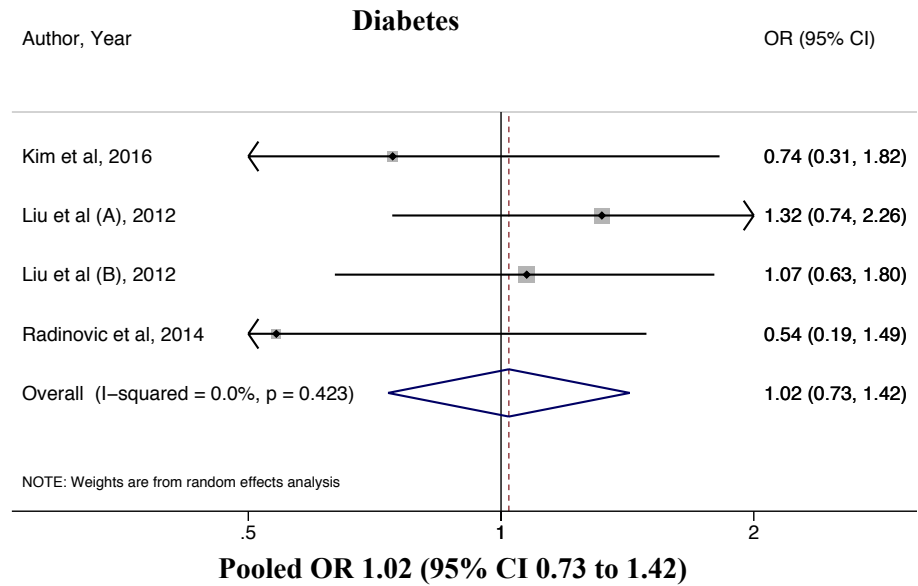

c)

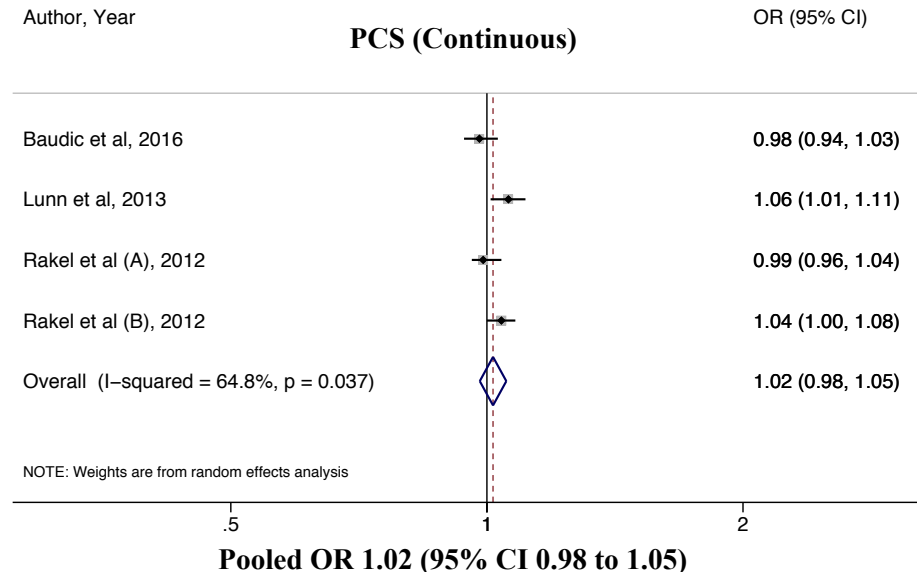

For peer review only - <http://bmjopen.bmj.com/site/about/guidelines.xhtml>  
**Figure S6. Forest Plot of Non-Significant Preoperative Predictors of Postoperative Pain.** a) chronic pain, b) diabetes, and c) pain catastrophizing scale (continuous).

BMJ Open  
Marital Status

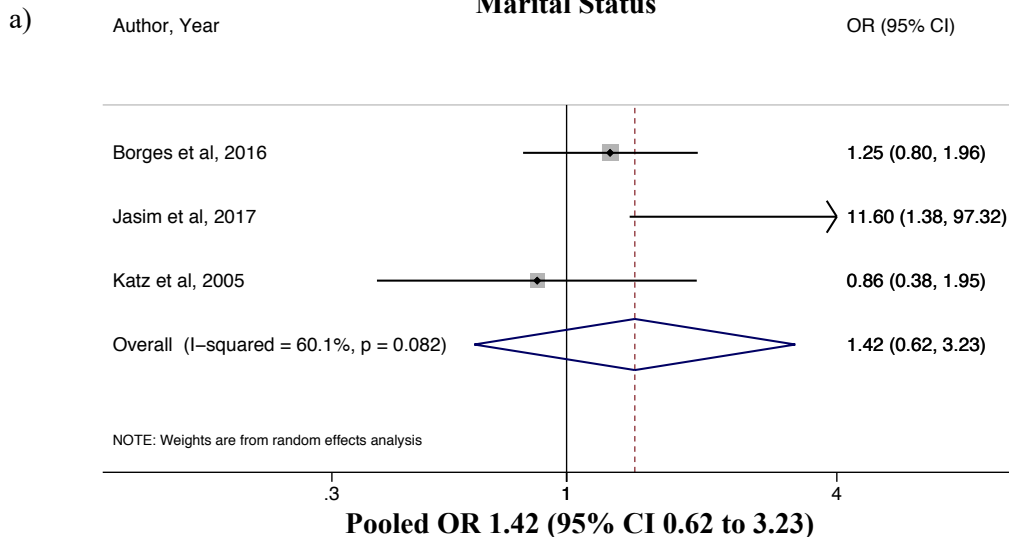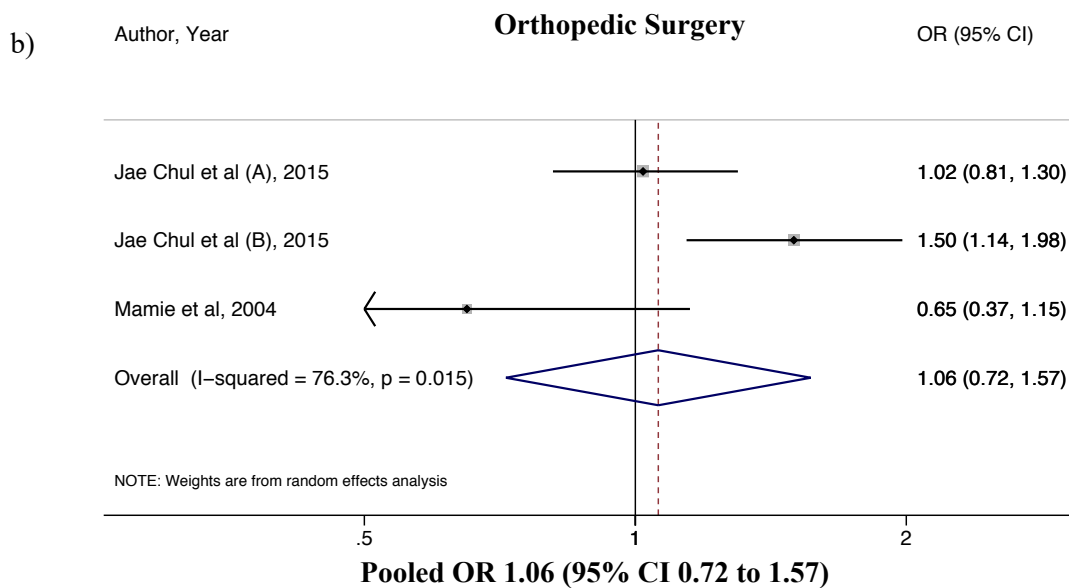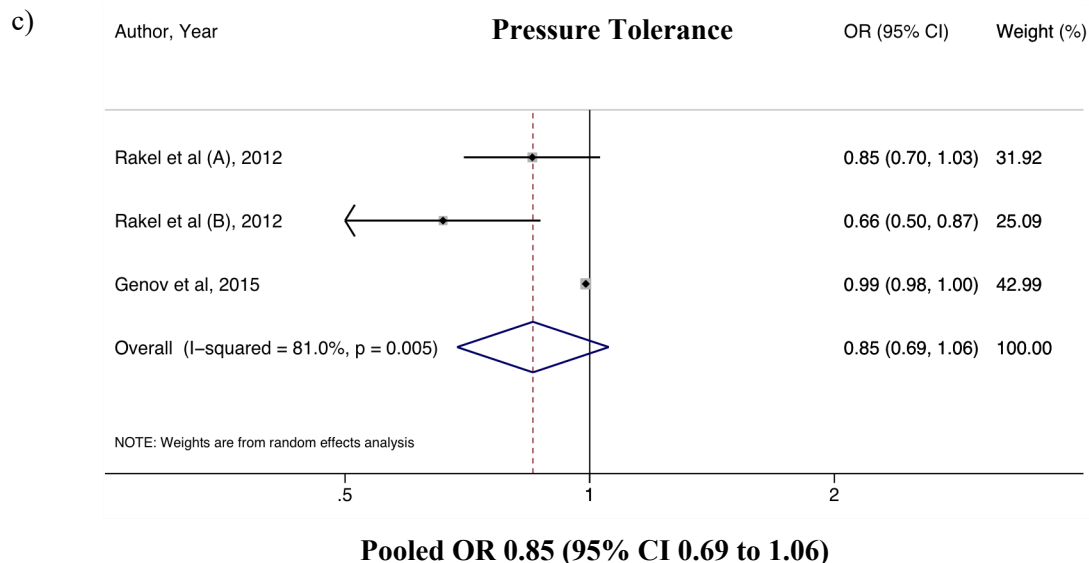

Figure S7. Forest Plot of Non-Significant Preoperative Predictors of Postoperative Pain. a) marital status, b) orthopedic surgery, and c) preoperative pressure tolerance.

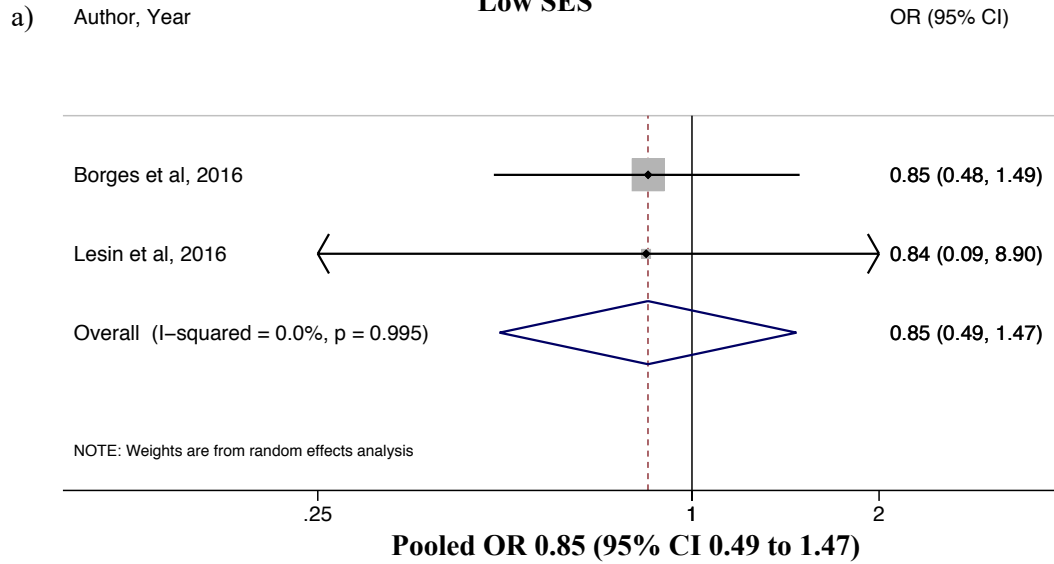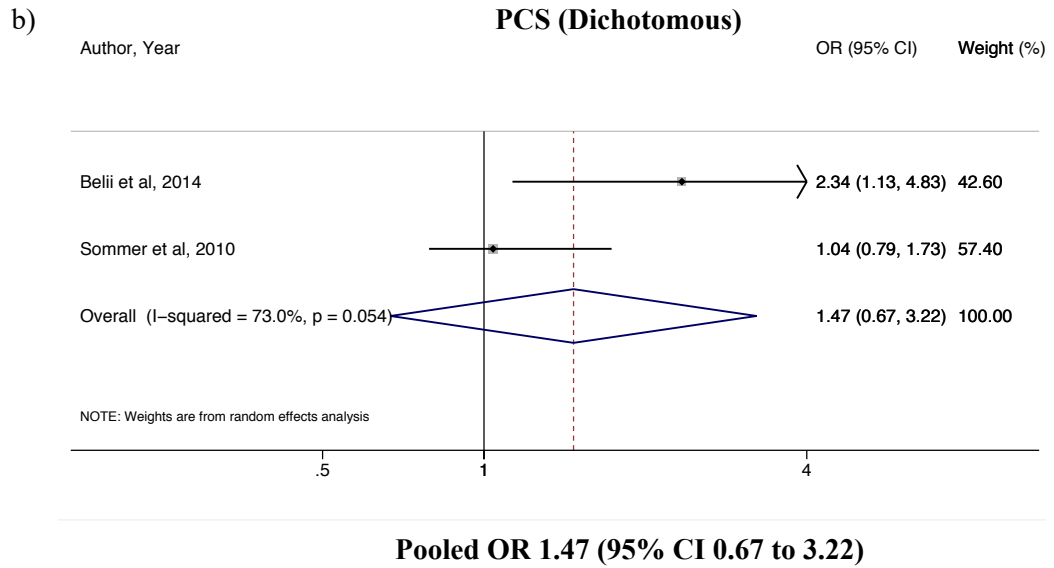

**Figure S8. Forest Plot of Non-Significant Preoperative Predictors of Postoperative Pain. a)** low socioeconomic status and **b)** pain catastrophizing scale (dichotomous).

**Appendix S1. Database Search Strategy.** Themes were combined with Boolean operator “and” and within-theme were combined with Boolean operator “or”.

| <b>MEDLINE</b>          |                                                                                                                                                                                                                                                                                                                                                                                                                                                         |
|-------------------------|---------------------------------------------------------------------------------------------------------------------------------------------------------------------------------------------------------------------------------------------------------------------------------------------------------------------------------------------------------------------------------------------------------------------------------------------------------|
| <b>Pain</b>             | <ol style="list-style-type: none"> <li>1. Pain, Postoperative/</li> <li>2. pain adj2 postoperati*.tw, kw</li> <li>3. pain adj2 post-operati*.tw, kw</li> <li>4. pain adj2 post operati*.tw, kw</li> <li>5. pain adj1 operati*.tw, kw</li> <li>6. post adj procedur* adj pain.tw, kw</li> <li>7. surg* adj1 pain.tw,kw</li> </ol>                                                                                                                        |
| <b>Pain Measurement</b> | <ol style="list-style-type: none"> <li>1. Pain Measurement/</li> <li>2. Pain adj measurement*.tw,kw</li> <li>3. Numeric adj rating adj scale.tw,kw</li> <li>4. NRS.tw,kw</li> <li>5. Visual adj analogue adj scale.tw,kw</li> <li>6. VAS.tw,kw</li> <li>7. Verbal adj rating adj scale.tw,kw</li> <li>8. VRS.tw,kw</li> </ol>                                                                                                                           |
| <b>Surgery</b>          | <ol style="list-style-type: none"> <li>1. EXP surgical procedures, operative/</li> <li>2. surger*.tw,kw</li> <li>3. operative*.tw,kw</li> <li>4. Surgical.tw,kw</li> <li>5. Operation*.tw,kw</li> </ol>                                                                                                                                                                                                                                                 |
| <b>Predictors</b>       | <ol style="list-style-type: none"> <li>1. predictor*.tw,kw</li> <li>2. Protective factors/ or risk assessment/ or risk factors/</li> <li>3. Risk adj factor*.tw,kw</li> <li>4. risk adj assessment*.tw,kw</li> <li>5. protective adj factor*.tw,kw</li> <li>6. Prevalence/</li> <li>7. Prevalence.tw,kw</li> <li>8. Incidence/</li> <li>9. Incidence.tw,kw</li> <li>10. Prognosis/</li> <li>11. Prognos*.tw,kw</li> <li>12. correlati*.tw,kw</li> </ol> |
| <b>EMBASE</b>           |                                                                                                                                                                                                                                                                                                                                                                                                                                                         |
| <b>Pain</b>             | <ol style="list-style-type: none"> <li>1. Pain, Postoperative/</li> <li>2. Pain adj2 postoperati*.tw,kw</li> <li>3. Pain adj2 post-operati*.tw,kw</li> <li>4. Pain adj2 post operati*.tw,kw</li> </ol>                                                                                                                                                                                                                                                  |

|    |                         |                                                  |
|----|-------------------------|--------------------------------------------------|
| 1  |                         |                                                  |
| 2  |                         |                                                  |
| 3  |                         |                                                  |
| 4  |                         | 5. Pain adj1 operati*.tw,kw                      |
| 5  |                         | 6. Post adj procedur* adj pain.tw,kw             |
| 6  |                         | 7. Surg* adj1 pain.tw,kw                         |
| 7  |                         |                                                  |
| 8  | <b>Pain Measurement</b> | 1. Pain adj measurement*.tw,kw                   |
| 9  |                         | 2. Numeric adj rating adj scale.tw,kw            |
| 10 |                         | 3. NRS.tw,kw                                     |
| 11 |                         | 4. Visual adj analogue adj scale.tw,kw           |
| 12 |                         | 5. VAS.tw,kw                                     |
| 13 |                         | 6. Verbal adj rating adj scale.tw,kw             |
| 14 |                         | 7. VRS.tw,kw                                     |
| 15 |                         | 8. Exp pain assessment/ or exp pain measurement/ |
| 16 |                         |                                                  |
| 17 |                         |                                                  |
| 18 | <b>Surgery</b>          | 1. Exp surgery/                                  |
| 19 |                         | 2. Surger*.tw,kw                                 |
| 20 |                         | 3. Operative*.tw,kw                              |
| 21 |                         | 4. Operation*.tw,kw                              |
| 22 |                         |                                                  |
| 23 |                         |                                                  |
| 24 | <b>Predictors</b>       | 1. Predictor*.tw,kw                              |
| 25 |                         | 2. Risk adj factor*.tw,kw                        |
| 26 |                         | 3. Prevalence/                                   |
| 27 |                         | 4. Prevalence.tw,kw                              |
| 28 |                         | 5. Incidence/                                    |
| 29 |                         | 6. Incidence.tw,kw                               |
| 30 |                         | 7. Prognosis/                                    |
| 31 |                         | 8. Prognos*.tw,kw                                |
| 32 |                         | 9. Correlati*.tw,kw                              |
| 33 |                         | 10. "Prediction and forecasting"/                |
| 34 |                         | 11. risk assessment/                             |
| 35 |                         | 12. risk factor/                                 |
| 36 |                         | 13. protective adj factor*.tw,kw                 |
| 37 |                         | 14. risk adj assessment.tw,kw                    |
| 38 |                         |                                                  |
| 39 |                         |                                                  |
| 40 |                         |                                                  |
| 41 |                         |                                                  |
| 42 | <b>PsychInfo</b>        |                                                  |
| 43 | <b>Pain</b>             | 1. Pain adj2 postoperati*.tw                     |
| 44 |                         | 2. Pain adj2 post-operati*.tw                    |
| 45 |                         | 3. Pain adj2 post operati*.tw                    |
| 46 |                         | 4. Pain adj1 operati*.tw                         |
| 47 |                         | 5. Post adj procedur* adj pain.tw                |
| 48 |                         | 6. Surg* adj1 pain.tw                            |
| 49 |                         | 7. Exp Pain                                      |
| 50 |                         |                                                  |
| 51 |                         |                                                  |
| 52 | <b>Pain Measurement</b> | 1. Pain Measurement/                             |
| 53 |                         | 2. Pain adj measurement*.tw                      |
| 54 |                         | 3. Numeric adj rating adj scale.tw               |
| 55 |                         |                                                  |
| 56 |                         |                                                  |
| 57 |                         |                                                  |
| 58 |                         |                                                  |
| 59 |                         |                                                  |
| 60 |                         |                                                  |

|    |                         |                                                    |
|----|-------------------------|----------------------------------------------------|
| 1  |                         |                                                    |
| 2  |                         |                                                    |
| 3  |                         |                                                    |
| 4  |                         | 4. NRS.tw                                          |
| 5  |                         | 5. Visual adj analogue adj scale.tw                |
| 6  |                         | 6. VAS.tw                                          |
| 7  |                         | 7. Verbal adj rating adj scale.tw                  |
| 8  |                         | 8. VRS.tw                                          |
| 9  |                         |                                                    |
| 10 |                         |                                                    |
| 11 | <b>Surgery</b>          | 1. surger*.tw                                      |
| 12 |                         | 2. operative*.tw                                   |
| 13 |                         | 3. Surgical.tw                                     |
| 14 |                         | 4. Operation*.tw                                   |
| 15 |                         | 5. Exp surgery/                                    |
| 16 |                         |                                                    |
| 17 |                         |                                                    |
| 18 |                         |                                                    |
| 19 | <b>Predictors</b>       | 1. predictor*.tw                                   |
| 20 |                         | 2. Protective factors/ or risk assessment/ or risk |
| 21 |                         | factors/                                           |
| 22 |                         | 3. Risk adj factor*.tw                             |
| 23 |                         | 4. risk adj assessment*.tw                         |
| 24 |                         | 5. protective adj factor*.tw                       |
| 25 |                         | 6. Prevalence.tw                                   |
| 26 |                         | 7. Incidence.tw                                    |
| 27 |                         | 8. Prognosis/                                      |
| 28 |                         | 9. Prognos*.tw                                     |
| 29 |                         | 10. correlati*.tw                                  |
| 30 |                         |                                                    |
| 31 |                         |                                                    |
| 32 |                         |                                                    |
| 33 |                         |                                                    |
| 34 | <b>CINAHL</b>           |                                                    |
| 35 | <b>Pain</b>             | 1. MH “postoperative pain”                         |
| 36 |                         | 2. Postoperative pain                              |
| 37 |                         | 3. Pain AND (surgery or surgical or operative or   |
| 38 |                         | operative)”                                        |
| 39 |                         |                                                    |
| 40 | <b>Pain Measurement</b> | 1. MH “pain measurement”                           |
| 41 |                         | 2. Pain measurement                                |
| 42 |                         | 3. Pain assessment or pain scale or pain tool      |
| 43 |                         | 4. Nrs or numeric rating scale                     |
| 44 |                         | 5. Vas or visual analogue scale OR visual analog   |
| 45 |                         | scale                                              |
| 46 |                         | 6. Vrs or verbral rating scale                     |
| 47 |                         |                                                    |
| 48 |                         |                                                    |
| 49 |                         |                                                    |
| 50 |                         |                                                    |
| 51 | <b>Surgery</b>          | 1. MH “surgery, operative”                         |
| 52 |                         | 2. Surgery or operation or surgical procedure      |
| 53 |                         |                                                    |
| 54 |                         |                                                    |
| 55 |                         |                                                    |
| 56 | <b>Predictors</b>       | 1. MH “independent variable”                       |
| 57 |                         |                                                    |
| 58 |                         |                                                    |
| 59 |                         |                                                    |
| 60 |                         |                                                    |



2. Predictors
3. MH “risk factors”
4. MH “risk assessment”
5. Risk factors
6. MH “prevalence”
7. Prevalence
8. Incidence
9. MH “incidence”
10. MH “prognosis”
11. Prognosis

For peer review only

## MOOSE Checklist for Meta-analyses of Observational Studies

| Item No                                     | Recommendation                                                                                                                                                                                                                                                               | Reported on Page No         |
|---------------------------------------------|------------------------------------------------------------------------------------------------------------------------------------------------------------------------------------------------------------------------------------------------------------------------------|-----------------------------|
| Reporting of background should include      |                                                                                                                                                                                                                                                                              |                             |
| 1                                           | Problem definition                                                                                                                                                                                                                                                           | 4                           |
| 2                                           | Hypothesis statement                                                                                                                                                                                                                                                         | 4                           |
| 3                                           | Description of study outcome(s)                                                                                                                                                                                                                                              | 6                           |
| 4                                           | Type of exposure or intervention used                                                                                                                                                                                                                                        | 6, Table 2                  |
| 5                                           | Type of study designs used                                                                                                                                                                                                                                                   | 6                           |
| 6                                           | Study population                                                                                                                                                                                                                                                             | 6, 7                        |
| Reporting of search strategy should include |                                                                                                                                                                                                                                                                              |                             |
| 7                                           | Qualifications of searchers (eg, librarians and investigators)                                                                                                                                                                                                               | 5                           |
| 8                                           | Search strategy, including time period included in the synthesis and key words                                                                                                                                                                                               | 5, 6 and Appendix S1        |
| 9                                           | Effort to include all available studies, including contact with authors                                                                                                                                                                                                      | 5-7                         |
| 10                                          | Databases and registries searched                                                                                                                                                                                                                                            | 5                           |
| 11                                          | Search software used, name and version, including special features used (eg, explosion)                                                                                                                                                                                      | 5 and Appendix S1           |
| 12                                          | Use of hand searching (eg, reference lists of obtained articles)                                                                                                                                                                                                             | 5, 6                        |
| 13                                          | List of citations located and those excluded, including justification                                                                                                                                                                                                        | Figure 1                    |
| 14                                          | Method of addressing articles published in languages other than English                                                                                                                                                                                                      | 7                           |
| 15                                          | Method of handling abstracts and unpublished studies                                                                                                                                                                                                                         | 6                           |
| 16                                          | Description of any contact with authors                                                                                                                                                                                                                                      | 7                           |
| Reporting of methods should include         |                                                                                                                                                                                                                                                                              |                             |
| 17                                          | Description of relevance or appropriateness of studies assembled for assessing the hypothesis to be tested                                                                                                                                                                   | 6                           |
| 18                                          | Rationale for the selection and coding of data (eg, sound clinical principles or convenience)                                                                                                                                                                                | 6-9                         |
| 19                                          | Documentation of how data were classified and coded (eg, multiple raters, blinding and interrater reliability)                                                                                                                                                               | 6-9                         |
| 20                                          | Assessment of confounding (eg, comparability of cases and controls in studies where appropriate)                                                                                                                                                                             | 8, Figure 2                 |
| 21                                          | Assessment of study quality, including blinding of quality assessors, stratification or regression on possible predictors of study results                                                                                                                                   | 7, Table S1, Figure 2       |
| 22                                          | Assessment of heterogeneity                                                                                                                                                                                                                                                  | 8, 9                        |
| 23                                          | Description of statistical methods (eg, complete description of fixed or random effects models, justification of whether the chosen models account for predictors of study results, dose-response models, or cumulative meta-analysis) in sufficient detail to be replicated | 8, 9                        |
| 24                                          | Provision of appropriate tables and graphics                                                                                                                                                                                                                                 | Tables 1, 2. Figures 1, 2,3 |
| Reporting of results should include         |                                                                                                                                                                                                                                                                              |                             |
| 25                                          | Graphic summarizing individual study estimates and overall estimate                                                                                                                                                                                                          | Figure 3, Figure S1 to S8   |

|    |                                                              |         |
|----|--------------------------------------------------------------|---------|
| 26 | Table giving descriptive information for each study included | Table 1 |
| 27 | Results of sensitivity testing (eg, subgroup analysis)       | 12      |
| 28 | Indication of statistical uncertainty of findings            | Table 2 |

| Item No                                 | Recommendation                                                                                                            | Reported on Page No |
|-----------------------------------------|---------------------------------------------------------------------------------------------------------------------------|---------------------|
| Reporting of discussion should include  |                                                                                                                           |                     |
| 29                                      | Quantitative assessment of bias (eg, publication bias)                                                                    | 8, 9                |
| 30                                      | Justification for exclusion (eg, exclusion of non-English language citations)                                             | Figure 1            |
| 31                                      | Assessment of quality of included studies                                                                                 | Figure 2            |
| Reporting of conclusions should include |                                                                                                                           |                     |
| 32                                      | Consideration of alternative explanations for observed results                                                            | 12-16               |
| 33                                      | Generalization of the conclusions (ie, appropriate for the data presented and within the domain of the literature review) | 15-16               |
| 34                                      | Guidelines for future research                                                                                            | 16-17               |
| 35                                      | Disclosure of funding source                                                                                              | 1                   |

From: Stroup DF, Berlin JA, Morton SC, et al, for the Meta-analysis Of Observational Studies in Epidemiology (MOOSE) Group. Meta-analysis of Observational Studies in Epidemiology. A Proposal for Reporting. *JAMA*. 2000;283(15):2008-2012. doi: 10.1001/jama.283.15.2008.

Transcribed from the original paper within the NEUROSURGERY® Editorial Office, Atlanta, GA, United States. August 2012.

# BMJ Open

## Preoperative predictors of poor acute postoperative pain control: a systematic review and meta-analysis

|                                 |                                                                                                                                                                                                                                                                                                                                                                                                                                                                                          |
|---------------------------------|------------------------------------------------------------------------------------------------------------------------------------------------------------------------------------------------------------------------------------------------------------------------------------------------------------------------------------------------------------------------------------------------------------------------------------------------------------------------------------------|
| Journal:                        | <i>BMJ Open</i>                                                                                                                                                                                                                                                                                                                                                                                                                                                                          |
| Manuscript ID                   | bmjopen-2018-025091.R2                                                                                                                                                                                                                                                                                                                                                                                                                                                                   |
| Article Type:                   | Research                                                                                                                                                                                                                                                                                                                                                                                                                                                                                 |
| Date Submitted by the Author:   | 08-Feb-2019                                                                                                                                                                                                                                                                                                                                                                                                                                                                              |
| Complete List of Authors:       | Yang, Michael M.H.; University of Calgary, Clinical Neurosciences<br>Hartley, Rebecca; University of Calgary, Surgery<br>Leung, Alexander; University of Calgary, Department of Community Health Sciences<br>Ronksley, Paul; University of Calgary, Community Health Sciences<br>Jette, Nathalie; Icahn School of Medicine at Mount Sinai, Neurology<br>Casha, Steven; University of Calgary, Clinical Neurosciences<br>Riva-Cambrin, Jay; University of Calgary, Clinical Neurosciences |
| <b>Primary Subject Heading</b>: | Surgery                                                                                                                                                                                                                                                                                                                                                                                                                                                                                  |
| Secondary Subject Heading:      | Epidemiology                                                                                                                                                                                                                                                                                                                                                                                                                                                                             |
| Keywords:                       | postoperative pain, preoperative predictors, SURGERY, pain, pain scale, meta-analysis                                                                                                                                                                                                                                                                                                                                                                                                    |
|                                 |                                                                                                                                                                                                                                                                                                                                                                                                                                                                                          |

SCHOLARONE™  
Manuscripts

## Preoperative predictors of poor acute postoperative pain control: a systematic review and meta-analysis

Michael M.H. Yang MD M.Biotech<sup>1,2</sup>, Rebecca L. Hartley MD<sup>2,3</sup>, Alexander A. Leung MD MPH<sup>2,4</sup>, Paul E. Ronksley PhD<sup>2</sup>, Nathalie Jetté MD MSc<sup>5</sup>, Steven Casha MD PhD<sup>1</sup>, Jay Riva-Cambrin MD MSc<sup>1,2</sup>

### Affiliations:

<sup>1</sup>Department of Clinical Neurosciences, Section of Neurosurgery, University of Calgary, Canada

<sup>2</sup>Department of Community Health Sciences, University of Calgary, Canada

<sup>3</sup>Section of Plastic Surgery, Department of Surgery, University of Calgary, Canada

<sup>4</sup>Division of Endocrinology and Metabolism, Department of Medicine, University of Calgary, Canada

<sup>5</sup>Icahn School of Medicine at Mount Sinai, Department of Neurology, USA

### Author of Correspondence:

Dr. Michael M.H. Yang

Department of Clinical Neurosciences

University of Calgary

12<sup>th</sup> Floor, 29 Street NW

Calgary, AB, T2N 2T9, Canada

Email: [minhan.yang@ucalgary.ca](mailto:minhan.yang@ucalgary.ca)

Telephone: 1-403-667-3678

Fax: 1-403-283-5559

**PROSPERO ID:** CRD42017080682

**Funding Statement:** This research received no specific grant from any funding agency in the public, commercial or not-for-profit sectors

**Conflict of Interest:** The authors declare no competing interests.

**Abbreviated Title (running head):** Predictors of poor acute postoperative pain control in adults

**Data Sharing Statement:** Extracted data and statistical code will be made available by contacting the corresponding author.

**Patient Consent:** Patient consent is not required when conducting a systematic review.

**Ethics Approval:** This study did not require ethical approval as the data used have been published previously, and hence are already in the public domain.

**Keywords:** postoperative pain, preoperative predictors, surgery, pain, pain scales, meta-analysis

**Word Count:** 3,334

## Abstract

### Objectives

Inadequate postoperative pain control is common and is associated with poor clinical outcomes. This study aimed to identify preoperative predictors of poor postoperative pain control in adults undergoing inpatient surgery.

### Design

Systematic review and meta-analysis.

### Data Sources

MEDLINE, EMBASE, CINAHL, and PsychInfo were searched through October 2017.

### Eligibility Criteria

Studies in any language were included if they evaluated postoperative pain using a validated instrument in adults ( $\geq 18$  years) and reported a measure of association between poor postoperative pain control (defined by study authors) and at least one preoperative predictor during the hospital stay.

### Data extraction and synthesis

Two reviewers screened articles, extracted data, and assessed study quality. Measures of association for each preoperative predictor were pooled using random effects models.

### Results

Thirty-three studies representing 53,362 patients were included in this review. Significant preoperative predictors of poor postoperative pain control included younger age (OR 1.18 [95%CI 1.05-1.32], number of studies, n=14), female sex (OR 1.29 [95%CI 1.17-1.43], n=20), smoking (OR 1.33 [95%CI 1.09-1.61], n=9), history of depressive symptoms (OR 1.71 [95%CI 1.32-2.22], n=8), history of anxiety symptoms (OR 1.22 [95%CI 1.09-1.36], n=10), sleep difficulties (OR 2.32 [95%CI 1.46-3.69], n=2), higher BMI (OR 1.02 [95%CI 1.01-1.03], n=2), presence of preoperative pain (OR 1.21 [95%CI 1.10-1.32], n=13), and use of preoperative analgesia (OR 1.54 [95%CI 1.18-2.03], n=6). Pain catastrophizing, ASA status, chronic pain, marital status, socioeconomic status, education, surgical history, preoperative pressure pain tolerance, and orthopedic surgery (vs. abdominal surgery) were not associated with an increased odds of poor pain control. Study quality was generally high, although appropriate blinding of predictor during outcome ascertainment was often limited.

### Conclusions

Nine predictors of poor postoperative pain control were identified. These should be recognized as potentially important factors when developing discipline specific clinical-care pathways to improve pain outcomes and to guide future surgical pain research.

1  
2  
3 Article Summary  
4  
5

6 *Strengths and limitations of this study*  
7

- 8
- 9 • This systematic review provides a comprehensive meta-analysis on a large number of preoperative patient prognostic factors for poor acute postoperative pain control.
  - 10 • The inclusion of multiple surgical specialties and articles representing diverse geographical locations increases the generalizability of the findings.
  - 11 • There were a variety of definitions for poor postoperative pain control, timing of pain assessment, and thresholds used to categorize continuous preoperative variables making the clinical and statistical interpretation of the meta-analysis more challenging.
  - 12 • For certain preoperative variables, the number of studies included were few and may be underpowered to detect significant differences.
- 13  
14  
15  
16  
17  
18  
19  
20  
21  
22  
23  
24  
25  
26  
27  
28  
29  
30  
31  
32  
33  
34  
35  
36  
37  
38  
39  
40  
41  
42  
43  
44  
45  
46  
47  
48  
49  
50  
51  
52  
53  
54  
55  
56  
57  
58  
59  
60

## Introduction

Since 1999, when the Joint Commission on Accreditation of Healthcare Organizations set the standard for the appropriate assessment and management of pain, pain has been recognized as the fifth vital sign.<sup>1</sup> With the aging and growing population, the number of surgeries has increased to an excess of 280 million procedures performed globally every year.<sup>2-8</sup> Numerous studies suggest poor acute postoperative pain control is common and often inadequately treated.<sup>9-12</sup> Importantly, ineffective postoperative pain control is associated with poor outcomes including increased length-of-stay, sleep disturbance, prolonged time to first mobilization, and increased opioid use.<sup>11 13 14</sup> Further, poor postoperative pain control is associated with delirium in the elderly, development of chronic pain syndromes, cardiopulmonary, and thromboembolic complications.<sup>10 11 15-17</sup> Postoperative pain may be improved by understanding the preoperative predictors of poor pain control by allowing use of anticipatory and individualized treatments.<sup>18 19</sup>

A previous systematic review reported a limited number of predictors of poor postoperative pain control including age, anxiety, preoperative pain, and surgery type.<sup>20</sup> However, quantitative analysis was not possible due to variability in the reporting of measures of associations and study design heterogeneity of the included studies. Since its publication nearly a decade ago, many additional studies have been published with improved methodological rigour,<sup>21-24</sup> thus providing a new opportunity to provide an updated summary of the literature and to generate pooled estimates of risk. The goal of this study was to systematically identify significant preoperative predictors of poorly controlled acute postoperative pain and to quantify the associated risks. We focused on acute postoperative pain experienced during the surgical hospitalization. This meta-



1  
2  
3 analysis is important to help identify predictors that could inform future surgical pain research  
4 and aid in the development of discipline-specific clinical care pathways (e.g., enhanced recovery  
5 after surgery programs) to improve pain outcomes.  
6  
7  
8  
9  
10

## 11 **Methods**

12  
13  
14 This review was reported according to the Meta-analyses Of Observational Studies in  
15 Epidemiology (MOOSE) standards for systematic reviews and meta-analyses of observational  
16 studies. This review was also conducted based on an *a priori* protocol registered with  
17 PROSPERO International Prospective Register of Systematic Review (ID: CRD42017080682,  
18 [http://www.crd.york.ac.uk/PROSPERO/display\\_record.php?ID=CRD42017080682](http://www.crd.york.ac.uk/PROSPERO/display_record.php?ID=CRD42017080682)).<sup>25-27</sup>  
19  
20  
21  
22  
23  
24  
25  
26  
27

### 28 *Patient and Public Involvement*

29 Patients and the public were not involved in the development of this systematic review.  
30  
31  
32  
33  
34

### 35 *Search Strategy*

36  
37 A search strategy was developed using the *Peer Review of Electronic Search Strategy* (PRESS)<sup>28</sup>  
38 in consultation with two research librarians. We focused on the keywords “pain”, “pain  
39 measurement”, “surgery”, and “predictors”. We searched MEDLINE (1950-October 13<sup>th</sup>, 2017),  
40 EMBASE (1980-October 13<sup>th</sup>, 2017), CINAHL (1937-October 13<sup>th</sup>, 2017) and PsychInfo (1967-  
41 October 13<sup>th</sup>, 2017) (Appendix S1, online supplemental information). To maximize sensitivity  
42 for studies of prognosis, search filters were not used, and no restrictions were placed on date or  
43 language of publication.<sup>29 30</sup> Our search was repeated using Google and Google Scholar for the  
44 grey literature. Bibliographies of included studies were searched by hand for other relevant  
45  
46  
47  
48  
49  
50  
51  
52  
53  
54  
55  
56  
57  
58  
59  
60

1  
2  
3 articles. A local pain specialist was also consulted to identify any potential ongoing studies or  
4  
5 unpublished data.  
6  
7  
8  
9

### 10 *Study Inclusion*

11  
12 We included observational studies (cohort and cross-sectional) reporting on adults ( $\geq 18$  years  
13  
14 old) undergoing surgery and admitted for at least 24 hours following their procedure (e.g.,  
15  
16 excluded ambulatory surgery/procedures, dental procedures, carpal tunnel release, etc.), and  
17  
18 studies that assessed for the association between preoperative patient-level predictors and poor  
19  
20 postoperative pain control (as defined by individual study authors). Only inpatient procedures  
21  
22 were included to minimize the heterogeneity of the surgical population as well as providing more  
23  
24 reliable pain outcomes. Perioperative predictors were not assessed because our primary aim was  
25  
26 to inform clinicians evaluating patients in the preoperative clinical setting where perioperative  
27  
28 risk factors may not be known or modifiable. No interventional studies were included.  
29  
30  
31  
32  
33  
34

35  
36 Studies were required to report an assessment of pain during the inpatient period using a  
37  
38 validated pain scale. Previous studies have demonstrated that the visual analogue scale (VAS),  
39  
40 numeric rating scale (NRS), and verbal rating scales (VRS) for pain are highly correlated with  
41  
42 each other, and thus they were considered comparable in the present study.<sup>31</sup> To facilitate  
43  
44 pooling of data, we only included studies that reported a measure of association, such as an odds  
45  
46 ratio (OR) or relative risk (RR), as well as studies with raw data where an OR could be manually  
47  
48 calculated. Conference abstracts, reviews, protocols, and secondary publications (of studies  
49  
50 already included in our review) were excluded. Two reviewers (M.Y. and R.H.) independently  
51  
52 reviewed titles, abstracts, and full-text articles of the retrieved studies in duplicate. Discrepancies  
53  
54  
55  
56  
57  
58  
59  
60

1  
2  
3 were resolved by consensus. Inter-rater agreement was evaluated using Cohen's  $\kappa$  statistic for the  
4  
5 full-text review stage.  
6  
7  
8  
9

### 10 *Data Extraction*

11  
12 Study information such as author, year and country of publication, sample size, pain scale used,  
13  
14 the definition of poorly controlled postoperative pain, number of predictors adjusted for in a  
15  
16 multivariable regression model (where applicable), and the average age of the sample population  
17  
18 were extracted. Both unadjusted and most adjusted effect estimates were recorded whenever  
19  
20 multiple estimates were presented. For studies that reported their results in distinct strata (e.g.,  
21  
22 young vs. old age, or moderate vs. severe pain), each stratum was treated as an independent  
23  
24 study for the pooled analysis (no patients were analyzed in duplicate).<sup>23 32-34</sup> Non-English studies  
25  
26 were data-extracted with the help of a translator.  
27  
28  
29  
30  
31  
32

### 33 *Study Quality Assessment*

34  
35 We used a component-based approach to assess the quality of included studies.<sup>35</sup> The following  
36  
37 variables were considered to be the most important quality indicators for studies of prognosis  
38  
39 (definition of quality indicators are in Table S1, online supplemental information)<sup>35</sup>: description  
40  
41 of population, non-biased selection, adequate follow-up (e.g., postoperative pain measurements  
42  
43 were recorded for at least 80% of study participants), predictor measurement, outcome  
44  
45 measurement and ascertainment, adjustment for confounding variables (operationalized as  
46  
47 adjusting for at least 3 potential confounders), precision of reported results (e.g., reporting of  
48  
49 confidence intervals), as well as the use of an appropriate reference standard (e.g., definition of  
50  
51 poor postoperative pain control provided).<sup>29 35 36</sup> Data-extraction and assessment of study quality  
52  
53  
54  
55  
56  
57  
58  
59  
60

1  
2  
3 were performed in duplicate; discrepancies were resolved by consensus. If a study presented  
4 unclear data, the corresponding author was emailed with a follow-up email after two weeks if a  
5 response was not received.  
6  
7  
8  
9

### 10 11 12 *Statistical Analysis* 13

14 We used ORs as the common measure of association. RRs were converted to odds ratio using the  
15 formula,  $OR = RR / (1 / [1 / (1 - P_o)] + P_o)$ , where  $P_o$  is the incidence of the outcome of interest in the  
16 non-exposed group.<sup>37</sup> When raw data were presented, ORs were manually calculated. For the  
17 primary analysis, the most adjusted ORs were used to determine the pooled estimates. The  
18 analysis was then repeated using the least adjusted effect estimates. Pooled estimates, expressed  
19 as ORs (with 95% confidence intervals [CI]), were determined for each preoperative predictor  
20 associated with poor postoperative pain control levels using the DerSimonian and Laird random  
21 effects model and visualized using forest plots. A random effects model was chosen due to the  
22 variability in surgical specialties, definitions of poor postoperative pain, and the reported timing  
23 of postoperative pain assessment in the included studies. Meta-analysis was performed using the  
24 'metan' command within STATA v.15 (StataCorp, College Station, Texas). Level of  
25 significance was set at  $\alpha=0.05$ .  
26  
27  
28  
29  
30  
31  
32  
33  
34  
35  
36  
37  
38  
39  
40  
41  
42  
43

44 Between-study heterogeneity was examined and quantified using the Cochran Q test and  $I^2$   
45 statistic.<sup>38</sup> Stratified analysis and meta-regression were performed to explore for potential  
46 sources of heterogeneity based on an *a priori* list of factors related to study quality and clinical  
47 prognosis. Stratification was conducted on the following variables: degree of statistical  
48 adjustment (e.g., operationalized as adjustment for  $<3$  vs.  $\geq 3$  variables), definition of poor  
49  
50  
51  
52  
53  
54  
55  
56  
57  
58  
59  
60

1  
2  
3 postoperative pain control (moderate vs. severe pain; moderate pain: 3-6, severe pain: >6 on an  
4  
5 11-point scale; studies not using a numeric scale (e.g., morphine requirements as the definition  
6  
7 for poor pain control) were considered moderate pain), surgical discipline, blinding of predictors  
8  
9 when assessing pain scores, and location of pain assessment (e.g., post-anesthetic care unit vs.  
10  
11 ward). Preoperative factors only reported in a single study could not be pooled and therefore  
12  
13 were not included in the final analyses. We did not assess for publication bias because  
14  
15 conventional tools used to examine for publication bias, such as funnel plots, are intended to  
16  
17 detect small study effects. Small study effects are challenging to interpret for meta-analyses of  
18  
19 observational studies, such as ours, where multiple sources of heterogeneity may be present, such  
20  
21 as those arising from true clinical differences (e.g., different surgical disciplines/procedures) or  
22  
23 bias inherent to individual studies (e.g., residual confounding, lack of blinding).<sup>30</sup>  
24  
25  
26  
27  
28  
29  
30

## 31 **Results**

### 32 33 34 *Literature Search & Study Characteristics*

35  
36 We identified 9,753 articles through electronic database and grey literature search (Figure 1).  
37  
38 Consultation with a pain expert and searching of the grey literature yielded 38 articles. After  
39  
40 initial screening, 291 articles were included for full-text review. Full-text review resulted in the  
41  
42 inclusion of 33 articles for data extraction with excellent inter-rater reliability ( $\kappa= 0.83$  [95%CI  
43  
44 0.71-0.91]). No unpublished studies were identified and included in the final analysis.  
45  
46  
47  
48  
49

50  
51 The 33 included studies represented 53,362 patients with publication dates ranging between 2002  
52  
53 and 2017 (study characteristics of included studies are in Table 1).<sup>19 21-24 32-34 39-63</sup> Twenty-six  
54  
55 studies were prospective cohort studies (79%) and 7 were retrospective cohort studies (21%).  
56  
57  
58  
59  
60

1  
2  
3 Most studies were conducted in Europe (17/33 studies, 51.5%), followed by Asia (8/33 studies,  
4 24.2%). Studies involving a mixture of specialties (11/33 studies, 33.3%) and general surgery  
5 (10/33 studies, 30.3%) had the largest representation. A variety of thresholds were used to define  
6 poor pain control on a standard 11-point scale (0-10) across studies; the most common definition  
7 of significant postoperative pain was  $\geq 4$  out of 10 (13/33 studies, 39.4%) followed by  $>$  or  $\geq 5$   
8 out of 10 (7/33 studies, 21.1%). NRS, VAS and VRS scale for pain was used in 57.6%, 42.4%,  
9 and 3.0% of studies respectively. The most common time-interval when postoperative pain was  
10 measured was between 24-48 hours (19/33 studies, 57.6%). The mean number of predictors  
11 (including preoperative and perioperative variables) explored per study was 10.0 (SD: 5.73,  
12 range 1-19) (Table 1). There was a lack of dedicated prognostic studies evaluating predictors of  
13 postoperative pain control in most surgical sub-specialities including neurosurgery, spine  
14 surgery, otolaryngology and plastic surgery.  
15  
16  
17  
18  
19  
20  
21  
22  
23  
24  
25  
26  
27  
28  
29  
30  
31  
32

### 33 *Assessment of Study Quality*

34  
35 The overall methodological quality of the included studies was generally high except for the use  
36 of a blinded outcome assessment (Figure 2). In 25 studies (76%), there was either no blinding or  
37 no reporting on whether there was blinding of predictors during outcome ascertainment. The lack  
38 of blinding of predictors during outcome ascertainment in the majority of studies could lead to  
39 increased risk of misclassification bias. Twelve studies (36%) did not adjust for at least 3  
40 potential confounders, 5 studies (15%) did not provide definitions of preoperative predictors, and  
41 4 studies (12%) did not define how their sample was selected.  
42  
43  
44  
45  
46  
47  
48  
49  
50  
51  
52  
53

### 54 *Preoperative Predictors of Poor Postoperative Pain Control*

1  
2  
3 Of the 23 variables examined, 9 statistically significant preoperative predictors of poor  
4 postoperative pain control were found: younger age (OR 1.18 [95% CI 1.05-1.32]), female sex  
5 (OR 1.29 [95% CI 1.17-1.43]), smoking (OR 1.33 [95% CI 1.09-1.61]), history of depressive  
6 symptoms (OR 1.71 [95% CI 1.32-2.22]), history of anxiety symptoms (OR 1.22 [95% CI 1.09-  
7 1.36]), sleep difficulties (OR 2.32 [95% CI 1.46-3.69]), higher BMI as a continuous variable (OR  
8 1.02 [95% CI 1.01-1.03]), presence of preoperative pain (OR 1.21 [95% CI 1.10-1.32]), and use  
9 of preoperative analgesia (OR 1.54 [95% CI 1.18-2.03]). Pooled ORs and definition for each  
10 preoperative variable are shown in Table 2. Summary forest plots of significant preoperative  
11 predictors of poor postoperative pain control are presented in Figure 3. Significant heterogeneity  
12 was detected in 5 of these predictors (female sex, younger age, the presence of preoperative pain,  
13 history of anxiety symptoms, and smoking) with  $I^2$  values ranging from 50.4% to 82.4% (Table  
14 2). Detailed forest plots for each significant preoperative predictor are shown in online  
15 supplemental Figures S1 to S3.

#### 35 *Non-Significant Preoperative Predictors of Poor Postoperative Pain Control*

36  
37 Fourteen predictors were not significant in the final analysis: pain catastrophizing scale  
38 (exaggerated negative perception to painful stimuli) as a dichotomous variable, marital status,  
39 high BMI as a dichotomous variable, any previous surgical history, orthopedic surgery compared  
40 to abdominal surgery, diabetes, pain catastrophizing as a continuous variable, higher education,  
41 age as a continuous variable, chronic pain, American Society of Anesthesiologists (ASA)  
42 Physical Status, alcohol use, preoperative pressure pain tolerance and low socioeconomic status  
43 (Table 2). Detailed forest plots for each non-significant preoperative predictor are shown in  
44 online supplemental Figures S4 to S8.

1  
2  
3  
4  
5 Preoperative variables reported in only one study (and hence were excluded from the meta-  
6 analyses) included: patient weight, surgeon's anticipated pain level, self-assessment of good  
7 health, generalized self-efficacy scale, sedentary lifestyle, employment status, short portable  
8 mental status questionnaire, preoperative delirium (confusion assessment method), constipation,  
9  
10 rectal volume, body image scale, history of cancer, hypertension, heart disease, preoperative  
11 anemia, anticonvulsant medication, home sedatives, electrical pain threshold, heat pain  
12 threshold, von Frey pain intensity, blood type, preoperative 24 hour urinary cortisol level,  
13 thoracic surgery, spine surgery, head & neck surgery, and total knee replacement.  
14  
15  
16  
17  
18  
19  
20  
21  
22  
23  
24  
25

### 26 *Stratified Meta-Analysis and Meta-Regression*

27  
28 Stratified meta-analyses (according to the level of statistical adjustment, the definition of poor  
29 pain, surgical discipline, blinding of predictors, and location of pain assessment) showed no  
30 differences in the pooled estimates and therefore did not explain the significant level of  
31 heterogeneity observed between studies. These results were corroborated by meta-regression.  
32  
33 Repeating the analysis using least adjusted versus most adjusted models also found similar  
34 pooled results for each preoperative predictor.  
35  
36  
37  
38  
39  
40  
41  
42  
43  
44

## 45 **Discussion**

46  
47  
48 In this systematic review and meta-analysis of 33 studies, we identified 9 preoperative predictors  
49 that were negatively associated with pain control after surgery: young age, female sex, smoking,  
50 history of depressive symptoms, history of anxiety symptoms, sleep difficulties, higher BMI,  
51 presence of preoperative pain, and use of preoperative analgesia. The most well-studied  
52  
53  
54  
55  
56  
57  
58  
59  
60



1  
2  
3 predictors were female sex (number of studies, n=20), young age (n=14), and the presence of  
4  
5 preoperative pain (n=13). The strongest negative prognostic factors were a history of sleeping  
6  
7 difficulties (number of studies, n=2) and depression (n=8), which were independently associated  
8  
9 with approximately 2-fold higher odds of poor postoperative pain control. Our findings are  
10  
11 consistent with and extend the results of the previous systematic review by Ip and colleagues.<sup>20</sup>  
12  
13 In addition to the predictors previously described, we identified 6 additional preoperative  
14  
15 predictors of poor postoperative pain control.<sup>20</sup>  
16  
17  
18  
19  
20  
21

22 Previous reports have been inconsistent in their conclusions regarding the association of female  
23  
24 sex with worse pain prognosis after surgery.<sup>20 60</sup> Some have observed higher pain scores in  
25  
26 females,<sup>47 50 53 54</sup> whereas others failed to find such a difference between sexes.<sup>34 57 59</sup> In this  
27  
28 meta-analysis, we found females had an approximately 30% increased odds of poor  
29  
30 postoperative pain control compared to males. Sex differences may potentially relate to complex  
31  
32 psychosocial and biological factors, such as an increased willingness of women to communicate  
33  
34 pain,<sup>64</sup> and subjective differences in pain perception and experience.<sup>20</sup> Indeed, females are  
35  
36 reported to require 11% greater doses of morphine on average compared to males in order to  
37  
38 achieve adequate postoperative analgesia.<sup>65</sup> Furthermore, younger age (as a dichotomous  
39  
40 variable) was found to be a significant predictor for poor postoperative pain control. When  
41  
42 examined as a continuous variable, the point estimate also suggested older age was protective  
43  
44 (e.g., for every decade of age, there was an associated 30% decrease in the odds for poor  
45  
46 postoperative pain control), though this association was not statistically significant. Notably,  
47  
48 studies examining age as a continuous variable may not have been able to detect a statistically  
49  
50 significant difference because the majority of these studies were restricted to older patients and  
51  
52  
53  
54  
55  
56  
57  
58  
59  
60

1  
2  
3 few examined younger subjects. Further, it is possible that the association between age and  
4  
5 postoperative pain is non-linear. While sex and age are non-modifiable risk factors, this  
6  
7 knowledge can still be used to anticipate pain trajectories and individualize analgesia  
8  
9 requirements in the perioperative period.  
10  
11  
12  
13

14 Novel risk factors identified in this study included smoking, history of depressive symptoms,  
15  
16 preoperative analgesic use, and higher BMI. Smoking has been previously reported to be a  
17  
18 negative prognostic factor for pain control and a predictor of increased use of opioid analgesia.<sup>66</sup>  
19  
20

21 <sup>67</sup> Our finding implicating this modifiable risk factor in the setting of surgical pain supports the  
22  
23 undertaking of future interventional studies evaluating the impact of preoperative smoking  
24  
25 cessation programs on postoperative pain control. The presence of depression (whether self-  
26  
27 reported or measured with a validated scale) was also associated with worse pain outcomes.  
28  
29 Importantly, a wide spectrum of depression was represented by the included studies, and even  
30  
31 included subjects with relatively mild depressive symptoms.<sup>44</sup> Thus even mild or moderate levels  
32  
33 of depressive symptoms may be associated with an increased odds of poor postoperative pain  
34  
35 control. The use of preoperative analgesia, especially opioid therapy has been linked to poor  
36  
37 postoperative pain control in numerous studies.<sup>23 68</sup> This may be due to greater preoperative  
38  
39 severity of pain, opioid-induced hyperalgesia, and central or peripheral sensitization to pre-  
40  
41 existing nociception.<sup>23 69</sup> Further research on the impact of modifying these risk factors in the  
42  
43 pre- and peri-operative period is needed to determine its effect on improving postoperative pain  
44  
45 outcomes.  
46  
47  
48  
49  
50  
51  
52  
53

#### 54 *Strengths & Limitations*

55  
56  
57  
58  
59  
60

1  
2  
3  
4  
5 The strengths of our study are the comprehensive search of the literature, inclusion of 33 articles  
6 (resulting in data on more than 53,000 patients), and the ability to generate pooled estimates for a  
7  
8 large number of prognostic factors. The inclusion and stratification by multiple surgical  
9  
10 specialties and the diversity of geographic locations increase the generalizability of the findings.  
11  
12 However, the findings from the present report should be interpreted in the context of the study  
13  
14 design. First, the primary studies included in our systematic review and meta-analysis were  
15  
16 observational in nature. As is inherent to all observational designs, residual confounding cannot  
17  
18 be excluded. This was particularly the case for unadjusted estimates. Nonetheless, we found that  
19  
20 the most adjusted models yielded broadly similar results to the least adjusted estimates. Further,  
21  
22 we performed meta-analyses on studies that had appreciable heterogeneity as it pertains to  
23  
24 definition of poor postoperative pain control (which was variably defined by individual study  
25  
26 authors), surgical procedure/specialty, timing and instrument used for pain assessment, and  
27  
28 threshold used to categorize continuous preoperative predictors between studies (e.g., young vs.  
29  
30 old). Outcome heterogeneity may have been a potential source of bias if, for example, a  
31  
32 particular predictor was associated with an increased risk of postoperative pain with one  
33  
34 instrument (or cut-off) and a decreased risk of pain using a different instrument (or cut-off). In  
35  
36 such cases, a pooled analysis might fail to detect either finding. Although we do not believe this  
37  
38 issue biased our findings, future studies should attempt to standardize definitions (common data  
39  
40 elements) to facilitate comparisons between studies. For significant predictors that were  
41  
42 evaluated by a limited number of studies (e.g., sleep difficulty), future studies should be  
43  
44 performed to ensure reproducibility. Finally, there was significant statistical heterogeneity  
45  
46 between studies, which could not be explained by stratified analysis or meta-regression based on  
47  
48  
49  
50  
51  
52  
53  
54  
55  
56  
57  
58  
59  
60

1  
2  
3 a variety of clinical and study design factors (and the results should be interpreted with caution  
4  
5 for surgical discipline as there were limited number of studies in each group). This heterogeneity  
6  
7 was likely a product of important clinical differences as the included studies differed widely in  
8  
9 surgery type and case-mix. Additional research may further define the influence of specific types  
10  
11 of surgery on pain control.  
12  
13

## 14 15 16 17 **Conclusion** 18

19  
20  
21 In conclusion, we identified and described 9 predictors of poor postoperative pain control in  
22  
23 patients undergoing surgery requiring hospital admission. Early identification of predictors in  
24  
25 patients at risk of poor postoperative pain control may allow for more individualized  
26  
27 interventions, better pain management, and decrease reliance on pain medications (particularly  
28  
29 opioids). Increased awareness of these predictors can also aid in the development of personalized  
30  
31 discipline-specific clinical care pathways (e.g., multimodal analgesic strategies and enhanced  
32  
33 recovery after surgery programs) to reduce length of stay and perioperative medical  
34  
35 complications by improving postoperative pain outcomes. In addition, there is a lack of  
36  
37 dedicated research in certain specialties such as spine surgery, plastic surgery, and  
38  
39 otolaryngology that should warrant further investigation. Although acute postoperative pain is  
40  
41 common, no standard criteria exist to classify outcomes. Future work is needed to develop  
42  
43 consensus criteria for acute postoperative pain outcomes, ideally as an international, multicenter  
44  
45 collaborative using the Delphi method. Future prospective (observational or interventional)  
46  
47 studies on acute postoperative pain control should consider addressing the predictors found in  
48  
49 this review.  
50  
51  
52  
53  
54  
55  
56  
57  
58  
59  
60

## Acknowledgement

We thank Dr. Diane Lorenzetti and Lorraine Toews for their assistance in developing the electronic database search strategy, Dr. Kelly Shinkaruk for her assistance in our literature search, and Dr. Alina Makoyeva for translating the non-English article.

For peer review only

## References

1. Berry PH, Dahl JL. The new JCAHO pain standards: implications for pain management nurses. *Pain Manag Nurs* 2000;1(1):3-12. doi: 10.1053/jpmn.2000.5833 [published Online First: 2001/11/15]
2. Weiser TG, Regenbogen SE, Thompson KD, et al. An estimation of the global volume of surgery: a modelling strategy based on available data. *Lancet* 2008;372(9633):139-44. doi: 10.1016/S0140-6736(08)60878-8 [published Online First: 2008/06/28]
3. Ciol MA, Deyo RA, Howell E, et al. An Assessment of Surgery for Spinal Stenosis: Time Trends, Geographic Variations, Complications, and Reoperations. *Journal of the American Geriatrics Society* 1996;44(3):285-90. doi: 10.1111/j.1532-5415.1996.tb00915.x
4. Etzioni DA, Liu JH, Maggard MA, et al. The aging population and its impact on the surgery workforce. *Annals of surgery* 2003;238(2):170.
5. Total knee and hip replacement surgery projections show meteoric rise by 2030. Orthopaedic procedures set to continue gaining widespread acceptance as means to restore quality-of-life. Annual Meeting of the American Academy of Orthopaedic Surgery; 2006.
6. McCarty CA, Keeffe JE, Taylor HR. The need for cataract surgery: projections based on lens opacity, visual acuity, and personal concern. *British Journal of Ophthalmology* 1999;83(1):62-65.
7. Sosa JA, Wang TS, Yeo HL, et al. The maturation of a specialty: workforce projections for endocrine surgery. *Surgery* 2007;142(6):876-83.
8. Wu JM, Kawasaki A, Hundley AF, et al. Predicting the number of women who will undergo incontinence and prolapse surgery, 2010 to 2050. *American journal of obstetrics and gynecology* 2011;205(3):230. e1-30. e5.
9. Kalkman CJ, Visser K, Moen J, et al. Preoperative prediction of severe postoperative pain. *Pain* 2003;105(3):415-23. [published Online First: 2003/10/07]
10. Radinovic K, Markovic-Denic L, Jovanovic B, et al. Predictors of severe pain in the immediate postoperative period in elderly patients following hip fracture surgery. *Regional Anesthesia and Pain Medicine* 2016;41 (5 Supplement 1):e92. doi: <http://dx.doi.org/10.1097/AAP.0000000000000469>
11. Caumo W, Broenstrup JC, Fialho L, et al. Risk factors for postoperative anxiety in children. *Acta Anaesthesiologica Scandinavica* 2000;44(7):782-9.
12. Sommer M, de Rijke JM, van Kleef M, et al. The prevalence of postoperative pain in a sample of 1490 surgical inpatients. *European journal of anaesthesiology* 2008;25(4):267-74. doi: 10.1017/s0265021507003031 [published Online First: 2007/12/07]
13. Peters CL, Shirley B, Erickson J. The effect of a new multimodal perioperative anesthetic regimen on postoperative pain, side effects, rehabilitation, and length of hospital stay after total joint arthroplasty. *The Journal of arthroplasty* 2006;21(6):132-38.
14. Sriwatanakul K, Weis OF, Alloza JL, et al. Analysis of narcotic analgesic usage in the treatment of postoperative pain. *JAMA* 1983;250(7):926-9. [published Online First: 1983/08/19]

15. Katz J, Jackson M, Kavanagh BP, et al. Acute pain after thoracic surgery predicts long-term post-thoracotomy pain. *Clin J Pain* 1996;12(1):50-5. [published Online First: 1996/03/01]
16. Lynch EP, Lazor MA, Gellis JE, et al. The impact of postoperative pain on the development of postoperative delirium. *Anesth Analg* 1998;86(4):781-5. [published Online First: 1998/04/16]
17. Perttunen K, Tasmuth T, Kalso E. Chronic pain after thoracic surgery: a follow-up study. *Acta Anaesthesiol Scand* 1999;43(5):563-7. [published Online First: 1999/05/26]
18. Zheng H, Schnabel A, Yahiaoui-Doktor M, et al. Age and preoperative pain are major confounders for sex differences in postoperative pain outcome: A prospective database analysis. *PLoS ONE* 2017;12 (6) (no pagination)(e0178659) doi: <http://dx.doi.org/10.1371/journal.pone.0178659>
19. Rehberg B, Mathivon S, Combescure C, et al. Prediction of acute postoperative pain following breast cancer surgery using the pain sensitivity questionnaire a cohort study. *Clinical Journal of Pain* 2017;33(1):57-66. doi: <http://dx.doi.org/10.1097/AJP.0000000000000380>
20. Ip HY, Abrishami A, Peng PW, et al. Predictors of postoperative pain and analgesic consumption: a qualitative systematic review. *Anesthesiology* 2009;111(3):657-77. doi: 10.1097/ALN.0b013e3181aae87a [published Online First: 2009/08/13]
21. Gorkem U, Togrtogrul C, Sahiner Y, et al. Preoperative anxiety may increase postcesarean delivery pain and analgesic consumption. *Minerva Anesthesiol* 2016;82(9):974-80.
22. Katz J, Poleshuck EL, Andrus CH, et al. Risk factors for acute pain and its persistence following breast cancer surgery. *Pain* 2005;119(1-3):16-25. doi: <https://dx.doi.org/10.1016/j.pain.2005.09.008>
23. Liu SS, Buvanendran A, Rathmell JP, et al. Predictors for moderate to severe acute postoperative pain after total hip and knee replacement. *Int Orthop* 2012;36(11):2261-7. doi: <https://dx.doi.org/10.1007/s00264-012-1623-5>
24. Nishimura D, Kosugi S, Onishi Y, et al. Psychological and endocrine factors and pain after mastectomy. *Eur J Pain* 2017;21(7):1144-53. doi: <https://dx.doi.org/10.1002/ejp.1014>
25. Stroup DF, Berlin JA, Morton SC, et al. Meta-analysis of observational studies in epidemiology: a proposal for reporting. Meta-analysis Of Observational Studies in Epidemiology (MOOSE) group. *JAMA* 2000;283(15):2008-12. [published Online First: 2000/05/02]
26. Shamseer L, Moher D, Clarke M, et al. Preferred reporting items for systematic review and meta-analysis protocols (PRISMA-P) 2015: elaboration and explanation. *Bmj* 2015;350:g7647. doi: 10.1136/bmj.g7647 [published Online First: 2015/01/04]
27. Liberati A, Altman DG, Tetzlaff J, et al. The PRISMA statement for reporting systematic reviews and meta-analyses of studies that evaluate health care interventions: explanation and elaboration. *Journal of clinical epidemiology* 2009;62(10):e1-34. doi: 10.1016/j.jclinepi.2009.06.006 [published Online First: 2009/07/28]
28. McGowan J, Sampson M, Salzwedel DM, et al. PRESS Peer Review of Electronic Search Strategies: 2015 Guideline Statement. *Journal of clinical epidemiology* 2016;75:40-6. doi: 10.1016/j.jclinepi.2016.01.021 [published Online First: 2016/03/24]
29. Altman DG. Systematic reviews of evaluations of prognostic variables. *Bmj* 2001;323(7306):224-8. [published Online First: 2001/07/28]

- 1
- 2
- 3
- 4 30. Egger M, Davey-Smith G, Altman D. Systematic reviews in health care: meta-analysis in
- 5 context: John Wiley & Sons 2008.
- 6 31. Katz J, Melzack R. Measurement of pain. *Surg Clin North Am* 1999;79(2):231-52. [published
- 7 Online First: 1999/06/03]
- 8 32. Jae Chul K, Jinae L, So Yeon K, et al. Postoperative Pain and Intravenous Patient-Controlled
- 9 Analgesia-Related Adverse Effects in Young and Elderly Patients: A Retrospective
- 10 Analysis of 10,575 Patients. *Medicine (Baltimore)* 2015;94(45):1-7. doi:
- 11 10.1097/MD.0000000000002008
- 12 33. Persson AKM, Dyrehag LE, Akeson J. Prediction of postoperative pain from electrical pain
- 13 thresholds after laparoscopic cholecystectomy. *Clinical Journal of Pain* 2017;33(2):126-
- 14 31. doi: <http://dx.doi.org/10.1097/AJP.0000000000000394>
- 15 34. Rakel BA, Blodgett NP, Bridget Zimmerman M, et al. Predictors of postoperative movement
- 16 and resting pain following total knee replacement. *Pain* 2012;153(11):2192-203. doi:
- 17 <https://dx.doi.org/10.1016/j.pain.2012.06.021>
- 18 35. Hayden JA, Cote P, Bombardier C. Evaluation of the quality of prognosis studies in
- 19 systematic reviews. *Ann Intern Med* 2006;144(6):427-37. [published Online First:
- 20 2006/03/22]
- 21 36. Laupacis A, Wells G, Richardson WS, et al. Users' guides to the medical literature. V. How
- 22 to use an article about prognosis. Evidence-Based Medicine Working Group. *JAMA*
- 23 1994;272(3):234-7. [published Online First: 1994/07/20]
- 24 37. Zhang J, Kai FY. What's the relative risk?: A method of correcting the odds ratio in cohort
- 25 studies of common outcomes. *Jama* 1998;280(19):1690-91.
- 26 38. Higgins JP, Thompson SG, Deeks JJ, et al. Measuring inconsistency in meta-analyses. *Bmj*
- 27 2003;327(7414):557-60. doi: 10.1136/bmj.327.7414.557 [published Online First:
- 28 2003/09/06]
- 29 39. Alves ML, Vieira JE, Mathias LA, et al. Preoperative coping mechanisms have no predictive
- 30 value for postoperative pain in breast cancer. *Rev Bras Psiquiatr* 2013;35(4):364-8. doi:
- 31 <https://dx.doi.org/10.1590/1516-4446-2012-0934>
- 32 40. Aubrun F, Valade N, Coriat P, et al. Predictive factors of severe postoperative pain in the
- 33 postanesthesia care unit. 2008;106(5):1535-41, table of contents. doi:
- 34 <https://dx.doi.org/10.1213/ane.0b013e318168b2ce>
- 35 41. Baudic S, Jayr C, Albi-Feldzer A, et al. Effect of Alexithymia and Emotional Repression on
- 36 Postsurgical Pain in Women With Breast Cancer: A Prospective Longitudinal 12-Month
- 37 Study. *J Pain* 2016;17(1):90-100. doi: 10.1016/j.jpain.2015.10.001
- 38 42. Belii N, Moghildea V, Sandru S, et al. Anxiety, but not pain catastrophizing, represents a risk
- 39 factor for severe acute postoperative pain: A prospective, observational, cohort study.
- 40 *Jurnalul Roman de Anestezie Terapie Intensiva/Romanian Journal of Anaesthesia and*
- 41 *Intensive Care* 2014;21(1):19-26.
- 42 43. Borges NC, Pereira LV, de Moura LA, et al. Predictors for Moderate to Severe Acute
- 43 Postoperative Pain after Cesarean Section. *Pain Res Manag* 2016;2016:5783817. doi:
- 44 <https://dx.doi.org/10.1155/2016/5783817>
- 45 44. Caumo W, Schmidt AP, Schneider CN, et al. Preoperative predictors of moderate to intense
- 46 acute postoperative pain in patients undergoing abdominal surgery. *Acta*
- 47 *Anaesthesiologica Scandinavica* 2002;46(10):1265-71.
- 48
- 49
- 50
- 51
- 52
- 53
- 54
- 55
- 56
- 57
- 58
- 59
- 60



- 1
- 2
- 3
- 4 45. Duan G, Guo S, Zhang Y, et al. Effects of Epidemiological Factors and Pressure Pain
- 5 Measurements in Predicting Postoperative Pain: A Prospective Survey of 1,002 Chinese
- 6 Patients. *Pain physician* 2017;20(6):E903-E14.
- 7 46. Genov PG, Smirnova OV, Glushchenko NS, et al. Predicting of postoperative pain level and
- 8 morphine consumption by preoperative pressure pain assessment in patients before
- 9 elective surgery. [Russian]. *Anesteziol Reanimatol* 2015;60(1):11-16.
- 10 47. Gerbershagen HJ, Pogatzki-Zahn E, Aduckathil S, et al. Procedure-specific risk factor
- 11 analysis for the development of severe postoperative pain. *Anesthesiology*
- 12 2014;120(5):1237-45. doi: <https://dx.doi.org/10.1097/ALN.000000000000108>
- 13 48. Jasim HA, Sulaiman SABS, Khan Ah, et al. Factors affecting post caesarean pain intensity
- 14 among women in the northern peninsular of Malaysia. *Journal of Clinical and Diagnostic*
- 15 *Research* 2017;11(9):IC07-IC11. doi: <http://dx.doi.org/10.7860/JCDR/2017/25364.10630>
- 16 49. Kim S, Jung S, Choe J, et al. Predictive Factors for Pain After Endoscopic Resection of
- 17 Gastric Tumors. *Dig Dis Sci* 2016;61(12):3560-64. doi: 10.1007/s10620-016-4325-9
- 18 50. Lesin M, Lozo MD, Duplancic-Sundov Z, et al. Risk factors associated with postoperative
- 19 pain after ophthalmic surgery: A prospective study. *Therapeutics and Clinical Risk*
- 20 *Management* 2016;12:93-102. doi: <http://dx.doi.org/10.2147/TCRM.S97024>
- 21 51. Lunn TH, Gaarn-Larsen L, Kehlet H. Prediction of postoperative pain by preoperative pain
- 22 response to heat stimulation in total knee arthroplasty. *Pain* 2013;154(9):1878-85. doi:
- 23 <https://dx.doi.org/10.1016/j.pain.2013.06.008>
- 24 52. Mamie C, Bernstein M, Morabia A, et al. Are there reliable predictors of postoperative pain?
- 25 *Acta Anaesthesiologica Scandinavica* 2004;48(2):234-42. doi:
- 26 <http://dx.doi.org/10.1111/j.0001-5172.2004.00298.x>
- 27 53. Mei W, Seeling M, Franck M, et al. Independent risk factors for postoperative pain in need of
- 28 intervention early after awakening from general anaesthesia. *Eur J Pain* 2010;14(2):e1-
- 29 e7. doi: <http://dx.doi.org/10.1016/j.ejpain.2009.03.009>
- 30 54. Murray AA, Retief FW. Acute postoperative pain in 1 231 patients at a developing country
- 31 referral hospital: Incidence and risk factors. *Southern African Journal of Anaesthesia and*
- 32 *Analgesia* 2016;22(1):26-31. doi: <http://dx.doi.org/10.1080/22201181.2015.1115608>
- 33 55. Orbach-Zinger S, Fireman S, Ben-Haroush A, et al. Preoperative sleep quality predicts
- 34 postoperative pain after planned caesarean delivery. *European Journal of Pain (United*
- 35 *Kingdom)* 2017;21(5):787-94. doi: <http://dx.doi.org/10.1002/ejp.980>
- 36 56. Petrovic NM, Milovanovic DR, Ignjatovic Ristic D, et al. Factors associated with severe
- 37 postoperative pain in patients with total hip arthroplasty. *Acta Orthop Traumatol Turc*
- 38 2014;48(6):615-22. doi: <https://dx.doi.org/10.3944/AOTT.2014.14.0177>
- 39 57. Radinovic K, Milan Z, Markovic-Denic L, et al. Predictors of severe pain in the immediate
- 40 postoperative period in elderly patients following hip fracture surgery. *Injury*
- 41 2014;45(8):1246-50. doi: <https://dx.doi.org/10.1016/j.injury.2014.05.024>
- 42 58. Robleda G, Sillero-Sillero A, Puig T, et al. Influence of preoperative emotional state on
- 43 postoperative pain following orthopedic and trauma surgery. *Revista Latino-Americana*
- 44 *de Enfermagem (RLAE)* 2014;22(5):785-91. doi: 10.1590/0104-1169.0118.2481
- 45 59. Sanansilp V, Dejarkom S, Deetayart S. Postoperative pain management and the risk factors
- 46 in major operation: A baseline study of acute pain service, Siriraj Hospital. *J Med Assoc*
- 47 *Thai* 2016;99(5):549-56.
- 48
- 49
- 50
- 51
- 52
- 53
- 54
- 55
- 56
- 57
- 58
- 59
- 60

- 1  
2  
3  
4  
5  
6  
7  
8  
9  
10  
11  
12  
13  
14  
15  
16  
17  
18  
19  
20  
21  
22  
23  
24  
25  
26  
27  
28  
29  
30  
31  
32  
33  
34  
35  
36  
37  
38  
39  
40  
41  
42  
43  
44  
45  
46  
47  
48  
49  
50  
51  
52  
53  
54  
55  
56  
57  
58  
59  
60
60. Sommer M, de Rijke JM, van Kleef M, et al. Predictors of acute postoperative pain after elective surgery. *Clinical Journal of Pain* 2010;26(2):87-94. doi: <https://dx.doi.org/10.1097/AJP.0b013e3181b43d68>
  61. Storesund A, Krukhaug Y, Olsen MV, et al. Females report higher postoperative pain scores than males after ankle surgery. *Scand J Pain* 2016;12:85-93. doi: <https://dx.doi.org/10.1016/j.sjpain.2016.05.001>
  62. Tighe PJ, Riley JL, 3rd, Fillingim RB. Sex differences in the incidence of severe pain events following surgery: a review of 333,000 pain scores. *Pain Med* 2014;15(8):1390-404. doi: <https://dx.doi.org/10.1111/pme.12498>
  63. Zhao Y, Ding JH, Yin SH, et al. Predictors of early postoperative pain after stapled haemorrhoidopexy. *Colorectal Dis* 2014;16(6):O206-11. doi: <https://dx.doi.org/10.1111/codi.12531>
  64. Barsky AJ, Peekna HM, Borus JF. Somatic symptom reporting in women and men. *J Gen Intern Med* 2001;16(4):266-75. [published Online First: 2001/04/25]
  65. Aubrun F, Salvi N, Coriat P, et al. Sex- and age-related differences in morphine requirements for postoperative pain relief. *Anesthesiology* 2005;103(1):156-60. [published Online First: 2005/06/29]
  66. Chiang HL, Chia YY, Lin HS, et al. The Implications of Tobacco Smoking on Acute Postoperative Pain: A Prospective Observational Study. *Pain Res Manag* 2016;2016:9432493. doi: 10.1155/2016/9432493 [published Online First: 2016/07/23]
  67. Creekmore FM, Lugo RA, Weiland KJ. Postoperative opiate analgesia requirements of smokers and nonsmokers. *Ann Pharmacother* 2004;38(6):949-53. doi: 10.1345/aph.1D580 [published Online First: 2004/04/29]
  68. Kampe S, Wendland M, Welter S, et al. Independent Predictors for Higher Postoperative Pain Intensity During Recovery After Open Thoracic Surgery: A Retrospective Analysis in 621 Patients. *Pain Medicine* 2017;pnx238-pnx38. doi: 10.1093/pm/pnx238
  69. Angst MS, Clark JD. Opioid-induced hyperalgesia: a qualitative systematic review. *Anesthesiology* 2006;104(3):570-87. [published Online First: 2006/03/02]

**Table 1. Study characteristics of included studies.**

| Author, Year                           | Country of Origin | Sample Size | Incidence of Poor Post-operative Pain Control (%) | Mean Age in Years (SD)               | Study Design | Setting of Pain Assessment | Pain Scale* | Definition of Poor Pain Control | Time of Assessment <sup>d</sup> | Specialty | Pathology                             | No. of Predictors Examined |
|----------------------------------------|-------------------|-------------|---------------------------------------------------|--------------------------------------|--------------|----------------------------|-------------|---------------------------------|---------------------------------|-----------|---------------------------------------|----------------------------|
| Alves et al, 2013 <sup>39</sup>        | Brazil            | 139         | Not stated                                        | 51.7 (11.8)                          | PCS          | Ward                       | VAS         | >30                             | 24                              | GS        | Breast cancer                         | 3                          |
| Auburn et al, 2008 <sup>40</sup>       | France            | 342         | 41.5                                              | 48 (18)                              | PCS          | PACU                       | VAS & NRS   | Morphine >0.15mg/kg in PACU     | <24 hours                       | Mixed     | Mixed                                 | 3                          |
| Baudic et al, 2016 <sup>41</sup>       | France            | 100         | 14.0                                              | 55.2 (12.1)                          | PCS          | Ward                       | BPI         | ≥3                              | 48                              | GS        | Breast cancer                         | 9                          |
| Belii et al, 2014 <sup>42</sup>        | Moldolva          | 176         | Not stated                                        | Not stated                           | PCS          | Ward                       | NRS         | ≥5                              | 24                              | GS        | Abdominal pathologies                 | 3                          |
| Borges et al, 2016 <sup>43</sup>       | Brazil            | 1,062       | 78.4                                              | 25.1 (5.7)                           | PCS          | Ward                       | NRS         | ≥5                              | Immediate postoperative period  | Obstetric | Non-emergent cesarean section         | 14                         |
| Camuo et al, 2002 <sup>44</sup>        | Brazil            | 346         | 43.4                                              | 44.3 (9.6)                           | PCS          | PACU                       | VAS         | >30                             | 24                              | GS        | Abdominal pathologies                 | 15                         |
| Duan et al, 2017 <sup>45</sup>         | China             | 1002        | 15.5                                              | 49.5 (11.6)                          | PCS          | Ward                       | NRS         | ≥4                              | 24                              | Mixed     | Mixed                                 | 3                          |
| Genov et al, 2015 <sup>46</sup>        | Russia            | 321         | Not stated                                        | Not stated                           | RCS          | PACU                       | VAS         | >4                              | 12                              | Mixed     | Mixed                                 | 1                          |
| Gerbershagen et al, 2014 <sup>47</sup> | Germany           | 22,963      | 24.5                                              | 55.2 <sup>a</sup>                    | PCS          | Ward                       | NRS         | ≥7                              | 24                              | Mixed     | Mixed                                 | 3                          |
| Gorkem et al, 2016 <sup>21</sup>       | Turkey            | 80          | Not stated                                        | 29.7 (5.8)                           | PCS          | Ward                       | VAS         | >40                             | 18                              | Obstetric | Non-emergent cesarean section         | 16                         |
| Jae Chul et al, 2015 <sup>32, c</sup>  | Korea             | 10,575      | Not stated                                        | Young: 31.8 (5.8)<br>Old: 74.8 (4.4) | RCS          | Ward                       | NRS         | >4                              | 48                              | Mixed     | Mixed                                 | 5                          |
| Jasim et al, 2017 <sup>48</sup>        | Malaysia          | 400         | Not stated                                        | 30.4 (4.8)                           | RCS          | PACU and Ward              | VAS         | Not stated                      | 12                              | Obstetric | Non-emergent cesarean section         | 7                          |
| Katz et al, 2005 <sup>22</sup>         | United States     | 109         | 54.1                                              | 58.2 (12)                            | PCS          | Ward                       | NRS         | ≥5                              | 48                              | GS        | Breast cancer                         | 17                         |
| Kim et al, 2016 <sup>49</sup>          | United Kingdom    | 156         | 42.3                                              | 64.4 (10.9)                          | PCS          | Ward                       | NRS         | ≥5                              | 48                              | GS        | Gastric tumors (endoscopic resection) | 11                         |
| Lesin et al, 2016 <sup>50</sup>        | Croatia           | 226         | 19.9                                              | 67 (13)                              | PCS          | Ward                       | NRS         | ≥5                              | 6                               | Ophtho    | Ophthalmologic pathologies            | 19                         |

|                                         |               |       |                                          |                                                          |                  |      |                                             |                              |                  |            |                                       |    |
|-----------------------------------------|---------------|-------|------------------------------------------|----------------------------------------------------------|------------------|------|---------------------------------------------|------------------------------|------------------|------------|---------------------------------------|----|
| Liu et al, 2012 <sup>23, c</sup>        | United States | 897   | At rest: 22.4<br>Movement: 39.0          | 67 (11)                                                  | RCS <sup>e</sup> | Ward | NRS at rest & with activity VAS (activity ) | >4                           | 24               | Orthopedic | Primary total hip or knee replacement | 17 |
| Lunn et al, 2013 <sup>51</sup>          | Denmark       | 92    | 39.1                                     | Median 66 (IQR:13)                                       | PCS              | Ward |                                             | ≥60                          | 6-24             | Orthopedic | Total knee arthroplasty               | 4  |
| Mamie et al, 2004 <sup>52</sup>         | Switzerland   | 304   | 25.1                                     | 45 <sup>a</sup>                                          | PCS              | Ward | VAS                                         | >5                           | 24               | Mixed      | Abdominal and orthopedic pathologies  | 10 |
| Mei et al, 2010 <sup>53</sup>           | Germany       | 1,736 | 28.5                                     | Not stated                                               | PCS              | PACU | NRS                                         | >4                           | After extubation | Mixed      | Mixed                                 | 10 |
| Murray et al, 2016 <sup>54</sup>        | South Africa  | 1,231 | 61.9                                     | 44 <sup>b</sup>                                          | PCS              | Ward | VAS                                         | >40                          | 24               | Mixed      | Mixed                                 | 8  |
| Nishimura et al 2017 <sup>24</sup>      | Japan         | 64    | 48.4                                     | 60 (11)                                                  | PCS              | Ward | VAS                                         | >40                          | 6-60             | GS         | Partial mastectomy for cancer         | 8  |
| Orbach-Zinger, et al 2016 <sup>55</sup> | Israel        | 245   | Good sleeper: 12.8<br>Poor sleeper: 27.5 | Good sleeper: 34.9 (4.9)<br>Poor sleeper: 34.1 (4.9)     | PCS              | Ward | VRS                                         | >7                           | 24               | Obstetric  | Non-emergent cesarean section         | 3  |
| Persson et al, 2017 <sup>33, c</sup>    | Sweden        | 152   | Not stated                               | Median 49 (IQR: 29)                                      | PCS              | PACU | VAS                                         | >40                          | 1.5              | GS         | Laparoscopic cholecystectomy          | 2  |
| Petrovic et al, 2014 <sup>56</sup>      | Serbia        | 90    | 48.9                                     | High pain group: 64.2 (3.8),<br>Low pain group: 69 (3.9) | PCS              | Ward | NRS                                         | ≥5                           | 12               | Orthopedic | Total hip arthroplasty                | 15 |
| Radinovic et al, 2014 <sup>57</sup>     | Serbia        | 234   | Not stated                               | 71.2 (8.3)                                               | PCS              | PACU | NRS                                         | ≥7                           | 1                | Orthopedic | Hip fractures                         | 14 |
| Rakel et al, 2012 <sup>34, c</sup>      | United States | 215   | Moderate pain: 46.0<br>Severe pain: 27.0 | 61.7 (9.8)                                               | PCS              | Ward | NRS (0-21)                                  | 8-14 (mod)<br>15-20 (severe) | 48               | Orthopedic | Total knee arthroplasty               | 17 |
| Rehberg et al, 2017 <sup>19</sup>       | Switzerland   | 198   | 44.9                                     | 57.5 (12.5)                                              | PCS              | Ward | NRS                                         | >3                           | 24               | GS         | Breast cancer                         | 15 |

|                                     |               |       |      |                                                  |                  |               |             |     |                                 |            |                                 |    |
|-------------------------------------|---------------|-------|------|--------------------------------------------------|------------------|---------------|-------------|-----|---------------------------------|------------|---------------------------------|----|
| Robleda et al, 2014 <sup>58</sup>   | Spain         | 127   | 61.0 | 71.0 (18)                                        | RCS              | PACU          | NRS         | ≥4  | Immediate in PACU               | Orthopedic | Femur fractures and prosthetics | 15 |
| Sananslip et al, 2016 <sup>59</sup> | Thailand      | 340   | 28.5 | 54.8 (17.8)                                      | PCS              | Ward          | NRS         | ≥4  | 24-48                           | Mixed      | Mixed                           | 12 |
| Sommer et al, 2010 <sup>60</sup>    | Netherlands   | 1,300 | 30.2 | 56 (15.5)                                        | PCS              | Ward          | VAS         | >40 | 24                              | Mixed      | Mixed                           | 15 |
| Storesund et al, 2016 <sup>61</sup> | Norway        | 336   | 67.3 | 52 <sup>b</sup>                                  | RCS <sup>e</sup> | PACU          | VAS or vNRS | ≥4  | At time of transfer out of PACU | Orthopedic | Ankle fractures                 | 15 |
| Tighe et al, 2014 <sup>62</sup>     | United States | 7,731 | 60.9 | Female: 56.4 <sup>b</sup> Male 56.6 <sup>b</sup> | RCS              | Ward          | NRS         | ≥7  | 24                              | Mixed      | Mixed                           | 1  |
| Zhao et al, 2014 <sup>63</sup>      | China         | 73    | 58.9 | Median 43 (IQR:57)                               | PCS              | PACU and Ward | VAS         | >30 | 24                              | GS         | Hemorrhoids                     | 12 |

\*Pain measured at rest, unless otherwise stated.

<sup>a</sup> Authors' estimate (study only included age ranges).

<sup>b</sup> Variance not stated.

<sup>c</sup> Studies which divided their dataset into two groups when evaluating predictors: Jae Chul et al: young vs old age group; Liu et al: NRS at rest vs with activity; Persson et al: female vs male; Rakel et al: moderate vs severe pain outcome.

<sup>d</sup> Time of assessment measured in hours.

<sup>e</sup> Labelled as a cross-sectional study design by study authors, but methodology more represent a retrospective cohort study design.

BPI- Brief pain index (0-10), VAS- Visual Analogue Scale for Pain (0-100mm), NRS- Numeric Rating Scale for Pain (0-10), vNRS- Verbal Numeric, Rating Scale for Pain (0-10), Mixed- more than one specialty or pathology, PCS- Prospective Cohort Study, RCS-Retrospective Cohort Study, and GS- General Surgery

**Table 2. Pooled odds ratios and definitions of preoperative predictors of poor postoperative pain control.**

| Preoperative predictor         | No. of studies included in pooled estimate | No. of patients | Odds ratio (95% CI) | p-value | I <sup>2</sup> statistic | Definition                                                                                                                                                                                                    |
|--------------------------------|--------------------------------------------|-----------------|---------------------|---------|--------------------------|---------------------------------------------------------------------------------------------------------------------------------------------------------------------------------------------------------------|
| Younger age                    | 14                                         | 5,577           | 1.18 (1.05 to 1.32) | <0.001  | 79.7%*                   | Authors' cutoff (range ≤31 to <70 years)                                                                                                                                                                      |
| Female sex                     | 20                                         | 48,753          | 1.29 (1.17 to 1.43) | <0.001  | 71%*                     | Female sex                                                                                                                                                                                                    |
| Smoking                        | 9                                          | 15,764          | 1.33 (1.09 to 1.61) | 0.005   | 55.8%*                   | Self-reported (any amount)                                                                                                                                                                                    |
| History of depressive symptoms | 8                                          | 3,042           | 1.71 (1.32 to 2.21) | 0.018   | 12.6%                    | Self-reported, any use of antidepressants or at least moderate score on depression scale (Hamilton Depression Rating Scale ≥19, Montgomery-Asberg Depression Rating Scale >13, Geriatric Depression Scale >6) |
| History of anxiety symptoms    | 10                                         | 2,598           | 1.22 (1.09 to 1.36) | 0.001   | 82.4%*                   | Self-reported or moderate to severe score on anxiety scale (State Anxiety Inventory ≥30 to >46, Hamilton Anxiety Scale ≥25, Numeric Rating Scale for Anxiety ≥5)                                              |
| Sleep difficulty               | 2                                          | 549             | 2.32 (1.46 to 3.69) | <0.001  | 0%                       | Self-reported chronic sleep difficulties or score >5 on the Pittsburgh Sleep Quality Index                                                                                                                    |
| BMI (continuous)               | 2                                          | 1,095           | 1.02 (1.01 to 1.03) | <0.001  | 0%                       | BMI as a continuous variable                                                                                                                                                                                  |
| Presence of preoperative pain  | 13                                         | 4,733           | 1.21 (1.10-1.32)    | <0.001  | 50.4%*                   | Self-reported, any preoperative pain                                                                                                                                                                          |
| Preoperative analgesia use     | 6                                          | 2,448           | 1.54 (1.18 to 2.03) | 0.002   | 44.0%                    | Self-reported use of preoperative analgesia or opioids                                                                                                                                                        |
| Age (continuous)               | 9                                          | 26,846          | 0.97 (0.93 to 1.01) | 0.16    | 93.5%*                   | Age as a continuous variable                                                                                                                                                                                  |
| Higher education               | 8                                          | 2,272           | 0.97 (0.69 to 1.38) | 0.89    | 43.4%                    | Authors' cutoff from self-reported levels of education (range: >9 years of education to college or postgraduate degree)                                                                                       |
| History of surgery             | 8                                          | 3,954           | 1.15 (0.97 to 1.37) | 0.10    | 33.9%                    | Any self-reported previous surgical history                                                                                                                                                                   |
| Alcohol use                    | 5                                          | 3,851           | 0.89 (0.72 to 1.11) | 0.29    | 26.2%                    | Self-reported alcohol use (range from any to dependence)                                                                                                                                                      |
| Low ASA physical status        | 5                                          | 3,629           | 0.94 (0.59 to 1.51) | 0.80    | 79.0%*                   | ASA I compared to II or III                                                                                                                                                                                   |
| High BMI (dichotomous)         | 5                                          | 1,926           | 1.23 (0.98 to 1.55) | 0.069   | 66.5%*                   | Authors' cutoff (range from >30 to >40 kg/m <sup>2</sup> )                                                                                                                                                    |
| Chronic pain                   | 4                                          | 1,583           | 0.96 (0.65 to 1.42) | 0.84    | 59.5%                    | Self-reported chronic pain                                                                                                                                                                                    |
| Diabetes                       | 4                                          | 1,287           | 1.02 (0.73 to 1.42) | 0.90    | 0%                       | Self-reported history of diabetes                                                                                                                                                                             |

|                                          |   |        |                     |      |        |                                                                                                                                                              |
|------------------------------------------|---|--------|---------------------|------|--------|--------------------------------------------------------------------------------------------------------------------------------------------------------------|
| Pain catastrophizing scale (continuous)  | 4 | 407    | 1.02 (0.98 to 1.05) | 0.37 | 64.8%* | Pain Catastrophizing Scale scores as a continuous variable                                                                                                   |
| Marital status                           | 3 | 1,571  | 1.42 (0.62 to 3.23) | 0.41 | 60.1%  | Self-reported as single or not married                                                                                                                       |
| Orthopedic procedure                     | 3 | 10,879 | 1.06 (0.72 to 1.57) | 0.77 | 76.3%* | Orthopedic procedure compared to abdominal surgery                                                                                                           |
| Preoperative pressure pain tolerance     | 3 | 536    | 0.85 (0.69 to 1.06) | 0.14 | 81.0%* | Preoperative pressure pain tolerance as measured by Wagner Force Ten Digital Force Gage FPX 50 or hand-held pressure algometer (Somedic AB, Farsta, Sweden). |
| Low socioeconomic status                 | 2 | 1,288  | 0.85 (0.49 to 1.47) | 0.56 | 0%     | Brazilian Economic Classification Criteria Classes D or E or monthly family net income less than 750 US dollars                                              |
| Pain catastrophizing scale (dichotomous) | 2 | 1,476  | 1.47 (0.67 to 3.22) | 0.34 | 73.0%  | Authors' cutoff (range from $\geq$ or $>15$ )                                                                                                                |

\*significant Cochran Q test ( $p < 0.05$ )

BMI- body mass index ( $\text{kg}/\text{m}^2$ )

ASA- American Society of Anesthesiologist

CI- confidence interval

## Figure Legends

**Figure 1. Systematic Review & Meta-Analysis Flow Diagram.** All database and grey literature search was performed on October 13<sup>th</sup>, 2017.

**Figure 2. Assessment of study quality.** 1: adequate description of population, 2: non-biased selection, 3: adequate predictor measurement, 4: adequate outcome measurement, 5: blinded outcome assessment (to predictor), 6: adequate statistical adjustment, 7: precision of results, 8: reference standard, and 9: low loss to follow up. Green: low-risk of bias, yellow: unclear-risk of bias, red: high-risk of bias.

**Figure 3. Summary forest plot for significant preoperative predictors of poor postoperative pain control.** Odds ratios are shown with 95 percent confidence intervals. The number of studies included in the meta-analysis for each predictor is indicated.

**Figure S1. Forest Plot of Preoperative Predictors of Postoperative Pain.** a) female sex b) younger age, and c) smoking history.

**Figure S2. Forest Plot of Significant Preoperative Predictors of Postoperative Pain.** a) history of depression symptoms, b) presence of preoperative pain, and c) history of anxiety symptoms.

**Figure S3. Forest Plot of Significant Preoperative Predictors of Postoperative Pain.** a) preoperative analgesia, b) body mass index (continuous), and c) history of sleeping difficulty.

**Figure S4. Forest Plot of Non-Significant Preoperative Predictors of Postoperative Pain.** a) age (continuous), b) higher education, and c) history of surgery.



1  
2  
3  
4 **Figure S5. Forest Plot of Non-Significant Preoperative Predictors of Postoperative Pain.** a)

5  
6 alcohol use, b) low ASA, and c) BMI (dichotomous).  
7  
8  
9

10  
11 **Figure S6. Forest Plot of Non-Significant Preoperative Predictors of Postoperative Pain.** a)

12  
13 chronic pain, b) diabetes, and c) pain catastrophizing scale (continuous).  
14  
15  
16

17  
18 **Figure S7. Forest Plot of Non-Significant Preoperative Predictors of Postoperative Pain.** a) marital

19  
20 status, b) orthopedic surgery, and c) preoperative pressure tolerance.  
21  
22  
23

24  
25 **Figure S8. Forest Plot of Non-Significant Preoperative Predictors of Postoperative Pain.** a) low

26  
27 socioeconomic status and b) pain catastrophizing scale (dichotomous).  
28  
29  
30  
31  
32  
33  
34  
35  
36  
37  
38  
39  
40  
41  
42  
43  
44  
45  
46  
47  
48  
49  
50  
51  
52  
53  
54  
55  
56  
57  
58  
59  
60

1  
2 **Table Legend**  
3  
4  
5  
6

7 **Table 1. Study characteristics of included studies.**  
8  
9

10  
11  
12 **Table 2. Pooled odds ratios and definitions of preoperative predictors of poor postoperative pain**  
13 **control.**  
14  
15

16  
17  
18 **Table S1. Quality indicators for studies of prognosis.<sup>35</sup>**  
19  
20  
21  
22  
23  
24  
25  
26  
27  
28  
29  
30  
31  
32  
33  
34  
35  
36  
37  
38  
39  
40  
41  
42  
43  
44  
45  
46  
47  
48  
49  
50  
51  
52  
53  
54  
55  
56  
57  
58  
59  
60

1  
2  
3  
4  
5  
6  
7  
8  
9  
10  
11  
12  
13  
14  
15  
16  
17  
18  
19  
20  
21  
22  
23  
24  
25  
26  
27  
28  
29  
30  
31  
32  
33  
34  
35  
36  
37  
38  
39  
40  
41  
42  
43  
44  
45  
46  
47  
48  
49  
50  
51  
52  
53  
54  
55  
56  
57  
58  
59  
60

**Appendix Legend**

**Appendix S1. Database Search Strategy.** Themes were combined with Boolean operator “and” and within-theme were combined with Boolean operator “or”.

For peer review only

## Author Statement

All authors satisfy the requirement for authorship as per ICMJE.

MMY: conception and design of work; acquisition, analysis and interpretation of data; drafting initial draft of manuscript; critical review and final approval of manuscript.

RLH: design of work; acquisition, analysis and interpretation of data; critical review and final approval of manuscript.

AAL: design of work; analysis and interpretation of data; critical review and final approval of manuscript.

PER: design of work; analysis and interpretation of data; critical review and final approval of manuscript.

NJ: design of work; interpretation of data; critical review and final approval of manuscript.

SC: design of work; interpretation of data; critical review and final approval of manuscript.

JC: design of work; interpretation of data; critical review and final approval of manuscript.



45 Figure 1. Systematic Review & Meta-Analysis Flow Diagram. All database and grey literature search was  
46 performed on October 13th, 2017.

47 215x279mm (300 x 300 DPI)

1  
2  
3  
4  
5  
6  
7  
8  
9  
10  
11  
12  
13  
14  
15  
16  
17  
18  
19  
20  
21  
22  
23  
24  
25  
26  
27  
28  
29  
30  
31  
32  
33  
34  
35  
36  
37  
38  
39  
40  
41  
42  
43  
44  
45  
46  
47  
48  
49  
50  
51  
52  
53  
54  
55  
56  
57  
58  
59  
60

|                    | 1 | 2 | 3 | 4 | 5 | 6 | 7 | 8 | 9 |
|--------------------|---|---|---|---|---|---|---|---|---|
| Alves 2013         | + | + | + | + | ? | - | + | + | + |
| Auburn 2008        | + | ? | + | + | ? | - | + | + | + |
| Baudic 2016        | + | + | + | - | ? | + | + | + | + |
| Belii 2014         | + | + | + | + | ? | - | + | + | + |
| Borges 2016        | + | + | - | + | ? | - | + | + | + |
| Camuo 2012         | + | + | + | + | + | + | + | + | + |
| Duan 2017          | + | ? | + | + | ? | + | + | + | + |
| Genov 2015         | + | + | + | + | ? | + | + | + | + |
| Gerbershagen 2014  | + | + | + | + | + | - | + | + | + |
| Gorkem 2016        | + | + | - | + | + | - | + | + | + |
| Jae Chul 2015      | + | + | + | + | - | + | + | + | + |
| Jasim 2017         | + | + | + | + | ? | + | + | - | + |
| Katz 2005          | + | + | + | + | ? | + | + | + | + |
| Kim 2016           | + | + | + | + | ? | - | + | + | + |
| Lesin 2016         | + | ? | + | + | ? | + | + | + | + |
| Liu 2012           | + | + | + | + | ? | + | + | + | + |
| Lunn 2013          | + | + | + | + | + | + | + | + | + |
| Mamie 2004         | + | + | - | + | + | + | + | + | + |
| Mei 2010           | + | + | + | + | ? | + | + | + | + |
| Murray 2016        | + | + | + | + | ? | + | + | + | + |
| Nishimura 2017     | + | + | + | + | ? | - | + | + | + |
| Orbach-Zinger 2016 | + | + | + | + | + | + | + | + | + |
| Persson 2017       | + | + | + | + | ? | + | + | + | + |
| Petrovic 2014      | + | + | - | + | ? | + | + | + | + |
| Radinovic 2014     | + | + | + | + | ? | + | + | + | + |
| Rakel 2012         | + | + | + | + | ? | - | + | + | + |
| Rehberg 2017       | + | + | + | + | + | + | + | + | + |
| Robleda 2014       | + | ? | ? | + | ? | - | + | + | + |
| Sananslip 2016     | + | + | + | + | ? | + | + | + | + |
| Sommer 2010        | + | + | + | + | + | + | + | + | + |
| Storesund 2016     | + | + | + | + | ? | + | + | + | + |
| Tighe 2014         | + | + | + | + | ? | - | + | + | + |
| Zhao 2014          | + | + | + | + | ? | - | + | + | + |

Figure 2. Assessment of study quality. 1: adequate description of population, 2: non-biased selection, 3: adequate predictor measurement, 4: adequate outcome measurement, 5: blinded outcome assessment (to predictor), 6: adequate statistical adjustment, 7: precision of results, 8: reference standard, and 9: low loss to follow up. Green: low-risk of bias, yellow: unclear-risk of bias, red: high-risk of bias.

215x279mm (300 x 300 DPI)



Figure 3. Summary forest plot for significant preoperative predictors of poor postoperative pain control. Odds ratios are shown with 95 percent confidence intervals. The number of studies included in the meta-analysis for each predictor is indicated.

275x205mm (300 x 300 DPI)

**Table S1. Quality indicators for studies of prognosis.**<sup>35</sup>

| <b>Quality Indicators</b>                 | <b>Description</b>                                                                                                                                                                |
|-------------------------------------------|-----------------------------------------------------------------------------------------------------------------------------------------------------------------------------------|
| <b>Adequate description of population</b> | Study described inclusion criteria for selecting patients, and when enrolled patients described demographics (at least age and sex).                                              |
| <b>Non-biased selection</b>               | Study either reported enrolling (or attempting to enroll) a consecutive series of patients meeting the inclusion criteria, or a random sample.                                    |
| <b>Low loss to follow-up</b>              | Postoperative pain measurements were available for at least 80% of patients for whom exposure data were collected.                                                                |
| <b>Adequate predictor measurement</b>     | Study described reproducible and appropriate methods for measuring relevant predictors.                                                                                           |
| <b>Adequate outcome measurement</b>       | Study utilized one of the following validated pain scales: VAS, VRS, and NRS.                                                                                                     |
| <b>Blinded outcome assessments</b>        | Study reported that outcomes were assessed by persons without knowledge of prognostic factors or that the pain outcome was determined by personnel not aware of study objectives. |
| <b>Adequate statistical adjustment</b>    | Study performed statistical adjustment or controlled for at least 3 potential confounders using acceptable statistical methods.                                                   |
| <b>Precision of results</b>               | Confidence intervals reported for the main outcomes of the study.                                                                                                                 |
| <b>Reference standard</b>                 | The study defined what was considered poor or good postoperative pain control.                                                                                                    |

VAS- visual analogue scale, VRS- verbal rating scale, NRS- numeric rating scale



### Female Sex



b)

### Younger Age



c)

### Smoking

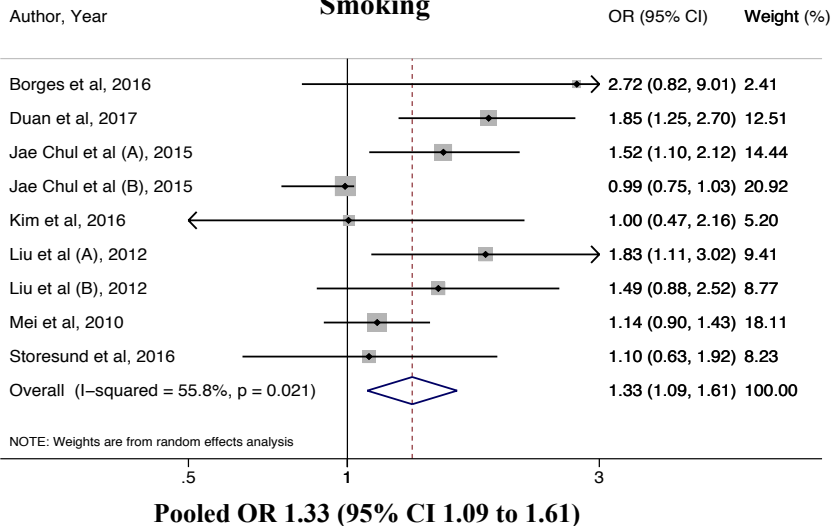

For peer review only - <http://bmjopen.bmj.com/site/about/guidelines.xhtml>

Figure S1. Forest Plot of Preoperative Predictors of Postoperative Pain. a) female sex b) younger age, and c) smoking history.

a)



b)



c)



For peer review only - <http://bmjopen.bmj.com/site/about/guidelines.xhtml>

**Figure S2. Forest Plot of Significant Preoperative Predictors of Postoperative Pain.** a) history of depression symptoms, b) presence of preoperative pain, and c) history of anxiety symptoms.

a)

**Preoperative Analgesia**

b)

**Body Mass Index**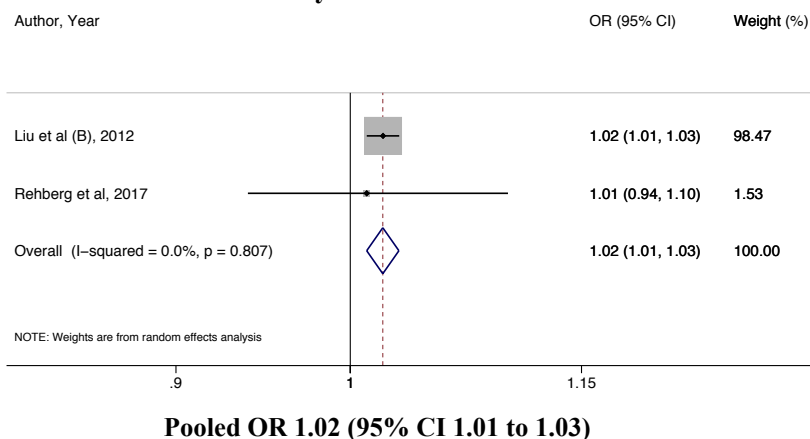

c)

**Sleep Difficulty**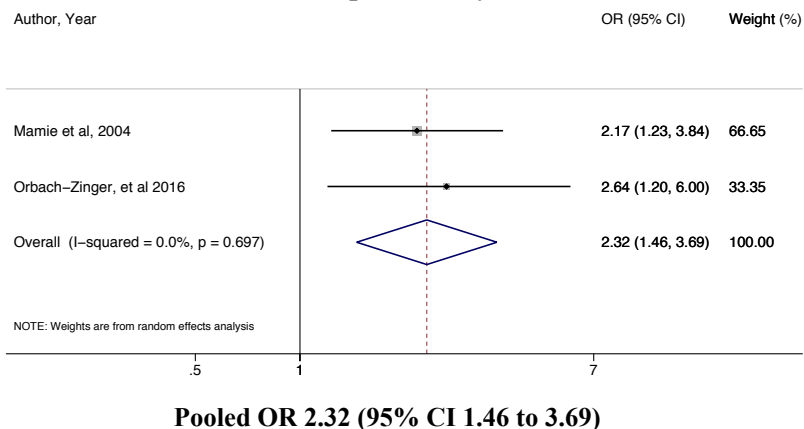

**Figure S3. Forest Plot of Significant Preoperative Predictors of Postoperative Pain.**  
 a) preoperative analgesia, b) body mass index (continuous), and c) history of sleeping difficulty.

a)



b)



c)



**Figure S4. Forest Plot of Non-Significant Preoperative Predictors of Postoperative Pain.** a) age (continuous), b) higher education, and c) history of surgery.

## Alcohol Use



Figure S5. Forest Plot of Non-Significant Preoperative Predictors of Postoperative Pain. a) alcohol use, b) low ASA, and c) BMI (dichotomous).

a)

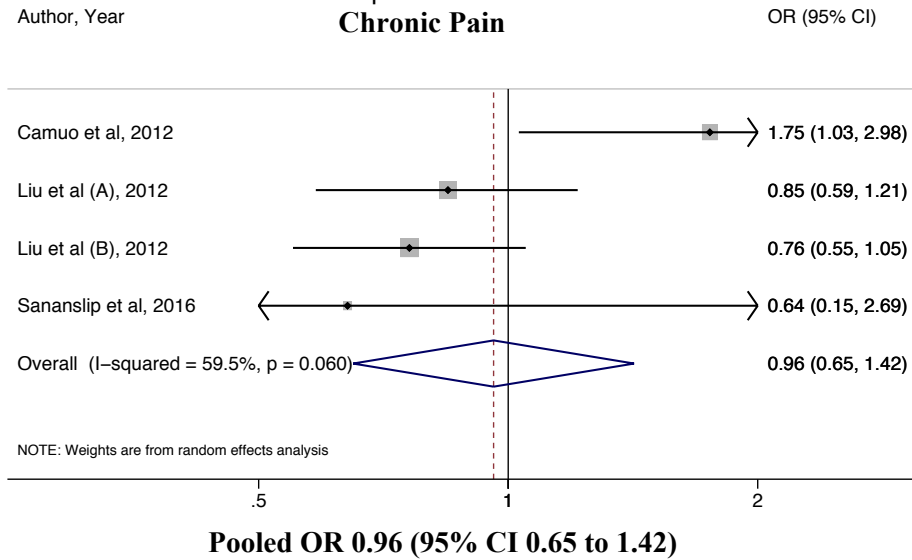

b)

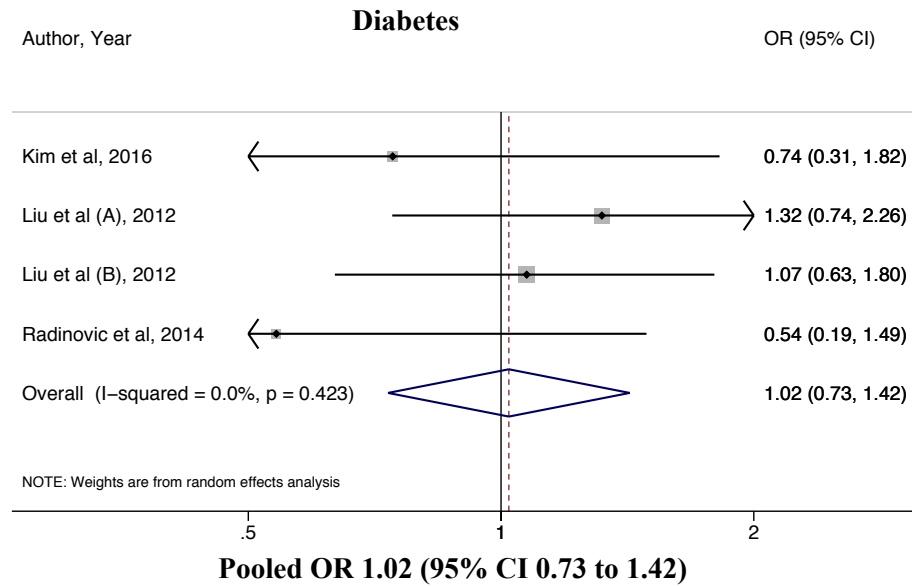

c)

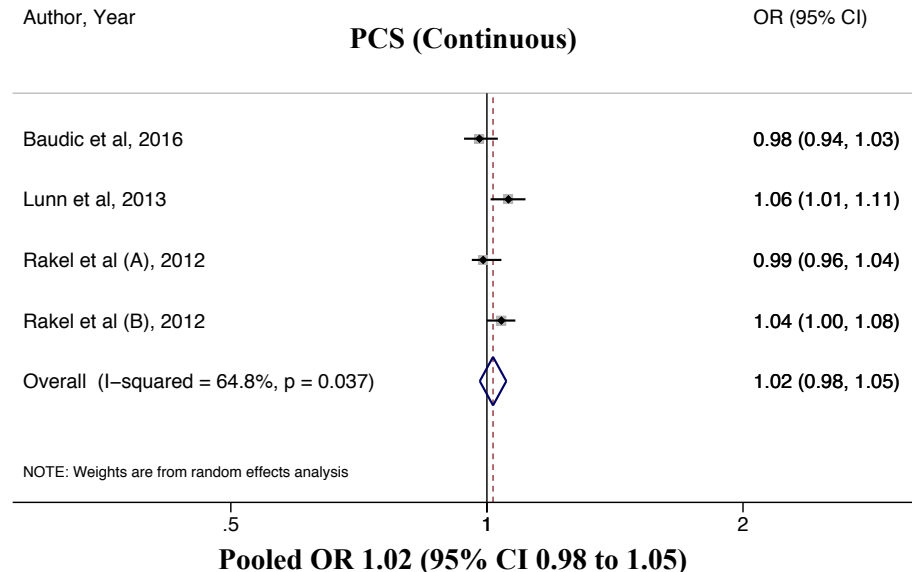

Figure S6. Forest Plot of Non-Significant Preoperative Predictors of Postoperative Pain. a) chronic pain, b) diabetes, and c) pain catastrophizing scale (continuous).

BMJ Open  
Marital Status



Figure S7. Forest Plot of Non-Significant Preoperative Predictors of Postoperative Pain. a) marital status, b) orthopedic surgery, and c) preoperative pressure tolerance.

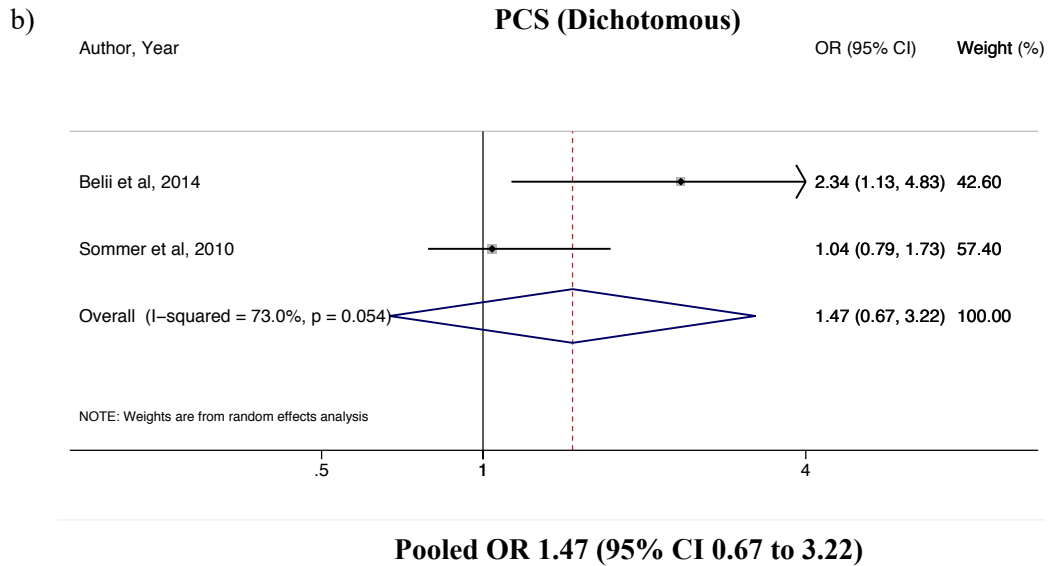

**Figure S8. Forest Plot of Non-Significant Preoperative Predictors of Postoperative Pain. a)** low socioeconomic status and **b)** pain catastrophizing scale (dichotomous).



**Appendix S1. Database Search Strategy.** Themes were combined with Boolean operator “and” and within-theme were combined with Boolean operator “or”.

| <b>MEDLINE</b>          |                                                                                                                                                                                                                                                                                                                                                                                                                                                         |
|-------------------------|---------------------------------------------------------------------------------------------------------------------------------------------------------------------------------------------------------------------------------------------------------------------------------------------------------------------------------------------------------------------------------------------------------------------------------------------------------|
| <b>Pain</b>             | <ol style="list-style-type: none"> <li>1. Pain, Postoperative/</li> <li>2. pain adj2 postoperati*.tw, kw</li> <li>3. pain adj2 post-operati*.tw, kw</li> <li>4. pain adj2 post operati*.tw, kw</li> <li>5. pain adj1 operati*.tw, kw</li> <li>6. post adj procedur* adj pain.tw, kw</li> <li>7. surg* adj1 pain.tw,kw</li> </ol>                                                                                                                        |
| <b>Pain Measurement</b> | <ol style="list-style-type: none"> <li>1. Pain Measurement/</li> <li>2. Pain adj measurement*.tw,kw</li> <li>3. Numeric adj rating adj scale.tw,kw</li> <li>4. NRS.tw,kw</li> <li>5. Visual adj analogue adj scale.tw,kw</li> <li>6. VAS.tw,kw</li> <li>7. Verbal adj rating adj scale.tw,kw</li> <li>8. VRS.tw,kw</li> </ol>                                                                                                                           |
| <b>Surgery</b>          | <ol style="list-style-type: none"> <li>1. EXP surgical procedures, operative/</li> <li>2. surger*.tw,kw</li> <li>3. operative*.tw,kw</li> <li>4. Surgical.tw,kw</li> <li>5. Operation*.tw,kw</li> </ol>                                                                                                                                                                                                                                                 |
| <b>Predictors</b>       | <ol style="list-style-type: none"> <li>1. predictor*.tw,kw</li> <li>2. Protective factors/ or risk assessment/ or risk factors/</li> <li>3. Risk adj factor*.tw,kw</li> <li>4. risk adj assessment*.tw,kw</li> <li>5. protective adj factor*.tw,kw</li> <li>6. Prevalence/</li> <li>7. Prevalence.tw,kw</li> <li>8. Incidence/</li> <li>9. Incidence.tw,kw</li> <li>10. Prognosis/</li> <li>11. Prognos*.tw,kw</li> <li>12. correlati*.tw,kw</li> </ol> |
| <b>EMBASE</b>           |                                                                                                                                                                                                                                                                                                                                                                                                                                                         |
| <b>Pain</b>             | <ol style="list-style-type: none"> <li>1. Pain, Postoperative/</li> <li>2. Pain adj2 postoperati*.tw,kw</li> <li>3. Pain adj2 post-operati*.tw,kw</li> <li>4. Pain adj2 post operati*.tw,kw</li> </ol>                                                                                                                                                                                                                                                  |

|    |                         |                                                  |
|----|-------------------------|--------------------------------------------------|
| 1  |                         |                                                  |
| 2  |                         |                                                  |
| 3  |                         |                                                  |
| 4  |                         | 5. Pain adj1 operati*.tw,kw                      |
| 5  |                         | 6. Post adj procedur* adj pain.tw,kw             |
| 6  |                         | 7. Surg* adj1 pain.tw,kw                         |
| 7  |                         |                                                  |
| 8  | <b>Pain Measurement</b> | 1. Pain adj measurement*.tw,kw                   |
| 9  |                         | 2. Numeric adj rating adj scale.tw,kw            |
| 10 |                         | 3. NRS.tw,kw                                     |
| 11 |                         | 4. Visual adj analogue adj scale.tw,kw           |
| 12 |                         | 5. VAS.tw,kw                                     |
| 13 |                         | 6. Verbal adj rating adj scale.tw,kw             |
| 14 |                         | 7. VRS.tw,kw                                     |
| 15 |                         | 8. Exp pain assessment/ or exp pain measurement/ |
| 16 |                         |                                                  |
| 17 |                         |                                                  |
| 18 | <b>Surgery</b>          | 1. Exp surgery/                                  |
| 19 |                         | 2. Surger*.tw,kw                                 |
| 20 |                         | 3. Operative*.tw,kw                              |
| 21 |                         | 4. Operation*.tw,kw                              |
| 22 |                         |                                                  |
| 23 |                         |                                                  |
| 24 | <b>Predictors</b>       | 1. Predictor*.tw,kw                              |
| 25 |                         | 2. Risk adj factor*.tw,kw                        |
| 26 |                         | 3. Prevalence/                                   |
| 27 |                         | 4. Prevalence.tw,kw                              |
| 28 |                         | 5. Incidence/                                    |
| 29 |                         | 6. Incidence.tw,kw                               |
| 30 |                         | 7. Prognosis/                                    |
| 31 |                         | 8. Prognos*.tw,kw                                |
| 32 |                         | 9. Correlati*.tw,kw                              |
| 33 |                         | 10. "Prediction and forecasting"/                |
| 34 |                         | 11. risk assessment/                             |
| 35 |                         | 12. risk factor/                                 |
| 36 |                         | 13. protective adj factor*.tw,kw                 |
| 37 |                         | 14. risk adj assessment.tw,kw                    |
| 38 |                         |                                                  |
| 39 |                         |                                                  |
| 40 |                         |                                                  |
| 41 |                         |                                                  |
| 42 | <b>PsychInfo</b>        |                                                  |
| 43 | <b>Pain</b>             | 1. Pain adj2 postoperati*.tw                     |
| 44 |                         | 2. Pain adj2 post-operati*.tw                    |
| 45 |                         | 3. Pain adj2 post operati*.tw                    |
| 46 |                         | 4. Pain adj1 operati*.tw                         |
| 47 |                         | 5. Post adj procedur* adj pain.tw                |
| 48 |                         | 6. Surg* adj1 pain.tw                            |
| 49 |                         | 7. Exp Pain                                      |
| 50 |                         |                                                  |
| 51 |                         |                                                  |
| 52 | <b>Pain Measurement</b> | 1. Pain Measurement/                             |
| 53 |                         | 2. Pain adj measurement*.tw                      |
| 54 |                         | 3. Numeric adj rating adj scale.tw               |
| 55 |                         |                                                  |
| 56 |                         |                                                  |
| 57 |                         |                                                  |
| 58 |                         |                                                  |
| 59 |                         |                                                  |
| 60 |                         |                                                  |

|    |                         |                                                    |
|----|-------------------------|----------------------------------------------------|
| 1  |                         |                                                    |
| 2  |                         |                                                    |
| 3  |                         |                                                    |
| 4  |                         | 4. NRS.tw                                          |
| 5  |                         | 5. Visual adj analogue adj scale.tw                |
| 6  |                         | 6. VAS.tw                                          |
| 7  |                         | 7. Verbal adj rating adj scale.tw                  |
| 8  |                         | 8. VRS.tw                                          |
| 9  |                         |                                                    |
| 10 |                         |                                                    |
| 11 | <b>Surgery</b>          | 1. surger*.tw                                      |
| 12 |                         | 2. operative*.tw                                   |
| 13 |                         | 3. Surgical.tw                                     |
| 14 |                         | 4. Operation*.tw                                   |
| 15 |                         | 5. Exp surgery/                                    |
| 16 |                         |                                                    |
| 17 |                         |                                                    |
| 18 |                         |                                                    |
| 19 | <b>Predictors</b>       | 1. predictor*.tw                                   |
| 20 |                         | 2. Protective factors/ or risk assessment/ or risk |
| 21 |                         | factors/                                           |
| 22 |                         | 3. Risk adj factor*.tw                             |
| 23 |                         | 4. risk adj assessment*.tw                         |
| 24 |                         | 5. protective adj factor*.tw                       |
| 25 |                         | 6. Prevalence.tw                                   |
| 26 |                         | 7. Incidence.tw                                    |
| 27 |                         | 8. Prognosis/                                      |
| 28 |                         | 9. Prognos*.tw                                     |
| 29 |                         | 10. correlati*.tw                                  |
| 30 |                         |                                                    |
| 31 |                         |                                                    |
| 32 |                         |                                                    |
| 33 |                         |                                                    |
| 34 | <b>CINAHL</b>           |                                                    |
| 35 | <b>Pain</b>             | 1. MH “postoperative pain”                         |
| 36 |                         | 2. Postoperative pain                              |
| 37 |                         | 3. Pain AND (surgery or surgical or operative or   |
| 38 |                         | operative)”                                        |
| 39 |                         |                                                    |
| 40 | <b>Pain Measurement</b> | 1. MH “pain measurement”                           |
| 41 |                         | 2. Pain measurement                                |
| 42 |                         | 3. Pain assessment or pain scale or pain tool      |
| 43 |                         | 4. Nrs or numeric rating scale                     |
| 44 |                         | 5. Vas or visual analogue scale OR visual analog   |
| 45 |                         | scale                                              |
| 46 |                         | 6. Vrs or verbral rating scale                     |
| 47 |                         |                                                    |
| 48 |                         |                                                    |
| 49 |                         |                                                    |
| 50 |                         |                                                    |
| 51 | <b>Surgery</b>          | 1. MH “surgery, operative”                         |
| 52 |                         | 2. Surgery or operation or surgical procedure      |
| 53 |                         |                                                    |
| 54 |                         |                                                    |
| 55 |                         |                                                    |
| 56 | <b>Predictors</b>       | 1. MH “independent variable”                       |
| 57 |                         |                                                    |
| 58 |                         |                                                    |
| 59 |                         |                                                    |
| 60 |                         |                                                    |

2. Predictors
3. MH “risk factors”
4. MH “risk assessment”
5. Risk factors
6. MH “prevalence”
7. Prevalence
8. Incidence
9. MH “incidence”
10. MH “prognosis”
11. Prognosis

For peer review only

## MOOSE Checklist for Meta-analyses of Observational Studies

| Item No                                     | Recommendation                                                                                                                                                                                                                                                               | Reported on Page No         |
|---------------------------------------------|------------------------------------------------------------------------------------------------------------------------------------------------------------------------------------------------------------------------------------------------------------------------------|-----------------------------|
| Reporting of background should include      |                                                                                                                                                                                                                                                                              |                             |
| 1                                           | Problem definition                                                                                                                                                                                                                                                           | 4                           |
| 2                                           | Hypothesis statement                                                                                                                                                                                                                                                         | 4                           |
| 3                                           | Description of study outcome(s)                                                                                                                                                                                                                                              | 6                           |
| 4                                           | Type of exposure or intervention used                                                                                                                                                                                                                                        | 6, Table 2                  |
| 5                                           | Type of study designs used                                                                                                                                                                                                                                                   | 6                           |
| 6                                           | Study population                                                                                                                                                                                                                                                             | 6, 7                        |
| Reporting of search strategy should include |                                                                                                                                                                                                                                                                              |                             |
| 7                                           | Qualifications of searchers (eg, librarians and investigators)                                                                                                                                                                                                               | 5                           |
| 8                                           | Search strategy, including time period included in the synthesis and key words                                                                                                                                                                                               | 5, 6 and Appendix S1        |
| 9                                           | Effort to include all available studies, including contact with authors                                                                                                                                                                                                      | 5-7                         |
| 10                                          | Databases and registries searched                                                                                                                                                                                                                                            | 5                           |
| 11                                          | Search software used, name and version, including special features used (eg, explosion)                                                                                                                                                                                      | 5 and Appendix S1           |
| 12                                          | Use of hand searching (eg, reference lists of obtained articles)                                                                                                                                                                                                             | 5, 6                        |
| 13                                          | List of citations located and those excluded, including justification                                                                                                                                                                                                        | Figure 1                    |
| 14                                          | Method of addressing articles published in languages other than English                                                                                                                                                                                                      | 7                           |
| 15                                          | Method of handling abstracts and unpublished studies                                                                                                                                                                                                                         | 6                           |
| 16                                          | Description of any contact with authors                                                                                                                                                                                                                                      | 7                           |
| Reporting of methods should include         |                                                                                                                                                                                                                                                                              |                             |
| 17                                          | Description of relevance or appropriateness of studies assembled for assessing the hypothesis to be tested                                                                                                                                                                   | 6                           |
| 18                                          | Rationale for the selection and coding of data (eg, sound clinical principles or convenience)                                                                                                                                                                                | 6-9                         |
| 19                                          | Documentation of how data were classified and coded (eg, multiple raters, blinding and interrater reliability)                                                                                                                                                               | 6-9                         |
| 20                                          | Assessment of confounding (eg, comparability of cases and controls in studies where appropriate)                                                                                                                                                                             | 8, Figure 2                 |
| 21                                          | Assessment of study quality, including blinding of quality assessors, stratification or regression on possible predictors of study results                                                                                                                                   | 7, Table S1, Figure 2       |
| 22                                          | Assessment of heterogeneity                                                                                                                                                                                                                                                  | 8, 9                        |
| 23                                          | Description of statistical methods (eg, complete description of fixed or random effects models, justification of whether the chosen models account for predictors of study results, dose-response models, or cumulative meta-analysis) in sufficient detail to be replicated | 8, 9                        |
| 24                                          | Provision of appropriate tables and graphics                                                                                                                                                                                                                                 | Tables 1, 2. Figures 1, 2,3 |
| Reporting of results should include         |                                                                                                                                                                                                                                                                              |                             |
| 25                                          | Graphic summarizing individual study estimates and overall estimate                                                                                                                                                                                                          | Figure 3, Figure S1 to S8   |

|    |                                                              |         |
|----|--------------------------------------------------------------|---------|
| 26 | Table giving descriptive information for each study included | Table 1 |
| 27 | Results of sensitivity testing (eg, subgroup analysis)       | 12      |
| 28 | Indication of statistical uncertainty of findings            | Table 2 |

| Item No                                 | Recommendation                                                                                                            | Reported on Page No |
|-----------------------------------------|---------------------------------------------------------------------------------------------------------------------------|---------------------|
| Reporting of discussion should include  |                                                                                                                           |                     |
| 29                                      | Quantitative assessment of bias (eg, publication bias)                                                                    | 8, 9                |
| 30                                      | Justification for exclusion (eg, exclusion of non-English language citations)                                             | Figure 1            |
| 31                                      | Assessment of quality of included studies                                                                                 | Figure 2            |
| Reporting of conclusions should include |                                                                                                                           |                     |
| 32                                      | Consideration of alternative explanations for observed results                                                            | 12-16               |
| 33                                      | Generalization of the conclusions (ie, appropriate for the data presented and within the domain of the literature review) | 15-16               |
| 34                                      | Guidelines for future research                                                                                            | 16-17               |
| 35                                      | Disclosure of funding source                                                                                              | 1                   |

From: Stroup DF, Berlin JA, Morton SC, et al, for the Meta-analysis Of Observational Studies in Epidemiology (MOOSE) Group. Meta-analysis of Observational Studies in Epidemiology. A Proposal for Reporting. *JAMA*. 2000;283(15):2008-2012. doi: 10.1001/jama.283.15.2008.

Transcribed from the original paper within the NEUROSURGERY® Editorial Office, Atlanta, GA, United States. August 2012.
