# Supplementary material for: Preoperative predictors of poor acute postoperative pain control: a systematic review and meta-analysis
Source: PubMed Central journal article supplement — BMJ Open. 2019 Apr 1;9(4):e025091. doi: 10.1136/bmjopen-2018-025091 (PMC6500309; doi:10.1136/bmjopen-2018-025091), 2019-04-01
Supplement: bmjopen-2018-025091supp002.pdf [file bmjopen-2018-025091supp002.pdf]

**Table S1. Quality indicators for studies of prognosis.**<sup>35</sup>

| <b>Quality Indicators</b>                 | <b>Description</b>                                                                                                                                                                |
|-------------------------------------------|-----------------------------------------------------------------------------------------------------------------------------------------------------------------------------------|
| <b>Adequate description of population</b> | Study described inclusion criteria for selecting patients, and when enrolled patients described demographics (at least age and sex).                                              |
| <b>Non-biased selection</b>               | Study either reported enrolling (or attempting to enroll) a consecutive series of patients meeting the inclusion criteria, or a random sample.                                    |
| <b>Low loss to follow-up</b>              | Postoperative pain measurements were available for at least 80% of patients for whom exposure data were collected.                                                                |
| <b>Adequate predictor measurement</b>     | Study described reproducible and appropriate methods for measuring relevant predictors.                                                                                           |
| <b>Adequate outcome measurement</b>       | Study utilized one of the following validated pain scales: VAS, VRS, and NRS.                                                                                                     |
| <b>Blinded outcome assessments</b>        | Study reported that outcomes were assessed by persons without knowledge of prognostic factors or that the pain outcome was determined by personnel not aware of study objectives. |
| <b>Adequate statistical adjustment</b>    | Study performed statistical adjustment or controlled for at least 3 potential confounders using acceptable statistical methods.                                                   |
| <b>Precision of results</b>               | Confidence intervals reported for the main outcomes of the study.                                                                                                                 |
| <b>Reference standard</b>                 | The study defined what was considered poor or good postoperative pain control.                                                                                                    |

VAS- visual analogue scale, VRS- verbal rating scale, NRS- numeric rating scale
